# Supplementary material for: Co-regulation and function of FOXM1/RHNO1 bidirectional genes in cancer
Source: eLife journal article supplement (doi:10.7554/elife.55070), 2021-04-23
Supplement: supp [file elife-55070-supp-v1.zip]

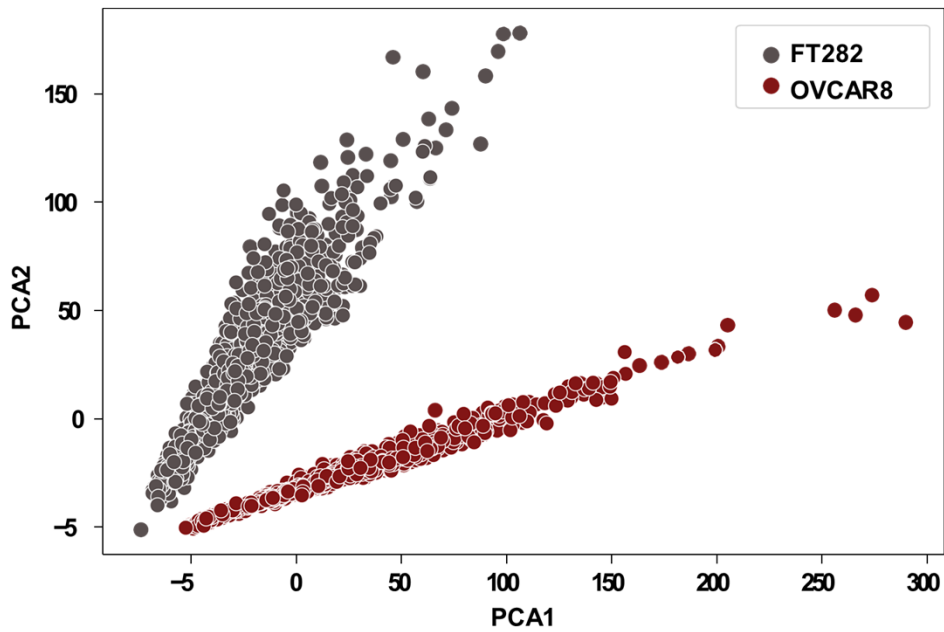

**Fig 5-figure supplement 1. Principal component analyses (PCA) of FT282 (n=1440) and OVCAR8 (n=1454) single cells, using scRNA-seq data.** PCA analyses were performed using Python.
