# Supplementary material for: Co-regulation and function of FOXM1/RHNO1 bidirectional genes in cancer
Source: eLife journal article supplement (doi:10.7554/elife.55070), 2021-04-23
Supplement: supp [file elife-55070-supp-v1.zip]

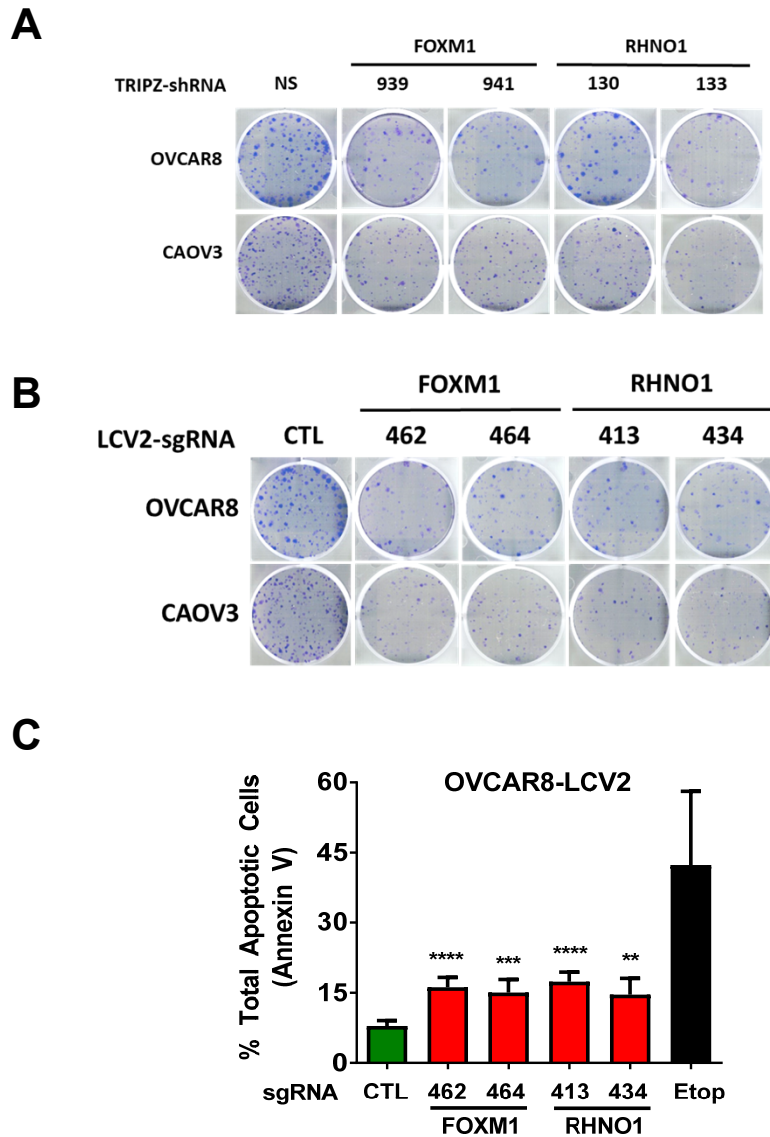

**Fig 11-figure supplement 1. FOXM1 and RHNO1 each promote HGSC cell clonogenic growth.** (A) Representative colony formation data for OVCAR8 and CAOV3 cells sustaining FOXM1 or RHNO1 knockdown. NS = non-targeting shRNA. (B) Representative colony formation data for OVCAR8 and CAOV3 cells sustaining FOXM1 or RHNO1 CRISPR knockout. CTL = control guide RNA. (C) Annexin V apoptosis assay results for OVCAR8 cells sustaining FOXM1 or RHNO1 CRISPR knockout. Etoposide-treated cells served as the positive control for apoptosis. T-test P-values: \*\*\*\* < 0.0001, \*\*\* < 0.001, \*\* < 0.01, \* < 0.05.
