# Supplementary material for: Co-regulation and function of FOXM1/RHNO1 bidirectional genes in cancer
Source: eLife journal article supplement (doi:10.7554/elife.55070), 2021-04-23
Supplement: supp [file elife-55070-supp-v1.zip]

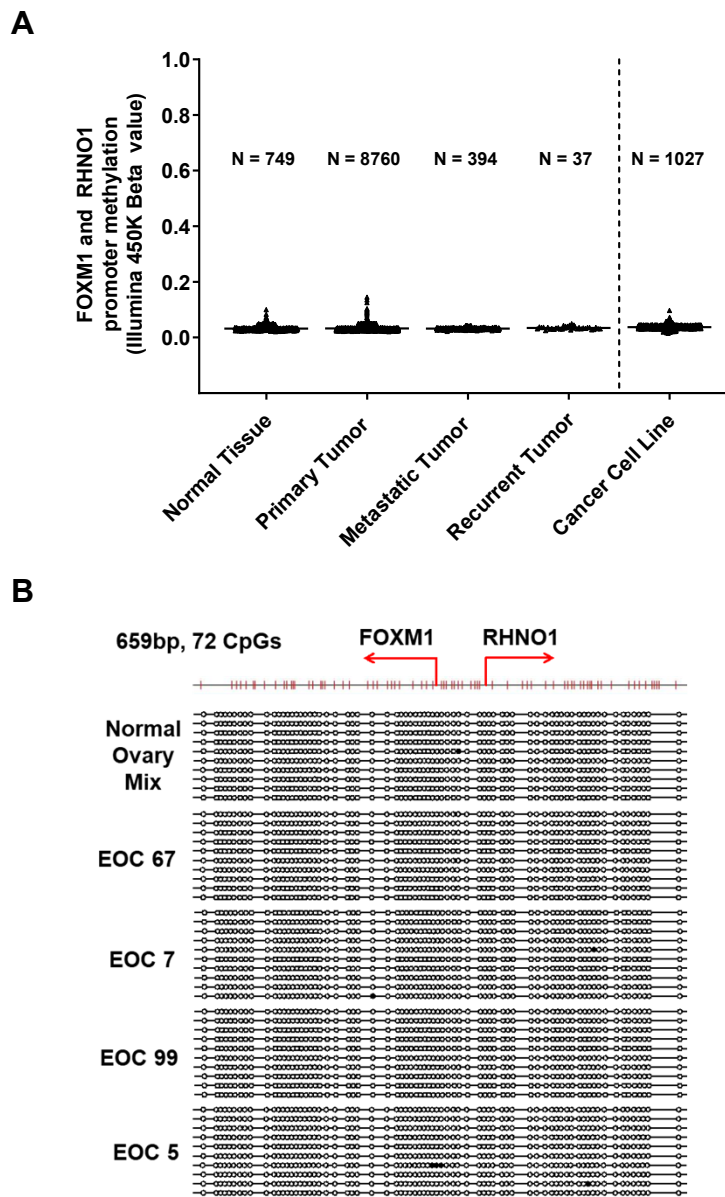

**Figure 2-figure supplement 1. The *FOXM1/RHO1* bidirectional promoter (F/R-BDP) region is hypomethylated in normal and cancer tissues.** (A) Distribution of DNA methylation at the F/R-BDP in TCGA normal and tumor tissues and CCLE cancer cell lines. Beta values represent the level of DNA methylation, averaged across seven CpG sites within the F/R-BDP CpG island. A value of one corresponds to fully methylated, while a value of zero corresponds to fully unmethylated. (B) F/R-BDP regional DNA methylation as determined by sodium bisulfite clonal sequencing. Gene transcriptional start sites are indicated by the red broken arrows. Filled and open circles indicate methylated and unmethylated CpG sites, respectively, and each row represents one sequenced allele. Four separate epithelial ovarian cancer (EOC) samples with patient identifiers are shown. A mixture of normal ovary samples was analyzed as a control.
