# Supplementary material for: Co-regulation and function of FOXM1/RHNO1 bidirectional genes in cancer
Source: eLife journal article supplement (doi:10.7554/elife.55070), 2021-04-23
Supplement: supp [file elife-55070-supp-v1.zip]

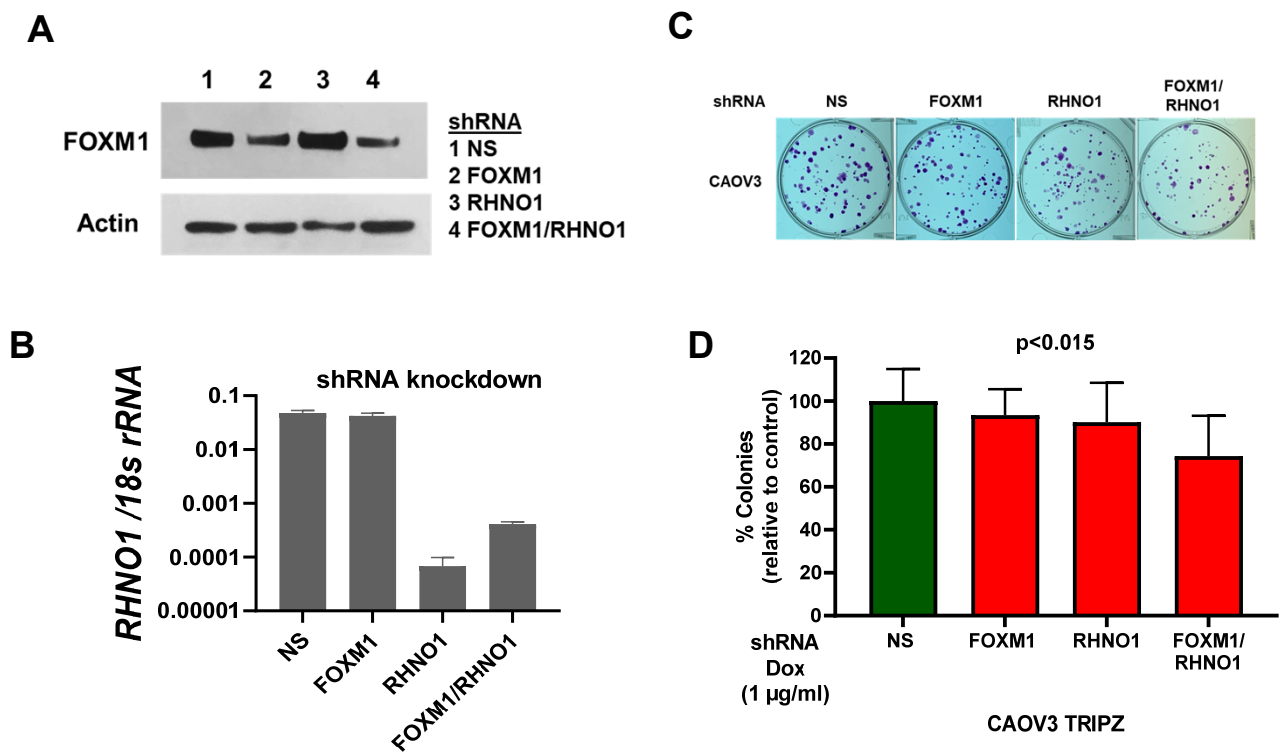

**Fig 12-figure supplement 1. CAOV3 cells with dual FOXM1 and RHNO1 shRNA knockdown have diminished clonogenic growth.** CAOV3 HGSC cells were engineered for dox-inducible FOXM1 and/or RHNO1 shRNA knockdown. CAOV3 cells treated with dox for 72 hours followed by (A) Western blot confirmation of FOXM1 knockdown, or (B) RT-qPCR confirmation of *RHNO1* knockdown. (C) Representative clonogenic growth data. Cells were seeded into a 6-well dish, in triplicate, at a density of 500 cells. Dox was added at the time of seeding and media containing dox was replenished every 48 hours. Clonogenic survival was measured at 12 days, cells were fixed with methanol and stained with crystal violet. (D) Quantification of clonogenic growth data. Colonies containing more than 50 cells were counted and clonogenic survival was quantified as an average of the replicates. NS = non-targeting shRNA. The ANOVA linear trend p-value is shown.
