# Supplementary material for: Co-regulation and function of FOXM1/RHNO1 bidirectional genes in cancer
Source: eLife journal article supplement (doi:10.7554/elife.55070), 2021-04-23
Supplement: supp [file elife-55070-supp-v1.zip]

Archive with 13 entries (13 files):
- elife_poa_e55070_Supplementary_file_1.docx
- elife_poa_e55070_Supplementary_file_2.xlsx
- elife_poa_e55070_Figure_2_figure_supplement_1.pdf
- elife_poa_e55070_Figure_2_figure_supplement_2.pdf
- elife_poa_e55070_Figure_5_figure_supplement_1.pdf
- elife_poa_e55070_Figure_9_figure_supplement_1.pdf
- elife_poa_e55070_Figure_9_figure_supplement_2.pdf
- elife_poa_e55070_Figure_11_figure_supplement_1.pdf
- elife_poa_e55070_Figure_11_figure_supplement_2.pdf
- elife_poa_e55070_Figure_12_figure_supplement_1.pdf
- elife_poa_e55070_Figure_17_figure_supplement_1.pdf
- elife_poa_e55070_Transparent_Reporting_File.docx
- elife_poa_e55070_Supplementary_file_3.xlsx
