# Supplementary material for: Co-regulation and function of FOXM1/RHNO1 bidirectional genes in cancer
Source: eLife journal article supplement (doi:10.7554/elife.55070), 2021-04-23
Supplement: supp [file elife-55070-supp-v1.zip › elife_poa_e55070_Figure_2_figure_supplement_2.pdf]

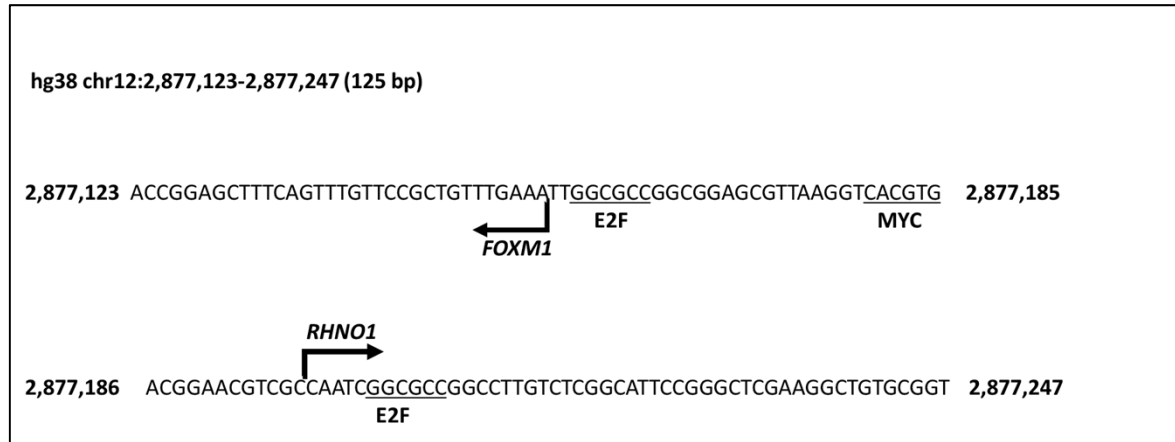

**Figure 2-figure supplement 2. DNA sequence of the *FOXM1/RHNO1* bidirectional promoter (F/R-BDP).** Transcriptional start sites predicted by NCBI are shown with broken arrows. E2F and MYC sites, known to regulate BDPs and *FOXM1*, are indicated.
