# Supplementary material for: Co-regulation and function of FOXM1/RHNO1 bidirectional genes in cancer
Source: eLife journal article supplement (doi:10.7554/elife.55070), 2021-04-23
Supplement: supp [file elife-55070-supp-v1.zip › elife_poa_e55070_Figure_9_figure_supplement_1.pdf]

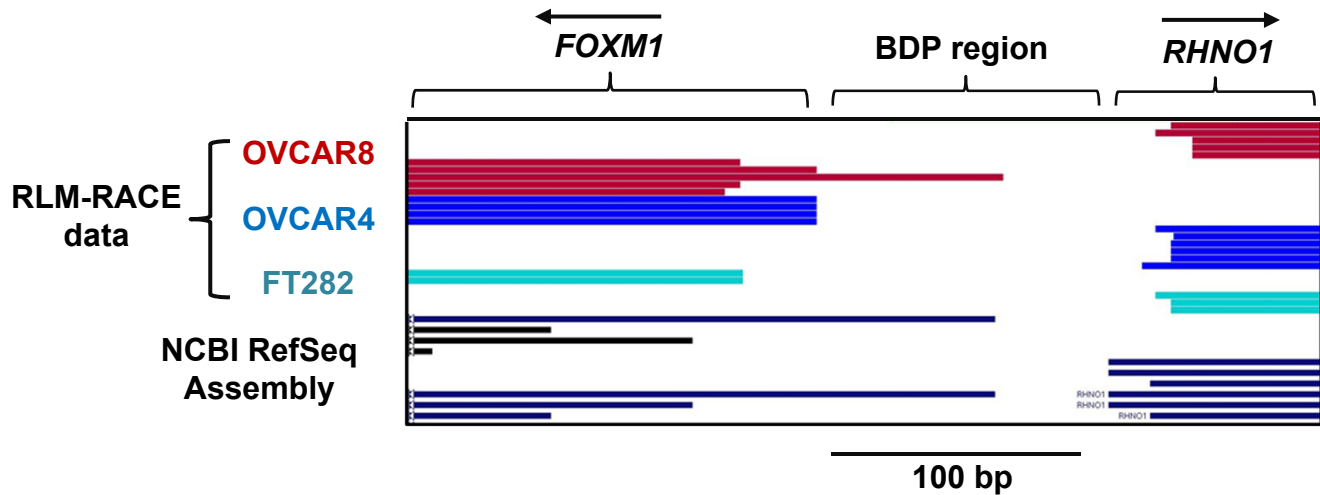

**Figure 9-figure supplement 1. *FOXM1* and *RHNO1* transcriptional start sites (TSS).** RLM-RACE mapping data of the 5' ends of *FOXM1* and *RHNO1* mRNA. The arrows indicate the orientation of each gene 5' to 3'. The bars indicate the sequenced 5' ends of each transcript, with the names of the individual cell line samples (color coded) at left. NCBI RefSeq transcript assembly data is shown at bottom.
