# Supplementary material for: Co-regulation and function of FOXM1/RHNO1 bidirectional genes in cancer
Source: eLife journal article supplement (doi:10.7554/elife.55070), 2021-04-23
Supplement: supp [file elife-55070-supp-v1.zip › elife_poa_e55070_Figure_9_figure_supplement_2.pdf]

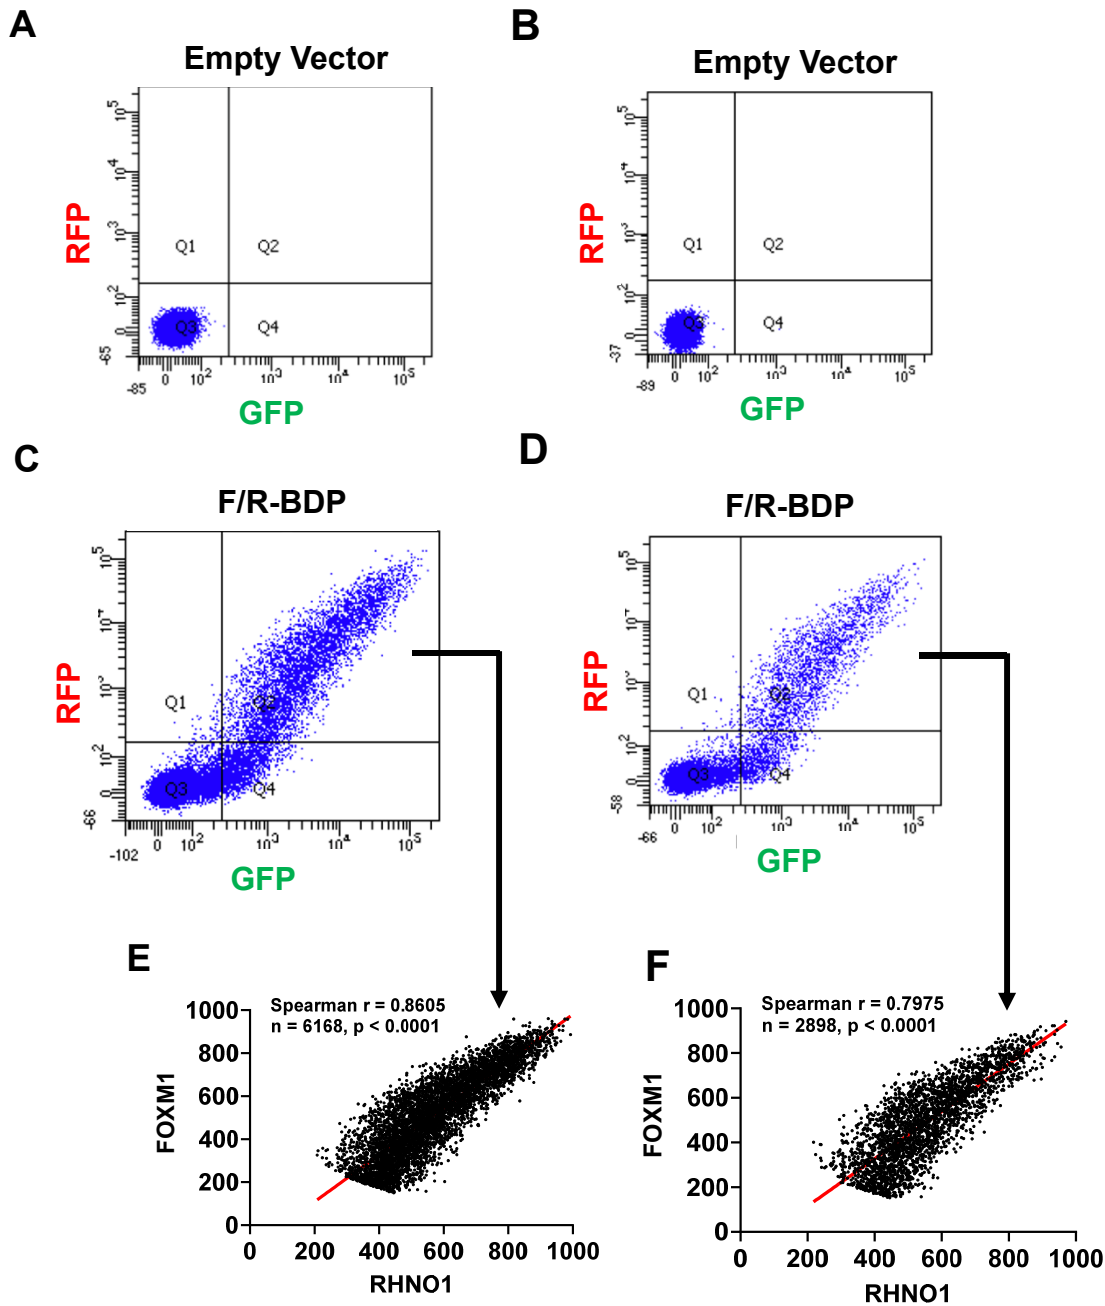

**Figure 9-figure supplement 2. FACS analyses of RFP and GFP expression in 293T cells. (A-B) Empty vector transfections. (C-D) F/R-BPD dual reporter transfections. The reporter schematic is shown in Fig 9E. (E-F) Spearman correlation analyses of Quadrant 2 (i.e. RFP+GFP+ cells) from panels C-D as indicated.**
