# Supplementary material for: Co-regulation and function of FOXM1/RHNO1 bidirectional genes in cancer
Source: eLife journal article supplement (doi:10.7554/elife.55070), 2021-04-23
Supplement: supp [file elife-55070-supp-v1.zip › elife_poa_e55070_Figure_11_figure_supplement_2.pdf]

**A**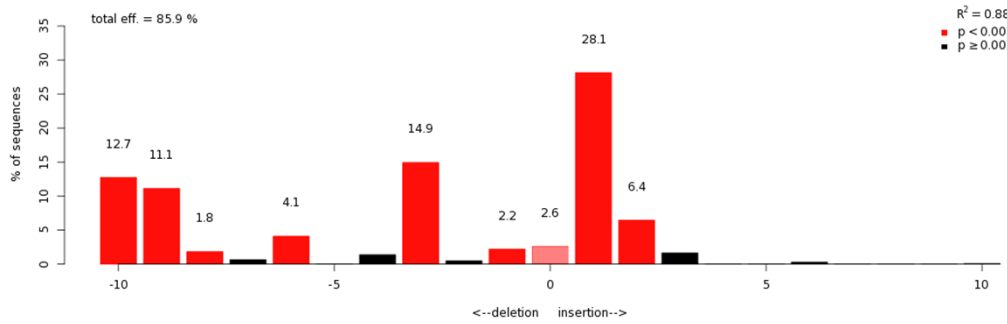**B**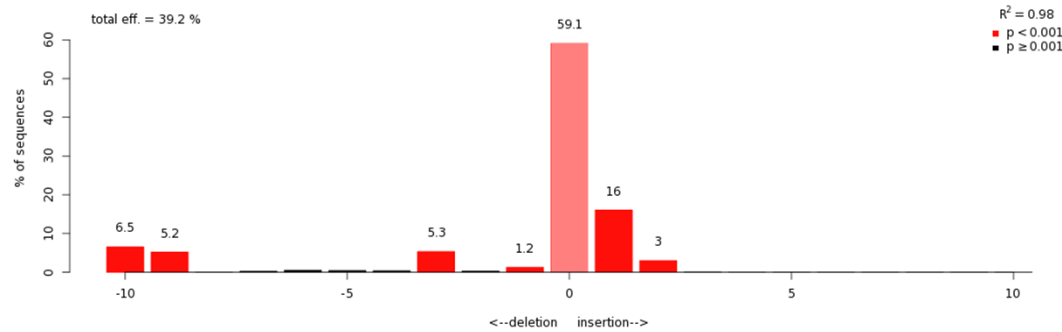**C**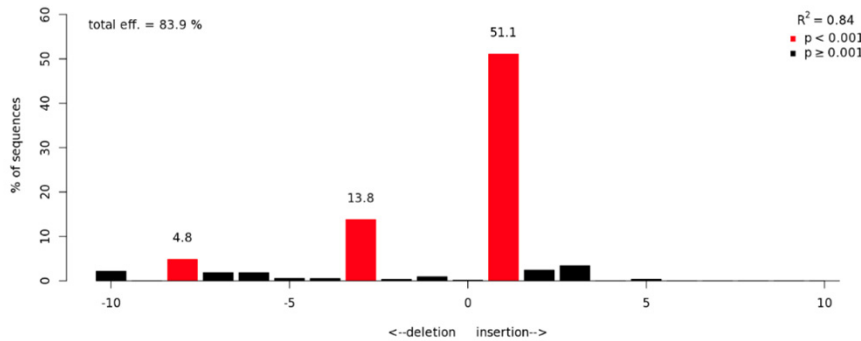**D**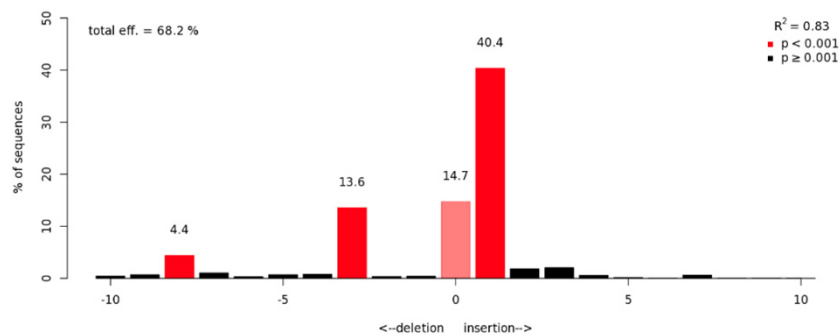

**Fig 11-figure supplement 2. Representative TIDE analyses data for HGSC cells sustaining FOXM1 or RHNO1 CRISPR gene knockout.** OVCAR8 and CAOV3 cells engineered for FOXM1 or RHNO1 CRISPR knockout were assessed for indel frequency among a mixed pool of cells. **A-D.** Indel spectra for **(A)** OVCAR8 LCV2 FOXM1 462 cells. **(B)** CAOV3 LVC2 FOXM1 462 cells. **(C)** OVCAR8 LCV2 RHNO1 413 cells. **(D)** CAOV3 LCV2 RHNO1 413 cells.
