# Supplementary material for: Co-regulation and function of FOXM1/RHNO1 bidirectional genes in cancer
Source: eLife journal article supplement (doi:10.7554/elife.55070), 2021-04-23
Supplement: supp [file elife-55070-supp-v1.zip › elife_poa_e55070_Supplementary_file_2.xlsx]

## Sheet: S1 Oligos
Supplementary File 2. Oligonucleotide Sequences
Oligo Name	Species	Application	Sequnce 5' to 3'
RHNO1_2884979_PCR_F	Human	TIDE PCR	CTCCTCGAAACAGGGATGACC
RHNO1_2885553_PCR_R	Human	TIDE PCR	AGTAATCCCATGGGCCTACC
FOXM1_2874765_F	Human	TIDE PCR	ATCTCCAACCCAGTCCCATTTT
FOXM1_2874249_R	Human	TIDE PCR	GCCACTACTTGCGTGTTGGG
AAVS1	Human	sgRNA	GGGGCCACTAGGGACAGGAT
FOXM1 462	Human	sgRNA	TGAGAATCAGTGGCCGACGG
FOXM1 464	Human	sgRNA	TAATGAAAACTAGCCCCCGT
RHNO1 413	Human	sgRNA	TTGTTGGTGGAACAGCAGCG
RHNO1 434	Human	sgRNA	GTTCCACCAACAACCACTGG
FOXM1/RHNO1 Promoter 2877184	Human	sgRNA	GGAGCGTTAAGGTCACGTGA
FOXM1/RHNO1 Promoter 2877199	Human	sgRNA	CGTGACGGAACGTCGCCAAT
FOXM1/RHNO1 Promoter 2877205	Human	sgRNA	GGAACGTCGCCAATCGGCGC
FOXM1/RHNO1 Promoter 2877233	Human	sgRNA	TCTCGGCATTCCGGGCTCGA
FOXM1/RHNO1 Promoter 2877299	Human	sgRNA	TTCCCCCACAAGCCGGCCTG
FOXM1/RHNO1 Promoter 2877363	Human	sgRNA	CCTCGGCTCGCCCACCCACG
FOXM1/RHNO1 Promoter 2877163	Human	sgRNA	CTGTTTGAAATTGGCGCCGG
FOXM1/RHNO1 Promoter 2877130	Human	sgRNA	GCGGAACAAACTGAAAGCTC
FOXM1/RHNO1 Promoter 2877070	Human	sgRNA	TCCCCTCCCGGGATCCCCCG
NT1 - non-targeting	N/A	sgRNA	GCTGAAAAAGGAAGGAGTTGA
NT2- non-targeting	N/A	sgRNA	GAAGATGAAAGGAAAGGCGTT
18s rRNA F	Human	RT-qPCR	CAGCCACCCGAGATTGAGCA
18s rRNA R	Human	RT-qPCR	TAGTAGCGACGGGCGGTGTG
FOXM1 F	Human	RT-qPCR	GCAGGCTGCACTATCAACAA
FOXM1 R	Human	RT-qPCR	TCGAAGGCTCCTCAACCTTA
RAD51 F	Human	RT-qPCR	CGCTGCGGACCGAGTAAT
RAD51 R	Human	RT-qPCR	GGCAACAGCCTCCACAGTAT
RHNO1 145 F	Human	RT-qPCR	AGCAAGCCCATTGACCACAG
RHNO1 145 R	Human	RT-qPCR	TTCGACTTGAGTGTCTCGCC
RHNO1 1245 F	Human	RT-qPCR	TCATTCACCGGTTGATGCCT
RHNO1 1245 R	Human	RT-qPCR	CACCTGTCGAGTGTGAGTGA
ATR F	Human	RT-qPCR	TGATATGGTGGAAATTCTTGCTTC
ATR R	Human	RT-qPCR	TCTCTTCTACGAGACTCTGCATC
CCNB1 F	Human	RT-qPCR	AACTTTCGCCTGAGCCTATTTT
CCNB1 R	Human	RT-qPCR	TTGGTCTGACTGCTTGCTCTT’
CDC25B F	Human	RT-qPCR	CCTCCGAATCTTCTGATGCAG
CDC25B R	Human	RT-qPCR	GCGTCTGATGGCAAACTGC
BRCA2 F	Human	RT-qPCR	CAAGCAGATGATGTTTCCTGTCC
BRCA2 R	Human	RT-qPCR	AGAACTAAGGGTGGGTGGTGTAGC
RHNO1_EX2_PCR_F	Human	PCR Genotype	GCATGGGTTGGAATTGGAGC
RHNO1_UTR_PCR_R	Human	PCR Genotype	GCTTGAACCCAGGAAGTGGT
RHNO1_INT2_PCR_R	Human	PCR Genotype	AGTAATCCCATGGGCCTACC
NS - Nonsilencing control	N/A	mir30-shRNA	CTCGCTTGGGCGAGAGTAA
RHNO1 403203	Human	mir30-shRNA	TTTCTATTGAGATTACTGA
RHNO1 324131	Human	mir30-shRNA	TGTTGGTGGAACAGCAGCG
RHNO1 324133	Human	mir30-shRNA	TCGACTTGAGTGTCTCGCC
RHNO1 324130	Human	mir30-shRNA	ATTCCATACTTGTCCTCGG
RHNO1 117443	Human	mir30-shRNA	TCGACTTGAGTGTCTCGCC
RHNO1 117442	Human	mir30-shRNA	TAAGGTAAGCTCTGAAGTG
FOXM1 283849	Human	mir30-shRNA	ATAATTAGAGGATAATTTG
FOXM1 396941	Human	mir30-shRNA	TGATGGTCATGTTCCGGCG
FOXM1 311190	Human	mir30-shRNA	TTCTGCTGCTTAAACACCT
FOXM1 396938	Human	mir30-shRNA	CTAGGAAGATTCACATCCC
FOXM1 396939	Human	mir30-shRNA	ATTGTTGATAGTGCAGCCT
FOXM1-RHNO1 BS	Human	Bisulfite PCR	TTTTTTAGTGAGGAAATTAATTAAAGT
FOXM1-RHNO1 BS	Human	Bisulfite PCR	CAAACCAAACCTAAAACTCCATTAC
RHNO1-5’RACE-outer_+424-R1	Human	5' RACE	CTGACATGTTCCCACAGCTTTG
RHNO1-5”RACE-inner_+270 R2	Human	5' RACE	CTTGGAGGTGGTAGGTTTTCGA
RHNO1-5’RACE-outer +349-R1	Human	5' RACE	TGGAAGATTGCGGACTCTCAAA
FOXM1-5’RACE-outer_+400 R1	Human	5' RACE	TCCTTTTGGCATCATAGCTGGT
FOXM1-5’RACE-inner_+242 R2	Human	5' RACE	TTGTTGGGGATGGCCACTAC
FOXM1_ 5'RACE-+36 R3	Human	5' RACE	TTTGAGAATCAGTGGCCGAC
5' RACE Outer	Human	5' RACE	GCTGATGGCGATGAATGAACACTG
5' RACE Inner	Human	5' RACE	CGCGGATCCGAACACTGCGTTTGCTGGCTTTGATG
