# Supplementary material for: Co-regulation and function of FOXM1/RHNO1 bidirectional genes in cancer
Source: eLife journal article supplement (doi:10.7554/elife.55070), 2021-04-23
Supplement: supp [file elife-55070-supp-v1.zip › elife_poa_e55070_Supplementary_file_3.xlsx]

## Sheet: OVCAR8 cells scRNA-seq
forward_gene	reverse_gene	pearson_coeff	pct_rank
NDUFB10	RPS2	0.657823	1
DYNLL1	SRSF9	0.653954	0.999457
PRDX5	TRMT112	0.62803	0.998914
NDUFS6	MRPL36	0.589969	0.998371
ARPC5L	RPL35	0.58759	0.997828
ATP5PB	WDR77	0.567041	0.997286
CDC123	NUDT5	0.557209	0.996743
RIBC2	SMC1B	0.556164	0.9962
NDUFB9	TATDN1	0.546973	0.995657
ACTL6A	MRPL47	0.542955	0.995114
TMEM70	ELOC	0.53643	0.994571
DDX19B	AARS1	0.517688	0.994028
ACAT2	TCP1	0.516425	0.993485
UTP23	EIF3H	0.515613	0.992942
TUBA1C	TUBA1A	0.508855	0.9924
COX4I1	EMC8	0.501641	0.991857
MGAT2	RPL36AL	0.486837	0.991314
EMG1	PHB2	0.483018	0.990771
BUD31	PDAP1	0.481334	0.990228
EMC6	TAX1BP3	0.47826	0.989685
ENY2	NUDCD1	0.476856	0.989142
UCHL3	COMMD6	0.471484	0.988599
EIF2S1	ATP6V1D	0.471398	0.988056
SYNGR2	TK1	0.444054	0.987514
SNRNP25	POLR3K	0.443145	0.986971
BORA	MZT1	0.440553	0.986428
ROMO1	RBM39	0.439009	0.985885
TSN	NIFK	0.434643	0.985342
RPL7A	SURF1	0.433426	0.984799
RAD23A	GADD45GIP1	0.433189	0.984256
CPNE3	RMDN1	0.430032	0.983713
RNMT	FAM210A	0.427553	0.98317
LRR1	RPS29	0.42637	0.982628
TSPAN4	POLR2L	0.425426	0.982085
CBX3	HNRNPA2B1	0.424243	0.981542
ATP5F1C	KIN	0.423722	0.980999
DBI	C2orf76	0.420623	0.980456
FAM216A	VPS29	0.418149	0.979913
TBCB	POLR2I	0.417362	0.97937
LYRM7	HINT1	0.4159	0.978827
PFDN6	WDR46	0.415827	0.978284
HAUS1	ATP5F1A	0.411869	0.977742
TECR	NDUFB7	0.411318	0.977199
UBE2Z	SNF8	0.411151	0.976656
FKBP2	PPP1R14B	0.407975	0.976113
PTTG1	SLU7	0.401536	0.97557
MRPL18	TCP1	0.39967	0.975027
TMX2	MED19	0.398525	0.974484
NOP56	IDH3B	0.397494	0.973941
TRAPPC4	RPS25	0.396509	0.973398
UQCR10	ZMAT5	0.394616	0.972856
FAM216A	GPN3	0.393904	0.972313
HNRNPA1	CBX5	0.390145	0.97177
NDUFB5	MRPL47	0.389587	0.971227
GMPR2	NEDD8	0.389556	0.970684
CCDC85B	FOSL1	0.387964	0.970141
NSA2	GFM2	0.386027	0.969598
MRPL49	FAU	0.385413	0.969055
RPS28	NDUFA7	0.382343	0.968512
TRIP13	BRD9	0.379518	0.96797
SDHD	TIMM8B	0.375701	0.967427
HMMR	NUDCD2	0.374734	0.966884
DDX55	EIF2B1	0.374299	0.966341
LRRC42	HSPB11	0.374045	0.965798
TNFRSF12A	HCFC1R1	0.373619	0.965255
TMA7	CCDC51	0.372155	0.964712
CEP295	TAF1D	0.371781	0.964169
OGFOD1	NUDT21	0.370346	0.963626
RPF1	GNG5	0.369923	0.963084
RNF167	PFN1	0.368163	0.962541
GPALPP1	NUFIP1	0.367549	0.961998
CISD2	UBE2D3	0.366489	0.961455
MGST3	ALDH9A1	0.365094	0.960912
HTRA2	AUP1	0.363735	0.960369
PTPN11	RPL6	0.361818	0.959826
COPS6	MCM7	0.361243	0.959283
APEX1	OSGEP	0.359118	0.95874
RPS3	KLHL35	0.35764	0.958198
NELFCD	CTSZ	0.35763	0.957655
TSEN34	MBOAT7	0.35635	0.957112
MRPL32	PSMA2	0.3561	0.956569
CCNG1	NUDCD2	0.35587	0.956026
CDCA2	KCTD9	0.355108	0.955483
SELENOT	SERP1	0.354911	0.95494
KIF20A	BRD8	0.354731	0.954397
USP14	THOC1	0.348557	0.953855
NEK6	PSMB7	0.348492	0.953312
POGLUT1	TMEM39A	0.347748	0.952769
CCDC84	RPS25	0.347115	0.952226
RPS18	VPS52	0.34685	0.951683
OXNAD1	DPH3	0.346844	0.95114
NDUFAF3	IMPDH2	0.345178	0.950597
SURF2	SURF1	0.345057	0.950054
HIGD2A	NOP16	0.344474	0.949511
TRIP10	GPR108	0.343936	0.948969
RPAIN	C1QBP	0.343545	0.948426
SDHA	CCDC127	0.341321	0.947883
MKRN2	RAF1	0.338842	0.94734
HIF1AN	NDUFB8	0.338037	0.946797
MED29	PAF1	0.335429	0.946254
NCAPD2	MRPL51	0.335321	0.945711
HMOX2	CDIP1	0.335031	0.945168
SUPT5H	RPS16	0.333952	0.944625
DNAJA1	APTX	0.333903	0.944083
THOC6	HCFC1R1	0.333745	0.94354
HDAC1	MARCKSL1	0.331947	0.942997
HMGA1	SMIM29	0.331713	0.942454
RO60	UCHL5	0.330948	0.941911
ENOPH1	HNRNPDL	0.330799	0.941368
EIF3L	ANKRD54	0.329905	0.940825
ZFPL1	CDCA5	0.328555	0.940282
ABI3	GNGT2	0.328384	0.939739
TSPAN4	CHID1	0.326553	0.939197
CDCA8	C1orf109	0.326062	0.938654
NSDHL	CETN2	0.325509	0.938111
APEX1	PIP4P1	0.323275	0.937568
EGFL7	AGPAT2	0.322715	0.937025
ORC6	VPS35	0.322491	0.936482
KDM1A	LUZP1	0.32244	0.935939
CTNS	TAX1BP3	0.321607	0.935396
PRPF31	TFPT	0.321279	0.934853
LIAS	RPL9	0.320165	0.934311
C12orf10	AAAS	0.319176	0.933768
RO60	GLRX2	0.319029	0.933225
BANF1	EIF1AD	0.318723	0.932682
SEC61B	ALG2	0.317878	0.932139
CTSA	PLTP	0.317824	0.931596
COMMD1	CCT4	0.317707	0.931053
AP3S1	ATG12	0.317362	0.93051
USP5	CDCA3	0.317031	0.929967
CDC45	UFD1	0.316658	0.929425
TBP	PSMB1	0.316407	0.928882
MVB12A	BST2	0.315036	0.928339
MAP7D1	TRAPPC3	0.315008	0.927796
PRPF4	CDC26	0.314326	0.927253
BAG4	LSM1	0.314301	0.92671
RPS27A	MTIF2	0.313963	0.926167
CDC20	ELOVL1	0.312251	0.925624
PRR11	SKA2	0.312208	0.925081
SEC61A1	MGLL	0.311822	0.924539
ANAPC11	ALYREF	0.311403	0.923996
RPL36	LONP1	0.310957	0.923453
SURF2	SURF4	0.310896	0.92291
MCRIP2	METTL26	0.310442	0.922367
EIF2AK4	SRP14	0.309922	0.921824
CSTF1	AURKA	0.309693	0.921281
CWC27	SREK1IP1	0.307538	0.920738
SH3BGRL3	UBXN11	0.305601	0.920195
RHNO1	FOXM1	0.305289	0.919653
MFSD14A	SASS6	0.304817	0.91911
FZR1	MFSD12	0.303631	0.918567
HARS2	HARS1	0.302809	0.918024
FAM162A	CCDC58	0.301648	0.917481
ESRRA	TRMT112	0.300566	0.916938
GEMIN6	SRSF7	0.298468	0.916395
CCT6A	PSPH	0.297811	0.915852
RAD17	AK6	0.297745	0.915309
RBM10	NDUFB11	0.297204	0.914767
LYPLA2	GALE	0.296686	0.914224
FEN1	TMEM258	0.296578	0.913681
ORC3	RARS2	0.295932	0.913138
ZFYVE19	DNAJC17	0.295736	0.912595
PSMC2	DNAJC2	0.295689	0.912052
MGME1	SNX5	0.295668	0.911509
MAP2K1	TIPIN	0.295609	0.910966
IK	NDUFA2	0.295391	0.910423
ARL6IP6	PRPF40A	0.29516	0.909881
MVK	MMAB	0.294824	0.909338
ADK	AP3M1	0.294037	0.908795
NAA35	GOLM1	0.294016	0.908252
CHMP5	BAG1	0.293212	0.907709
MRPS11	MRPL46	0.291901	0.907166
CCNK	SETD3	0.291672	0.906623
DCAF13	SLC25A32	0.290247	0.90608
ZCCHC17	SNRNP40	0.290215	0.905537
CNOT3	LENG1	0.290089	0.904995
BZW2	ANKMY2	0.288852	0.904452
ISCA2	NPC2	0.288796	0.903909
BLZF1	NME7	0.288246	0.903366
PHF1	CUTA	0.286152	0.902823
PTDSS1	MTERF3	0.286125	0.90228
SEC23IP	MCMBP	0.285494	0.901737
NUTF2	CENPT	0.284575	0.901194
UBL5	FBXL12	0.284311	0.900651
ADGRE5	DDX39A	0.284047	0.900109
MRPS18B	PPP1R10	0.283779	0.899566
PGM1	ITGB3BP	0.283484	0.899023
PSMG2	SPIRE1	0.282969	0.89848
HACD3	INTS14	0.282435	0.897937
NDC80	METTL4	0.282262	0.897394
UCK2	TMCO1	0.281022	0.896851
MRRF	RBM18	0.280323	0.896308
C16orf71	ANKS3	0.2803	0.895765
EEF1B2	NDUFS1	0.279956	0.895223
GPN1	SUPT7L	0.279951	0.89468
MARS1	DDIT3	0.279788	0.894137
PDCD11	ATP5MD	0.279352	0.893594
RBBP4	ZBTB8OS	0.279217	0.893051
ADAM9	TM2D2	0.279071	0.892508
RPAIN	NUP88	0.278904	0.891965
ACOT13	TDP2	0.278835	0.891422
UQCRH	LRRC41	0.277443	0.890879
PSMC5	SMARCD2	0.277373	0.890337
GTF3A	MTIF3	0.27677	0.889794
BCS1L	RNF25	0.274461	0.889251
WDR55	HARS1	0.274421	0.888708
COQ9	CIAPIN1	0.273081	0.888165
MLX	PSMC3IP	0.272482	0.887622
GNL3	GLT8D1	0.271837	0.887079
SDHAF2	CPSF7	0.271723	0.886536
RPL23A	TLCD1	0.271305	0.885993
CYB561D2	NPRL2	0.271217	0.885451
RSPRY1	PSME3IP1	0.271022	0.884908
ABCE1	ANAPC10	0.27094	0.884365
EIF5B	REV1	0.270764	0.883822
CXADR	BTG3	0.270722	0.883279
NPAS1	TMEM160	0.270453	0.882736
GGPS1	ARID4B	0.269991	0.882193
PDSS1	ABI1	0.269885	0.88165
TERF2IP	KARS1	0.269873	0.881107
CTU2	RNF166	0.269438	0.880565
NIT1	PFDN2	0.269259	0.880022
EEFSEC	RUVBL1	0.268539	0.879479
VPS37A	CNOT7	0.267909	0.878936
SNAPIN	ILF2	0.267753	0.878393
NUDC	GPATCH3	0.267417	0.87785
RNF139	TATDN1	0.267176	0.877307
TRAPPC2L	GALNS	0.266884	0.876764
JARID2	DTNBP1	0.266834	0.876221
METTL23	SRSF2	0.266242	0.875679
MRPL37	SSBP3	0.264062	0.875136
MRPL57	SKA3	0.26286	0.874593
DDX49	COPE	0.262666	0.87405
SERF2	MFAP1	0.261357	0.873507
WBP4	ELF1	0.260967	0.872964
BUD23	DNAJC30	0.260554	0.872421
METTL23	JMJD6	0.260512	0.871878
NUDT1	SNX8	0.260449	0.871336
FXR1	DNAJC19	0.26035	0.870793
RAC3	DCXR	0.26007	0.87025
AAMDC	RSF1	0.259835	0.869707
HOOK3	RNF170	0.259456	0.869164
MIS12	DERL2	0.258938	0.868621
TBC1D31	DERL1	0.258835	0.868078
COMT	TXNRD2	0.258741	0.867535
NUDT15	SUCLA2	0.258526	0.866992
SRSF11	LRRC40	0.258418	0.86645
PARPBP	NUP37	0.258175	0.865907
C19orf33	YIF1B	0.257559	0.865364
NSMCE2	WASHC5	0.257525	0.864821
HSP90AB1	SLC35B2	0.257438	0.864278
ING5	DTYMK	0.257258	0.863735
RNF167	SLC25A11	0.256846	0.863192
PNKD	AAMP	0.256678	0.862649
UBAP2L	C1orf43	0.256334	0.862106
PINK1	DDOST	0.255994	0.861564
EIF3I	TMEM234	0.255887	0.861021
IMP4	CCDC115	0.254709	0.860478
SYTL3	EZR	0.254576	0.859935
DRAP1	C11orf68	0.253815	0.859392
NKAPD1	TIMM8B	0.253744	0.858849
NDUFAF5	ESF1	0.253603	0.858306
MTBP	MRPL13	0.253343	0.857763
AGBL5	OST4	0.252992	0.85722
CUL4A	PCID2	0.250912	0.856678
EIF2S1	PLEK2	0.250563	0.856135
PTPMT1	CELF1	0.250231	0.855592
DCAF10	EXOSC3	0.249901	0.855049
GPATCH11	EIF2AK2	0.249702	0.854506
DHX30	MAP4	0.24969	0.853963
FARS2	LYRM4	0.249004	0.85342
NCAPH2	LMF2	0.248256	0.852877
CNOT11	RNF149	0.248192	0.852334
UNC50	COA5	0.24815	0.851792
EIF3B	SNX8	0.247872	0.851249
HSF1	DGAT1	0.247816	0.850706
ZNF207	C17orf75	0.247345	0.850163
PNO1	WDR92	0.246704	0.84962
NDUFS3	CELF1	0.245932	0.849077
CHMP4C	ZFAND1	0.245457	0.848534
UBE2B	CDKL3	0.245221	0.847991
FAHD1	HAGH	0.24429	0.847448
SON	GART	0.243863	0.846906
ARPC4	TADA3	0.24357	0.846363
POP1	RIDA	0.243082	0.84582
HSBP1L1	TXNL4A	0.242758	0.845277
SNX1	CIAO2A	0.241118	0.844734
C11orf49	ARFGAP2	0.240966	0.844191
PFKP	PITRM1	0.240712	0.843648
POLR2C	DOK4	0.240546	0.843105
HGS	ARL16	0.240122	0.842562
CDT1	APRT	0.239832	0.84202
CENPO	PTRHD1	0.239621	0.841477
RPS6KB2	CORO1B	0.239574	0.840934
C9orf85	ABHD17B	0.239273	0.840391
KIF20A	CDC23	0.239117	0.839848
SNAP23	ZNF106	0.238934	0.839305
PI4K2A	AVPI1	0.237783	0.838762
RAD9B	VPS29	0.237583	0.838219
ACADVL	DVL2	0.237403	0.837676
CKS1B	SHC1	0.236236	0.837134
CCT7	PRADC1	0.234457	0.836591
MCM4	PRKDC	0.234372	0.836048
RITA1	DDX54	0.233923	0.835505
SPHK2	RPL18	0.233711	0.834962
NUDT22	TRPT1	0.233042	0.834419
ARCN1	IFT46	0.232564	0.833876
PRIMPOL	CENPU	0.232483	0.833333
TYW3	CRYZ	0.231956	0.83279
LRRC14	RECQL4	0.231627	0.832248
BCL2L12	IRF3	0.230591	0.831705
NKTR	SEC22C	0.230456	0.831162
NDUFV3	WDR4	0.230314	0.830619
USO1	G3BP2	0.230295	0.830076
MRPS7	MIF4GD	0.230068	0.829533
ZDHHC16	EXOSC1	0.229978	0.82899
PPWD1	CENPK	0.229451	0.828447
ORMDL2	DNAJC14	0.228718	0.827904
AP4M1	MCM7	0.228711	0.827362
PSME1	EMC9	0.228375	0.826819
SF3B3	COG4	0.228235	0.826276
C4orf48	NELFA	0.226569	0.825733
RPL7A	MED22	0.226231	0.82519
NABP2	RNF41	0.226077	0.824647
TPI1	SPSB2	0.225563	0.824104
VMP1	PTRH2	0.225449	0.823561
ILK	RRP8	0.225329	0.823018
IGHMBP2	MRPL21	0.225185	0.822476
ATG4B	THAP4	0.22502	0.821933
SH3BGRL	HMGN5	0.224866	0.82139
SNX17	EIF2B4	0.224607	0.820847
REEP3	JMJD1C	0.224593	0.820304
CREB3	TLN1	0.22435	0.819761
TCEA2	RGS19	0.223986	0.819218
SAMD4B	PAF1	0.223584	0.818675
ZNHIT1	PLOD3	0.223093	0.818132
PAICS	PPAT	0.222823	0.81759
GPX3	TNIP1	0.222582	0.817047
NUDT16L1	ANKS3	0.221428	0.816504
XPNPEP3	ST13	0.220592	0.815961
PRR7	DBN1	0.220188	0.815418
MCM2	TPRA1	0.219818	0.814875
TYW1	SBDS	0.219418	0.814332
SPATA33	CHMP1A	0.219124	0.813789
EIF4A2	RFC4	0.21893	0.813246
XKR9	LACTB2	0.218886	0.812704
TCF19	CCHCR1	0.218869	0.812161
CCDC18	TMED5	0.218832	0.811618
TNFAIP1	POLDIP2	0.218613	0.811075
MCUB	CASP6	0.218456	0.810532
TIMM10B	ARFIP2	0.217864	0.809989
MTREX	DHX29	0.217691	0.809446
PMPCA	ENTR1	0.217267	0.808903
EXOSC8	SUPT20H	0.216953	0.80836
SDCCAG8	CEP170	0.216669	0.807818
SLC39A9	ERH	0.215944	0.807275
PPME1	C2CD3	0.215931	0.806732
WDR48	GORASP1	0.215026	0.806189
DMAP1	ERI3	0.214878	0.805646
DNAJB4	FUBP1	0.214744	0.805103
DZIP3	CIP2A	0.214323	0.80456
PEX14	DFFA	0.214269	0.804017
SHOC2	BBIP1	0.214189	0.803474
EWSR1	RHBDD3	0.214071	0.802932
PSMG4	TUBB2B	0.213445	0.802389
GMPR2	TINF2	0.213257	0.801846
SLC4A2	FASTK	0.213231	0.801303
RNF5	AGPAT1	0.213134	0.80076
EML4	COX7A2L	0.213134	0.800217
RNF34	ANAPC5	0.212245	0.799674
PUSL1	INTS11	0.212026	0.799131
SH2B1	TUFM	0.211754	0.798588
CCT5	ATPSCKMT	0.211661	0.798046
ISG15	HES4	0.211601	0.797503
GOLT1B	RECQL	0.211487	0.79696
NPW	ZNF598	0.211339	0.796417
ATG4A	PSMD10	0.211336	0.795874
HNRNPH2	GLA	0.211267	0.795331
ROMO1	NFS1	0.210745	0.794788
SLC30A7	EXTL2	0.210489	0.794245
HMBS	H2AX	0.210185	0.793702
SPG7	ANKRD11	0.210175	0.79316
C14orf119	ACIN1	0.208981	0.792617
NUDT1	MRM2	0.208826	0.792074
BCL2L13	ATP6V1E1	0.208809	0.791531
IPO11	DIMT1	0.208418	0.790988
FAM118B	RPUSD4	0.208312	0.790445
HS2ST1	SELENOF	0.208248	0.789902
ODR4	TPR	0.208126	0.789359
SPCS2	XRRA1	0.207857	0.788817
HAUS2	LRRC57	0.207815	0.788274
CES2	CIAO2B	0.207298	0.787731
PSMB9	PSMB8	0.207174	0.787188
RNF146	ECHDC1	0.2068	0.786645
CNTRL	RAB14	0.206763	0.786102
GTF2H3	EIF2B1	0.206646	0.785559
HHLA3	ANKRD13C	0.206229	0.785016
UBE2E1	NKIRAS1	0.206114	0.784473
CEP57	MTMR2	0.20576	0.783931
WDR25	WARS1	0.205626	0.783388
DRAM1	WASHC3	0.205417	0.782845
EXOSC9	CCNA2	0.204743	0.782302
SLC9A3R2	NTHL1	0.204608	0.781759
LETMD1	CSRNP2	0.204422	0.781216
MDH2	STYXL1	0.204046	0.780673
RNF10	COQ5	0.20393	0.78013
UBTD1	MMS19	0.203818	0.779587
NUCB2	PIK3C2A	0.20284	0.779045
MED17	TAF1D	0.202514	0.778502
NEXN	FUBP1	0.202078	0.777959
RAD51AP1	C12orf4	0.201918	0.777416
BPHL	TUBB2A	0.201629	0.776873
CENPP	NOL8	0.19992	0.77633
ACO2	PHF5A	0.199614	0.775787
ERP29	TMEM116	0.199586	0.775244
MYL5	ATP5ME	0.199386	0.774701
SLIRP	ALKBH1	0.199016	0.774159
CEP57	FAM76B	0.198401	0.773616
TOMM22	JOSD1	0.198396	0.773073
NCAPH2	TYMP	0.197941	0.77253
ING1	CARS2	0.197693	0.771987
NIF3L1	PPIL3	0.197618	0.771444
NAXE	GPATCH4	0.197448	0.770901
SCYL1	LTBP3	0.197262	0.770358
HSPA12B	C20orf27	0.197156	0.769815
SKIV2L	DXO	0.196469	0.769273
UBN1	GLYR1	0.196186	0.76873
LAMP1	GRTP1	0.195648	0.768187
ACAT2	SOD2	0.195052	0.767644
PRR3	GNL1	0.194841	0.767101
SLC38A6	TRMT5	0.194712	0.766558
TMEM69	GPBP1L1	0.194044	0.766015
XRCC6	DESI1	0.193819	0.765472
ZNF283	LYPD5	0.193775	0.764929
CEP63	ANAPC13	0.193504	0.764387
CNST	TFB2M	0.193344	0.763844
MCM8	TRMT6	0.193185	0.763301
TRIM28	CHMP2A	0.19289	0.762758
ETFDH	PPID	0.192748	0.762215
XRCC4	TMEM167A	0.192716	0.761672
INO80E	HIRIP3	0.192169	0.761129
FAAP24	CEP89	0.190687	0.760586
SLC39A7	RXRB	0.190314	0.760043
PGAM1	RRP12	0.190245	0.759501
KATNB1	KIFC3	0.190185	0.758958
QRSL1	RTN4IP1	0.190095	0.758415
WDR20	HSP90AA1	0.189295	0.757872
COQ10A	CS	0.189233	0.757329
REC8	IPO4	0.189132	0.756786
ARMT1	RMND1	0.188374	0.756243
ORMDL2	SARNP	0.188171	0.7557
MRPS7	GGA3	0.187443	0.755157
ZNF664	CCDC92	0.1874	0.754615
CPSF3	ITGB1BP1	0.187206	0.754072
SLC4A2	CDK5	0.187032	0.753529
TRAPPC13	SGTB	0.186867	0.752986
CRIPT	PIGF	0.185565	0.752443
ANAPC11	PCYT2	0.185018	0.7519
SOWAHC	SEPTIN10	0.184766	0.751357
RND2	VAT1	0.184585	0.750814
YBEY	MCM3AP	0.184373	0.750271
JKAMP	L3HYPDH	0.184276	0.749729
SHLD2	GLUD1	0.183604	0.749186
LAMTOR2	UBQLN4	0.183547	0.748643
GLYCTK	WDR82	0.182791	0.7481
GAPDH	IFFO1	0.182621	0.747557
TWNK	MRPL43	0.182167	0.747014
TMEM43	CHCHD4	0.181966	0.746471
MPST	TST	0.181681	0.745928
CIAO1	TMEM127	0.181614	0.745385
VAMP8	GGCX	0.18068	0.744843
TTC3	PIGP	0.180512	0.7443
RFXANK	BORCS8	0.180291	0.743757
RBFA	TXNL4A	0.179981	0.743214
PEG10	SGCE	0.179678	0.742671
TMEM97	IFT20	0.179644	0.742128
PAXX	CLIC3	0.179517	0.741585
WDR6	DALRD3	0.178899	0.741042
SNRPD3	GUCD1	0.178763	0.740499
BCCIP	UROS	0.178438	0.739957
ARMC7	NT5C	0.177563	0.739414
CDKN2C	FAF1	0.177433	0.738871
AP2A1	FUZ	0.177419	0.738328
ACAD8	THYN1	0.177301	0.737785
ANKIB1	KRIT1	0.177118	0.737242
TPRG1L	WRAP73	0.177029	0.736699
MAP3K3	LIMD2	0.17695	0.736156
TTC19	ZSWIM7	0.176752	0.735613
SLC35A5	ATG3	0.176596	0.735071
RPRD1B	TGM2	0.17645	0.734528
C3orf38	CGGBP1	0.1764	0.733985
G6PC3	HDAC5	0.176282	0.733442
AFMID	TK1	0.176162	0.732899
PPHLN1	YAF2	0.17599	0.732356
NDUFAF8	TEPSIN	0.175907	0.731813
EMID1	RHBDD3	0.175467	0.73127
TACC3	SLBP	0.175429	0.730727
CTU2	PIEZO1	0.17526	0.730185
C1orf122	MTF1	0.17467	0.729642
GALK2	COPS2	0.174578	0.729099
VPS26B	NCAPD3	0.174551	0.728556
RFC5	WSB2	0.174489	0.728013
WDR20	MOK	0.17407	0.72747
SPTAN1	WDR34	0.173866	0.726927
IFT74	PLAA	0.173774	0.726384
VPS16	PCED1A	0.173769	0.725841
RPS21	CABLES2	0.173731	0.725299
TIMM29	YIPF2	0.173725	0.724756
NMT1	PLCD3	0.172845	0.724213
PCYOX1	SNRPG	0.172709	0.72367
ZDHHC16	MMS19	0.172621	0.723127
DARS2	CENPL	0.172418	0.722584
NFKBIB	SIRT2	0.172385	0.722041
TRMT13	SASS6	0.172334	0.721498
CCDC77	KDM5A	0.172049	0.720955
KIAA0586	TIMM9	0.171787	0.720413
NCAPG	DCAF16	0.171712	0.71987
LSM3	XPC	0.171452	0.719327
NDUFA1	RNF113A	0.171069	0.718784
USPL1	HMGB1	0.170981	0.718241
DBF4	SLC25A40	0.170909	0.717698
ATP1B1	NME7	0.170809	0.717155
MRTO4	EMC1	0.170748	0.716612
CNTROB	TRAPPC1	0.17063	0.716069
SIVA1	AKT1	0.170367	0.715527
WDR83	DHPS	0.170331	0.714984
TMEM138	CYB561A3	0.170024	0.714441
SYDE1	ILVBL	0.168981	0.713898
MFSD3	RECQL4	0.168556	0.713355
MAD2L1BP	GTPBP2	0.168422	0.712812
NAA20	CRNKL1	0.168217	0.712269
RPAP2	GLMN	0.168204	0.711726
PGK1	TAF9B	0.167995	0.711183
MAIP1	TYW5	0.167946	0.710641
DCLRE1B	AP4B1	0.167761	0.710098
ATP6V1A	NAA50	0.167376	0.709555
RAMAC	HOMER2	0.16707	0.709012
VPS26B	THYN1	0.166951	0.708469
TNFAIP1	IFT20	0.166509	0.707926
NCBP2AS2	NCBP2	0.166348	0.707383
DDX42	FTSJ3	0.166228	0.70684
RABEPK	HSPA5	0.166152	0.706298
CA13	RBIS	0.166033	0.705755
CIAO1	SNRNP200	0.165633	0.705212
SWI5	GOLGA2	0.165464	0.704669
SS18L1	PSMA7	0.164905	0.704126
PHTF2	TMEM60	0.164432	0.703583
MATR3	SIL1	0.164104	0.70304
EXOSC7	ZDHHC3	0.163893	0.702497
CTNS	SHPK	0.163621	0.701954
PLCB3	BAD	0.163615	0.701412
C12orf75	APPL2	0.163611	0.700869
LRWD1	POLR2J	0.163545	0.700326
USP53	C4orf3	0.163504	0.699783
FANCM	FKBP3	0.163272	0.69924
BYSL	MED20	0.163223	0.698697
FGFR1OP2	INTS13	0.163215	0.698154
APAF1	IKBIP	0.162933	0.697611
SRD5A1	NSUN2	0.162927	0.697068
POLR2B	NOA1	0.16229	0.696526
DNALI1	GNL2	0.161719	0.695983
LRRC45	CENPX	0.161705	0.69544
STRAP	EPS8	0.161478	0.694897
TGS1	TMEM68	0.1613	0.694354
UBR7	GON7	0.16103	0.693811
DDB2	ACP2	0.160865	0.693268
ADORA2B	ZSWIM7	0.160537	0.692725
TRIP10	SH2D3A	0.160357	0.692182
FAM200B	FBXL5	0.160239	0.69164
FCSK	COG4	0.159686	0.691097
SLC66A1	AKR7A2	0.159217	0.690554
ATRAID	SLC5A6	0.15881	0.690011
MOV10	RHOC	0.158445	0.689468
PET100	XAB2	0.158421	0.688925
TDG	C12orf73	0.158269	0.688382
TBXAS1	HIPK2	0.158136	0.687839
TOE1	MUTYH	0.158062	0.687296
GTF2E1	RABL3	0.158004	0.686754
MAT2A	GGCX	0.157986	0.686211
CDC25B	CENPB	0.157463	0.685668
DHX38	TXNL4B	0.156894	0.685125
COA8	BAG5	0.15632	0.684582
FBXL15	CUEDC2	0.156173	0.684039
ARMC6	SUGP2	0.156084	0.683496
RRNAD1	MRPL24	0.156062	0.682953
PMS1	ORMDL1	0.155917	0.68241
GID8	DIDO1	0.155879	0.681868
TM7SF2	ZNHIT2	0.155878	0.681325
MRPS12	SARS2	0.155869	0.680782
MTREX	PLPP1	0.15583	0.680239
NDUFAF6	CCNE2	0.155764	0.679696
CEPT1	DRAM2	0.155702	0.679153
RBMS2	BAZ2A	0.155517	0.67861
SSNA1	ANAPC2	0.15516	0.678067
COQ4	TRUB2	0.154705	0.677524
FSD1	STAP2	0.154622	0.676982
STYX	GNPNAT1	0.154508	0.676439
PSMB4	POGZ	0.154504	0.675896
CDC40	WASF1	0.15449	0.675353
TRIP4	PCLAF	0.154454	0.67481
MMP23B	CDK11B	0.153689	0.674267
ACOT13	C6orf62	0.153556	0.673724
WDR3	GDAP2	0.152818	0.673181
POMT1	UCK1	0.152808	0.672638
RFXANK	NR2C2AP	0.152755	0.672096
CCDC137	OXLD1	0.152648	0.671553
CPSF2	NDUFB1	0.152452	0.67101
RIC8A	SIRT3	0.15216	0.670467
WDR54	AC005041.1	0.152025	0.669924
TMEM199	POLDIP2	0.152021	0.669381
TUBG1	RETREG3	0.151308	0.668838
CDS2	PCNA	0.151234	0.668295
PHF7	BAP1	0.151078	0.667752
NUP85	GGA3	0.150893	0.66721
RNF181	TMEM150A	0.150327	0.666667
ZDHHC2	CNOT7	0.150308	0.666124
GALT	SIGMAR1	0.149043	0.665581
DDX49	HOMER3	0.14867	0.665038
KIF4A	PDZD11	0.148616	0.664495
PLP2	PRICKLE3	0.14847	0.663952
ARL5B	NSUN6	0.14833	0.663409
DMAC2L	L2HGDH	0.147839	0.662866
TCTA	RHOA	0.147624	0.662324
RUVBL2	GYS1	0.147594	0.661781
CACNB3	DDX23	0.147203	0.661238
ETFDH	C4orf46	0.14712	0.660695
SMIM19	SLC20A2	0.146834	0.660152
KLC1	BAG5	0.146586	0.659609
POLK	CERT1	0.146264	0.659066
WDR37	IDI1	0.146215	0.658523
PLXNA3	LAGE3	0.145849	0.65798
VMAC	NDUFA11	0.145785	0.657438
AEBP1	POLD2	0.145614	0.656895
NBEAL1	WDR12	0.145222	0.656352
GRK4	NOP14	0.145196	0.655809
PSMD13	SIRT3	0.144817	0.655266
CCDC157	SF3A1	0.144708	0.654723
SNRPA	C19orf54	0.144322	0.65418
TTC9C	HNRNPUL2	0.144294	0.653637
SCRN3	CIR1	0.144242	0.653094
DNAJC24	IMMP1L	0.144191	0.652552
RRNAD1	ISG20L2	0.143329	0.652009
FADS2	TMEM258	0.142525	0.651466
TAF5	ATP5MD	0.141444	0.650923
SENP5	NCBP2	0.140076	0.65038
MORN2	DHX57	0.139446	0.649837
C1orf50	P3H1	0.139336	0.649294
PXMP2	POLE	0.139214	0.648751
RER1	MORN1	0.139153	0.648208
AGPS	NFE2L2	0.138632	0.647666
TMEM63B	MRPL14	0.138487	0.647123
PDHX	APIP	0.137787	0.64658
ACO1	DDX58	0.137678	0.646037
HSCB	CHEK2	0.137309	0.645494
POLH	XPO5	0.137265	0.644951
UBE3B	KCTD10	0.136959	0.644408
SMCR8	SHMT1	0.136783	0.643865
EAF2	IQCB1	0.136606	0.643322
SMPD1	APBB1	0.136605	0.64278
ITPKC	C19orf54	0.136482	0.642237
C6orf136	DHX16	0.135896	0.641694
ENO3	PFN1	0.135778	0.641151
CHD3	NAA38	0.135597	0.640608
GANC	TMEM87A	0.135509	0.640065
TULP3	FOXM1	0.135366	0.639522
STK16	TUBA4A	0.135216	0.638979
STX3	MRPL16	0.134421	0.638436
NCSTN	COPA	0.134329	0.637894
MED15	KLHL22	0.134218	0.637351
UPRT	ABCB7	0.133908	0.636808
SSBP4	ISYNA1	0.13377	0.636265
ADD1	MFSD10	0.133237	0.635722
GNPAT	C1orf131	0.133199	0.635179
SUPT6H	SDF2	0.133072	0.634636
HTRA4	TM2D2	0.131631	0.634093
ZNF568	ZNF829	0.131358	0.63355
CBY1	FAM227A	0.131025	0.633008
TRAPPC13	TRIM23	0.130865	0.632465
PEBP1	VSIG10	0.130711	0.631922
ABITRAM	ELP1	0.13022	0.631379
RAD9A	PPP1CA	0.130011	0.630836
GNPTG	TSR3	0.129634	0.630293
ARL13B	PROS1	0.129464	0.62975
CKLF	TK2	0.129121	0.629207
AIP	PITPNM1	0.128925	0.628664
RPLP2	PIDD1	0.128659	0.628122
BABAM2	RBKS	0.128634	0.627579
TAF8	CCND3	0.128537	0.627036
RRP1B	HSF2BP	0.128494	0.626493
MBD6	DCTN2	0.128493	0.62595
SGSM2	TSR1	0.12795	0.625407
USP30	ALKBH2	0.127663	0.624864
ATG4D	KRI1	0.127646	0.624321
PTOV1	PNKP	0.127613	0.623779
TCEANC2	TMEM59	0.127461	0.623236
DMTF1	TMEM243	0.127366	0.622693
DKC1	MPP1	0.126937	0.62215
MPHOSPH10	MCEE	0.126885	0.621607
ZNF627	ELOF1	0.126871	0.621064
UBAP1	KIF24	0.126207	0.620521
FAM229B	TUBE1	0.126001	0.619978
VASP	OPA3	0.125992	0.619435
MAPKAPK3	CISH	0.125767	0.618893
PRIMPOL	CASP3	0.125365	0.61835
UTP15	ANKRA2	0.125249	0.617807
DDA1	ABHD8	0.124725	0.617264
SQSTM1	MGAT4B	0.124697	0.616721
CABYR	OSBPL1A	0.124079	0.616178
CMTM3	CMTM4	0.123885	0.615635
RMI1	HNRNPK	0.123606	0.615092
ARPC5L	GOLGA1	0.123537	0.614549
CREB3L4	JTB	0.123272	0.614007
MIA3	AIDA	0.122889	0.613464
HSD11B1L	MICOS13	0.122742	0.612921
PRPF38A	ORC1	0.122683	0.612378
NDUFAF2	ERCC8	0.122446	0.611835
PIBF1	DIS3	0.121957	0.611292
PKN3	ZDHHC12	0.121902	0.610749
RNF121	AP002495.1	0.121775	0.610206
ESCO2	CCDC25	0.121742	0.609663
CPTP	INTS11	0.12124	0.609121
NOC4L	DDX51	0.121239	0.608578
TROAP	C1QL4	0.121177	0.608035
RNF20	PGAP4	0.120764	0.607492
LRRC14	C8orf82	0.12067	0.606949
PQBP1	SLC35A2	0.120472	0.606406
TMEM50A	RSRP1	0.120332	0.605863
GPS1	DUS1L	0.120248	0.60532
FAM210B	AURKA	0.1202	0.604777
PKP3	SIGIRR	0.119778	0.604235
GPX4	SBNO2	0.119677	0.603692
AZIN2	AK2	0.119597	0.603149
FBH1	ANKRD16	0.119331	0.602606
NOL3	KIAA0895L	0.119204	0.602063
SLC48A1	HDAC7	0.119034	0.60152
CAPN3	ZNF106	0.118924	0.600977
ZIK1	ZNF416	0.118722	0.600434
KIF15	KIAA1143	0.118585	0.599891
KNTC1	RSRC2	0.118585	0.599349
PARP3	RRP9	0.118506	0.598806
EME1	MRPL27	0.118364	0.598263
WDYHV1	ATAD2	0.118216	0.59772
MOCS3	DPM1	0.117936	0.597177
MPND	SH3GL1	0.117796	0.596634
HBP1	COG5	0.117418	0.596091
PRR12	NOSIP	0.117004	0.595548
SKIV2L	NELFE	0.116592	0.595005
ATXN7	THOC7	0.116352	0.594463
CRELD2	ALG12	0.116313	0.59392
ZFYVE21	XRCC3	0.116112	0.593377
SFXN2	ARL3	0.116037	0.592834
CREB3L4	SLC39A1	0.116004	0.592291
PRMT7	SLC7A6OS	0.115984	0.591748
ALG1	NAGPA	0.115623	0.591205
AP5M1	EXOC5	0.11555	0.590662
RELL2	HDAC3	0.115504	0.590119
SPATA5	NUDT6	0.115466	0.589577
PLD3	C19orf47	0.114896	0.589034
FOXRED1	SRPRA	0.114791	0.588491
FKBP10	P3H4	0.114302	0.587948
SMTN	SELENOM	0.114117	0.587405
CENPQ	MMUT	0.114036	0.586862
ZNF655	FAM200A	0.113656	0.586319
TOX4	RAB2B	0.113276	0.585776
LRRC46	MRPL10	0.113026	0.585233
KIFC2	CYHR1	0.112986	0.584691
SEMA4B	CIB1	0.112794	0.584148
TMEM175	GAK	0.112729	0.583605
KLHL10	NT5C3B	0.112157	0.583062
KLRG1	M6PR	0.111899	0.582519
AVL9	LSM5	0.111315	0.581976
TIMM22	ABR	0.111243	0.581433
SPRTN	EXOC8	0.110859	0.58089
INPP1	HIBCH	0.110808	0.580347
MFAP3	FAM114A2	0.110747	0.579805
MAFK	TMEM184A	0.110298	0.579262
MRPL54	APBA3	0.110172	0.578719
ADPRM	SCO1	0.11011	0.578176
RPRD1B	TTI1	0.109991	0.577633
NMNAT1	LZIC	0.109933	0.57709
IFIT5	LIPA	0.109464	0.576547
PAAF1	COA4	0.109389	0.576004
ZNF346	UIMC1	0.109031	0.575461
IFI35	VAT1	0.108949	0.574919
SAP30BP	RECQL5	0.108892	0.574376
PGAP2	RHOG	0.108245	0.573833
SMYD5	PRADC1	0.108123	0.57329
JRKL	CCDC82	0.107785	0.572747
C19orf38	TMED1	0.106968	0.572204
RIC8A	BET1L	0.10661	0.571661
PRELID1	RAB24	0.106525	0.571118
GATC	TRIAP1	0.106512	0.570575
ELP4	IMMP1L	0.106446	0.570033
NLN	SGTB	0.106387	0.56949
AP1S1	VGF	0.106339	0.568947
GAS8	DBNDD1	0.106272	0.568404
MPG	RHBDF1	0.106248	0.567861
GTF3C4	DDX31	0.106172	0.567318
PML	STOML1	0.106071	0.566775
CSDC2	PMM1	0.105962	0.566232
MED25	FUZ	0.105884	0.565689
SLC4A1AP	SUPT7L	0.105757	0.565147
LARP7	ZGRF1	0.105533	0.564604
BTD	HACL1	0.105244	0.564061
PSTK	C10orf88	0.104951	0.563518
VTI1A	ZDHHC6	0.104916	0.562975
ATRIP	SHISA5	0.104758	0.562432
ARHGAP45	POLR2E	0.104629	0.561889
KDELR3	DDX17	0.104362	0.561346
FBXO45	WDR53	0.103816	0.560803
TMEM251	MOAP1	0.103798	0.560261
METTL15	KIF18A	0.103725	0.559718
UBFD1	EARS2	0.103577	0.559175
SNRNP25	RHBDF1	0.10353	0.558632
AP2B1	PEX12	0.103427	0.558089
C4orf33	SCLT1	0.103363	0.557546
PCMT1	NUP43	0.103263	0.557003
CLCN3	NEK1	0.103137	0.55646
R3HCC1	LOXL2	0.102669	0.555917
SNAP29	PI4KA	0.102413	0.555375
MRPS18C	HELQ	0.102348	0.554832
PCNT	C21orf58	0.102298	0.554289
NUP188	DOLK	0.102265	0.553746
OFD1	TRAPPC2	0.102213	0.553203
NSD2	NELFA	0.102047	0.55266
MYO7B	LIMS2	0.101775	0.552117
MSH3	DHFR	0.101773	0.551574
USP39	TMEM150A	0.101754	0.551031
PSENEN	U2AF1L4	0.101637	0.550489
MYO9B	HAUS8	0.101503	0.549946
PGAP2	NUP98	0.101425	0.549403
CHTF18	RPUSD1	0.101284	0.54886
TMCO3	DCUN1D2	0.101159	0.548317
ALDH16A1	PIH1D1	0.100816	0.547774
DCAF15	RFX1	0.100797	0.547231
MAU2	SUGP1	0.100726	0.546688
ZSWIM9	LIG1	0.100545	0.546145
MEPCE	ZCWPW1	0.100468	0.545603
ELP2	SLC39A6	0.100341	0.54506
WHAMM	HOMER2	0.100119	0.544517
WDR62	THAP8	0.0997579	0.543974
SHISAL2B	SREK1IP1	0.0997551	0.543431
KDM1B	TPMT	0.0992834	0.542888
KDM1B	DEK	0.0991137	0.542345
TMEM104	NAT9	0.0990818	0.541802
DSTN	BFSP1	0.0990556	0.54126
BRI3	TECPR1	0.098509	0.540717
RPS6KB1	TUBD1	0.0983884	0.540174
FKRP	STRN4	0.0983455	0.539631
KLHL18	KIF9	0.098307	0.539088
ZSWIM3	ACOT8	0.0980781	0.538545
PTPN23	SCAP	0.0980241	0.538002
NDUFAF7	CEBPZ	0.0977571	0.537459
NDOR1	TMEM203	0.0977056	0.536916
DOT1L	AP3D1	0.0976949	0.536374
NR1H3	ACP2	0.0976704	0.535831
NDUFB3	FAM126B	0.0976603	0.535288
TMBIM6	FMNL3	0.0973613	0.534745
ZNF473	VRK3	0.0969256	0.534202
GID4	ATPAF2	0.0967129	0.533659
IZUMO4	MOB3A	0.096555	0.533116
ADCK5	CPSF1	0.0959843	0.532573
PEA15	DCAF8	0.0956555	0.53203
PLCE1	NOC3L	0.095444	0.531488
ARAF	SYN1	0.0952054	0.530945
CNTD1	COA3	0.095181	0.530402
GPR37L1	ARL8A	0.0950996	0.529859
C8G	FBXW5	0.0949464	0.529316
ZNF383	ZNF585B	0.0948005	0.528773
ATM	NPAT	0.0947315	0.52823
CEP95	SMURF2	0.0942634	0.527687
DNAAF5	PRKAR1B	0.0942592	0.527144
CEP44	FBXO8	0.0941828	0.526602
KLHL2	TMEM192	0.0940501	0.526059
DLAT	PIH1D2	0.0939372	0.525516
CD3EAP	PPP1R13L	0.0938839	0.524973
MTX1	THBS3	0.0937707	0.52443
CHAF1A	UBXN6	0.0937187	0.523887
GNPTG	UNKL	0.0936718	0.523344
IFI27L1	DDX24	0.0936227	0.522801
SZRD1	FBXO42	0.0934811	0.522258
MPV17L2	RAB3A	0.0932004	0.521716
TMEM132A	SLC15A3	0.0930245	0.521173
MRPL35	REEP1	0.0929941	0.52063
CNPY4	TAF6	0.0926638	0.520087
PIMREG	PITPNM3	0.0925227	0.519544
RBL2	AKTIP	0.0922567	0.519001
CPT2	CZIB	0.0922199	0.518458
CLBA1	CDCA4	0.0919423	0.517915
IARS2	RAB3GAP2	0.0918829	0.517372
RPS28	KANK3	0.0917285	0.51683
RTN3	C11orf95	0.0917241	0.516287
H2AC6	H2BC4	0.0916788	0.515744
PRKCZ	FAAP20	0.0916059	0.515201
MAST1	DNASE2	0.0914237	0.514658
ERMAP	SVBP	0.0910626	0.514115
B3GALT6	SDF4	0.0906204	0.513572
TP53I13	GIT1	0.0905498	0.513029
PFKM	SENP1	0.0904923	0.512486
GSTZ1	POMT2	0.0901731	0.511944
RPS27A	CLHC1	0.0899021	0.511401
RASSF7	LMNTD2	0.0894994	0.510858
ZMYM1	ZMYM6	0.089187	0.510315
ZCWPW2	AZI2	0.0889561	0.509772
SLC25A46	TMEM232	0.088938	0.509229
NHLRC2	DCLRE1A	0.0883597	0.508686
TMEM208	FHOD1	0.0883091	0.508143
EEF1AKMT3	METTL1	0.0880578	0.5076
NAB2	STAT6	0.0879771	0.507058
PCNX3	MAP3K11	0.0878459	0.506515
POLR3F	DZANK1	0.0874229	0.505972
SETD1B	RHOF	0.0861859	0.505429
PCIF1	ZNF335	0.0860966	0.504886
SFI1	PISD	0.0858295	0.504343
PRPF39	FKBP3	0.0857406	0.5038
PTEN	KLLN	0.0854353	0.503257
C15orf65	CCPG1	0.0853355	0.502714
ZNF687	PI4KB	0.085249	0.502172
HHAT	KCNH1	0.085182	0.501629
SF3A2	PLEKHJ1	0.0847118	0.501086
SPIDR	CEBPD	0.084541	0.500543
HYPK	MFAP1	0.0845076	0.5
CACFD1	SLC2A6	0.0844593	0.499457
ZNF526	DEDD2	0.0841485	0.498914
NACC1	TRMT1	0.0839883	0.498371
GIPC3	TBXA2R	0.0838856	0.497828
MASTL	YME1L1	0.0838814	0.497286
TMEM208	LRRC29	0.083854	0.496743
TMEM69	IPP	0.0834517	0.4962
ARSK	TTC37	0.0833905	0.495657
RHOQ	ATP6V1E2	0.0832047	0.495114
PPP1R7	PASK	0.0831599	0.494571
RUSC2	FAM166B	0.0827696	0.494028
SLC9A6	MMGT1	0.0822325	0.493485
MBD5	ORC4	0.0821142	0.492942
TTC31	CCDC142	0.0821044	0.4924
BRD2	HLA-DMA	0.0817758	0.491857
GDAP1	JPH1	0.0817256	0.491314
DNAJA3	CORO7	0.0815144	0.490771
GPATCH11	HEATR5B	0.0814638	0.490228
DTWD1	FAM227B	0.0812909	0.489685
PPT2	PRRT1	0.0812642	0.489142
CHCHD7	PLAG1	0.0810926	0.488599
LEAP2	AFF4	0.0808556	0.488056
PELI3	MRPL11	0.0806787	0.487514
NLGN2	TMEM256	0.0806773	0.486971
LRRC28	TTC23	0.0806399	0.486428
DGCR8	TRMT2A	0.0803369	0.485885
SLC26A2	TIGD6	0.0802042	0.485342
NFIX	LYL1	0.0797098	0.484799
RGL1	ARPC5	0.079604	0.484256
OSTF1	NMRK1	0.0794189	0.483713
PSKH1	AC040162.1	0.0793145	0.48317
DPYSL2	PNMA2	0.0792146	0.482628
TUG1	MORC2	0.0790792	0.482085
CYFIP2	ADAM19	0.0787906	0.481542
LIPT1	TSGA10	0.0784536	0.480999
BLOC1S1	ITGA7	0.07845	0.480456
PTCD3	POLR1A	0.0783081	0.479913
KREMEN2	PKMYT1	0.077845	0.47937
ACVR2A	ORC4	0.0778226	0.478827
USB1	ZNF319	0.0778053	0.478284
TDP1	EFCAB11	0.0777658	0.477742
LRTOMT	NUMA1	0.0777525	0.477199
LRSAM1	RPL12	0.0776393	0.476656
RNF207	ICMT	0.077298	0.476113
UTP18	MBTD1	0.0771769	0.47557
SPHK2	DBP	0.0771058	0.475027
LMNA	MEX3A	0.0770244	0.474484
POLD3	LIPT2	0.0769542	0.473941
NADSYN1	DHCR7	0.0769348	0.473398
C12orf60	WBP11	0.0768476	0.472856
HEXD	CYBC1	0.0768227	0.472313
INO80E	DOC2A	0.0766048	0.47177
CAPNS1	COX7A1	0.0765479	0.471227
CNOT9	USP37	0.0763813	0.470684
WDFY2	DHRS12	0.0763488	0.470141
STXBP1	NIBAN2	0.0761429	0.469598
ZNF408	ARHGAP1	0.0756659	0.469055
LZTR1	THAP7	0.0754662	0.468512
POFUT1	PLAGL2	0.0754274	0.46797
FAAP24	RHPN2	0.0752956	0.467427
PKP4	CCDC148	0.0749455	0.466884
TSEN54	CASKIN2	0.0747614	0.466341
EMC6	P2RX5-TAX1BP3	0.0747337	0.465798
RNF5	AGER	0.0745487	0.465255
RWDD2A	PGM3	0.0744116	0.464712
ALKBH7	PSPN	0.074339	0.464169
SCP2	ECHDC2	0.0737371	0.463626
ANKRD49	MRE11	0.0737359	0.463084
SYNM	TTC23	0.0737079	0.462541
GNMT	PEX6	0.0735183	0.461998
ADRM1	LAMA5	0.0733911	0.461455
TMEM38A	SMIM7	0.073145	0.460912
GDF11	AC023055.1	0.0730524	0.460369
NIPAL1	NFXL1	0.0728718	0.459826
ZNF382	ZNF529	0.0725701	0.459283
HMGXB3	TIGD6	0.0724688	0.45874
ZDHHC8	CCDC188	0.0720648	0.458198
CCS	CCDC87	0.071864	0.457655
HSPA1A	HSPA1L	0.0718559	0.457112
P2RY11	EIF3G	0.0718436	0.456569
SLC25A25	NAIF1	0.0715974	0.456026
HEXD	OGFOD3	0.071416	0.455483
LRRC61	ACTR3C	0.0714063	0.45494
PLEKHN1	PERM1	0.0712791	0.454397
SDCBP	NSMAF	0.071114	0.453855
IFT122	MBD4	0.070718	0.453312
PTCD2	MRPS27	0.070629	0.452769
FBXO6	MAD2L2	0.0704372	0.452226
WDR54	RTKN	0.0702835	0.451683
TMEM200A	SAMD3	0.0700118	0.45114
STKLD1	SURF4	0.0699432	0.450597
PDGFRL	MTUS1	0.0697848	0.450054
AHSA1	VIPAS39	0.0696186	0.449511
SIMC1	KIAA1191	0.0695281	0.448969
AL136295.5	PSME2	0.0693519	0.448426
DTL	INTS7	0.0692346	0.447883
DNAJB9	PNPLA8	0.0691698	0.44734
SHLD3	TRIM23	0.0691685	0.446797
ATF5	IL4I1	0.0688689	0.446254
NMD3	B3GALNT1	0.0688522	0.445711
CRELD1	PRRT3	0.0687173	0.445168
VEZT	FGD6	0.0685989	0.444625
ZFYVE21	PPP1R13B	0.068267	0.444083
PIGG	ZNF721	0.0680449	0.44354
IER2	STX10	0.0678883	0.442997
SRRD	HPS4	0.0678681	0.442454
HMG20A	PEAK1	0.0678663	0.441911
APOM	BAG6	0.0678234	0.441368
UNC79	BTBD7	0.0677278	0.440825
THAP6	RCHY1	0.067712	0.440282
TMTC3	CEP290	0.0676426	0.439739
LRWD1	ALKBH4	0.0675948	0.439197
TBC1D22B	TMEM217	0.0674315	0.438654
SEC24A	SAR1B	0.0673325	0.438111
DNAJB9	THAP5	0.0673183	0.437568
TCOF1	CD74	0.0671749	0.437025
RAVER2	JAK1	0.0671436	0.436482
ZCCHC17	FABP3	0.0669094	0.435939
TMUB2	ATXN7L3	0.0667372	0.435396
COQ6	FAM161B	0.0667084	0.434853
GAREM2	HADHA	0.0662515	0.434311
KLHL23	CCDC173	0.0659594	0.433768
CNIH2	YIF1A	0.0659112	0.433225
UBN1	PPL	0.0656064	0.432682
GTF2H1	HPS5	0.0654444	0.432139
LLGL1	FLII	0.0653377	0.431596
TRAPPC11	RWDD4	0.0650381	0.431053
GVQW3	THAP12	0.0648539	0.43051
NOP9	DHRS1	0.0647662	0.429967
USP42	CYTH3	0.064591	0.429425
ARL6IP4	PITPNM2	0.0645695	0.428882
LMLN	IQCG	0.0644968	0.428339
IRAK4	PUS7L	0.0640247	0.427796
BNIP3L	PNMA2	0.0639231	0.427253
RNF40	CCDC189	0.0635009	0.42671
PI4K2B	SEPSECS	0.0633734	0.426167
AKIP1	DENND2B	0.063289	0.425624
INPP5F	MCMBP	0.063213	0.425081
INVS	TEX10	0.0631566	0.424539
WDR97	SHARPIN	0.0631532	0.423996
SETDB2	CAB39L	0.0630499	0.423453
SOCS4	WDHD1	0.0630044	0.42291
SCAF1	IRF3	0.0628671	0.422367
C5orf22	DROSHA	0.0628259	0.421824
PAK1IP1	C6orf52	0.0627684	0.421281
KDM4D	CWC15	0.0627294	0.420738
RBM48	PEX1	0.0621114	0.420195
NDUFA3	OSCAR	0.0620989	0.419653
ZNF672	ZNF692	0.0618271	0.41911
PIGB	RAB27A	0.0616195	0.418567
SLC12A5	NCOA5	0.0615147	0.418024
PKIB	SERINC1	0.0612279	0.417481
HSD17B6	PRIM1	0.061162	0.416938
GPR27	EIF4E3	0.0611314	0.416395
LRCH3	IQCG	0.0611295	0.415852
UROD	HECTD3	0.0609256	0.415309
KLHDC9	PFDN2	0.0609209	0.414767
WFIKKN1	METTL26	0.0608604	0.414224
SRRM5	IRGQ	0.0607927	0.413681
OXA1L	SLC7A7	0.0600711	0.413138
ROM1	B3GAT3	0.0596398	0.412595
PPP2R5B	ATG2A	0.0595421	0.412052
TECPR2	CINP	0.0592968	0.411509
BFAR	PARN	0.0590289	0.410966
TMEM175	DGKQ	0.0589981	0.410423
ACSS2	GGT7	0.0588789	0.409881
FERMT3	TRPT1	0.0582758	0.409338
PPP6R2	SBF1	0.0579369	0.408795
RPL7L1	C6orf226	0.0577665	0.408252
ARNTL	BTBD10	0.0577421	0.407709
TSC2	NTHL1	0.0575945	0.407166
EMP3	CCDC114	0.0575159	0.406623
FAM118B	SRPRA	0.0571824	0.40608
ACKR2	HIGD1A	0.0571013	0.405537
TP73	WRAP73	0.0566004	0.404995
CNN1	ELOF1	0.0565826	0.404452
FAM217B	SYCP2	0.0561331	0.403909
ZKSCAN5	ZNF394	0.0561043	0.403366
CRAMP1	IFT140	0.0560527	0.402823
PRPF40B	MCRS1	0.0558843	0.40228
CMTR1	CCDC167	0.0557546	0.401737
ATG4A	COL4A6	0.0557087	0.401194
SPACA9	AK8	0.0557005	0.400651
BIVM	POGLUT2	0.0554514	0.400109
MOSPD2	FANCB	0.0553855	0.399566
LYRM1	ERI2	0.0550845	0.399023
ZNF189	MRPL50	0.0548578	0.39848
MAPK8IP3	NME3	0.0541392	0.397937
ESPN	TNFRSF25	0.0538465	0.397394
METAP1D	SLC25A12	0.0536679	0.396851
ETFRF1	CASC1	0.0533569	0.396308
BROX	AIDA	0.0531201	0.395765
ZNF398	ZNF425	0.0528543	0.395223
ZGPAT	ARFRP1	0.0528142	0.39468
DCTN5	PALB2	0.0526019	0.394137
FOXA3	SYMPK	0.0525934	0.393594
TEN1	ACOX1	0.0525783	0.393051
CAMKMT	PREPL	0.0523983	0.392508
NKAPD1	PIH1D2	0.0521481	0.391965
ZFP91	LPXN	0.0521051	0.391422
TMEM126B	DLG2	0.0520857	0.390879
GSE1	GINS2	0.0517032	0.390337
AVPR2	ARHGAP4	0.051581	0.389794
RAB5B	PMEL	0.0514312	0.389251
SLC31A1	FKBP15	0.0513937	0.388708
ALPK1	TIFA	0.0512756	0.388165
FAM162A	WDR5B	0.0512064	0.387622
NUP188	SH3GLB2	0.0511944	0.387079
CTXN2	MYEF2	0.0509419	0.386536
IDH3A	CIB2	0.0509405	0.385993
CLCNKB	FAM131C	0.0507532	0.385451
ZNF75A	TIGD7	0.0506967	0.384908
ELP5	CLDN7	0.0506859	0.384365
PHRF1	IRF7	0.0506327	0.383822
SHFL	ANGPTL6	0.0503297	0.383279
DNM1	GOLGA2	0.0503251	0.382736
OTUB2	DDX24	0.0502617	0.382193
FPGS	ENG	0.0502526	0.38165
WDR83	MAN2B1	0.0501107	0.381107
TELO2	IFT140	0.0500508	0.380565
MYL5	SLC49A3	0.0500223	0.380022
MLH1	EPM2AIP1	0.0496651	0.379479
CREB3	GBA2	0.049577	0.378936
SNN	TXNDC11	0.0494164	0.378393
PDCD11	CALHM2	0.049337	0.37785
ERAL1	FAM222B	0.0490732	0.377307
LRRC46	SCRN2	0.0488559	0.376764
TMEM79	SMG5	0.0485885	0.376221
ASPHD1	SEZ6L2	0.0485563	0.375679
MAP3K13	EHHADH	0.0484544	0.375136
DGLUCY	RPS6KA5	0.0478369	0.374593
ELMOD3	RETSAT	0.0474764	0.37405
RNFT2	C12orf49	0.047343	0.373507
BGN	HAUS7	0.0473239	0.372964
SRRT	UFSP1	0.0471994	0.372421
TBC1D17	PNKP	0.0470352	0.371878
PIGB	PIGBOS1	0.0470058	0.371336
SCAMP5	RPP25	0.046951	0.370793
C4orf47	UFSP2	0.0469283	0.37025
RMDN2	CYP1B1	0.0467586	0.369707
ITGA2	MOCS2	0.0466089	0.369164
ARID4A	ARMH4	0.0465643	0.368621
MPND	STAP2	0.0465127	0.368078
TADA2B	GRPEL1	0.0464721	0.367535
LIG3	CCT6B	0.0463821	0.366992
EPB41	TMEM200B	0.0463237	0.36645
GAS2	FANCF	0.0462677	0.365907
SYTL1	MAP3K6	0.0460735	0.365364
CDH23	PSAP	0.0457304	0.364821
MEF2A	LYSMD4	0.0455871	0.364278
ANKZF1	ATG9A	0.0455253	0.363735
TAS1R3	DVL1	0.0454029	0.363192
FUNDC2	F8	0.0453702	0.362649
PTER	C1QL3	0.0453252	0.362106
DLST	RPS6KL1	0.04522	0.361564
USP35	GAB2	0.0451761	0.361021
CCDC150	GTF3C3	0.0450167	0.360478
UBE2D4	URGCP	0.0447912	0.359935
NBR1	BRCA1	0.0447232	0.359392
ZSWIM8	NDST2	0.0446996	0.358849
FCF1	AREL1	0.0446523	0.358306
KIAA1522	YARS1	0.0444969	0.357763
KRBOX4	ZNF674	0.0444795	0.35722
DFFB	CEP104	0.0443981	0.356678
MAPK7	B9D1	0.0442456	0.356135
BBS9	RP9	0.044187	0.355592
AIMP2	PMS2	0.0441345	0.355049
NOXA1	EXD3	0.0440678	0.354506
CC2D1A	C19orf57	0.0436946	0.353963
NDE1	MARF1	0.0434751	0.35342
TCEA2	SOX18	0.0434667	0.352877
ZNF174	ZSCAN32	0.0434171	0.352334
IL23A	PAN2	0.0432111	0.351792
IQCH	AAGAB	0.0431679	0.351249
ABHD18	MFSD8	0.043142	0.350706
C12orf29	C12orf50	0.0431062	0.350163
CARM1	YIPF2	0.0429729	0.34962
TATDN3	NSL1	0.0429254	0.349077
PLEKHG4	KCTD19	0.0421344	0.348534
TMIE	ALS2CL	0.0420561	0.347991
PIK3CD	CLSTN1	0.0420481	0.347448
SRR	SMG6	0.0418391	0.346906
PTPA	CRAT	0.0414242	0.346363
NECAB1	C8orf88	0.0414108	0.34582
ARIH2	ARIH2OS	0.0413658	0.345277
SZT2	MED8	0.0413335	0.344734
ANKRD37	LRP2BP	0.0411546	0.344191
DNAJC5G	SLC30A3	0.0410044	0.343648
GTF2H5	SERAC1	0.040935	0.343105
RBM7	C11orf71	0.0407345	0.342562
TUBG2	PLEKHH3	0.0406641	0.34202
UTP14C	NEK5	0.0406569	0.341477
COMT	ARVCF	0.040586	0.340934
TDRD9	ATP5MPL	0.0403411	0.340391
BICRAL	TBCC	0.040118	0.339848
TPCN1	IQCD	0.0400295	0.339305
WASHC4	ALDH1L2	0.0400108	0.338762
MED11	CXCL16	0.0398786	0.338219
DNAH1	BAP1	0.039869	0.337676
LRRC56	HRAS	0.0397127	0.337134
C2orf92	ACTR1B	0.0396615	0.336591
UGP2	VPS54	0.0395304	0.336048
CALM3	PPP5D1	0.0393754	0.335505
SLC12A9	EPHB4	0.0393503	0.334962
CLASRP	ZNF296	0.039148	0.334419
SKP2	LMBRD2	0.039115	0.333876
SNX17	ZNF513	0.0390142	0.333333
ABHD13	LIG4	0.0389698	0.33279
R3HDM1	ZRANB3	0.0389091	0.332248
VRK2	FANCL	0.0387821	0.331705
RPA1	SMYD4	0.0387151	0.331162
MYO15B	RECQL5	0.0386908	0.330619
HMBOX1	INTS9	0.0382342	0.330076
MIB1	ABHD3	0.0378691	0.329533
LRRIQ1	TSPAN19	0.0377839	0.32899
MARCHF5	CPEB3	0.0373779	0.328447
TMEM198	CHPF	0.0373219	0.327904
BRCC3	CMC4	0.0372852	0.327362
DNAH11	CDCA7L	0.0372276	0.326819
KAT7	FAM117A	0.0372118	0.326276
STK36	RNF25	0.036832	0.325733
FAM81A	MYO1E	0.036795	0.32519
ATG13	HARBI1	0.036786	0.324647
SMCR8	TOP3A	0.0367327	0.324104
SWT1	TRMT1L	0.0365591	0.323561
ARHGEF40	NDRG2	0.0365374	0.323018
TRIM46	KRTCAP2	0.0365361	0.322476
GPR89A	PDZK1	0.0364545	0.321933
LRRC27	STK32C	0.036363	0.32139
CHP1	EXD1	0.0362186	0.320847
CTNS	P2RX5-TAX1BP3	0.0361897	0.320304
GIPC2	FUBP1	0.036084	0.319761
SHMT2	NDUFA4L2	0.0360329	0.319218
LSMEM2	IFRD2	0.0359929	0.318675
COPZ1	NFE2	0.0358685	0.318132
POLR2A	ZBTB4	0.0357009	0.31759
LZTS2	PDZD7	0.0356089	0.317047
NUDT17	PIAS3	0.0355708	0.316504
RSRC1	SHOX2	0.0354833	0.315961
URB2	TAF5L	0.0351795	0.315418
INVS	ERP44	0.0350536	0.314875
SLC35A4	APBB3	0.0350258	0.314332
OPA1	ATP13A4	0.0349227	0.313789
SAE1	ZC3H4	0.0349149	0.313246
PHOSPHO2	CCDC173	0.0346904	0.312704
DCP2	MCC	0.0345937	0.312161
RAD51C	TEX14	0.0344017	0.311618
CHPF2	SMARCD3	0.0343053	0.311075
ARV1	TTC13	0.034249	0.310532
ZNF501	KIAA1143	0.0340915	0.309989
EMC4	SLC12A6	0.0339334	0.309446
GABPB2	CDC42SE1	0.0336227	0.308903
ZNF276	VPS9D1	0.0335624	0.30836
DNASE1	SLX4	0.0334496	0.307818
STAG3	GPC2	0.0334427	0.307275
TIGD2	FAM13A	0.0334033	0.306732
STXBP4	COX11	0.0331354	0.306189
PDE3B	PSMA1	0.0330786	0.305646
MEST	COPG2	0.0329934	0.305103
ENO4	HSPA12A	0.0329535	0.30456
PGBD4	EMC7	0.0329011	0.304017
EPHX1	TMEM63A	0.0327721	0.303474
PPIP5K2	GIN1	0.0327522	0.302932
SGSM3	MRTFA	0.0324927	0.302389
PCCA	GGACT	0.032482	0.301846
PINLYP	IRGQ	0.0322647	0.301303
GPN1	CCDC121	0.0322309	0.30076
PLEKHA8	FKBP14	0.0322207	0.300217
RAB39A	SLC35F2	0.0322184	0.299674
PIGL	NCOR1	0.0321774	0.299131
TMEM8B	HINT2	0.0321643	0.298588
FAS	ACTA2	0.032095	0.298046
TXNDC17	KIAA0753	0.0320923	0.297503
HAS3	CHTF8	0.0319985	0.29696
MORF4L1	ADAMTS7	0.0318237	0.296417
APLF	FBXO48	0.0316206	0.295874
ATF7IP	PLBD1	0.0315817	0.295331
POLR1D	LNX2	0.0314772	0.294788
SAMD4B	GMFG	0.03139	0.294245
ARHGEF37	CSNK1A1	0.0313826	0.293702
RAB5A	EFHB	0.0313756	0.29316
NCBP1	TSTD2	0.0313712	0.292617
IL24	FCMR	0.0311353	0.292074
RGP1	GBA2	0.0309075	0.291531
SLC2A4RG	ZBTB46	0.0308824	0.290988
PKN1	PTGER1	0.0307815	0.290445
TJP3	APBA3	0.0306288	0.289902
CDK10	SPATA2L	0.0305535	0.289359
SWSAP1	EPOR	0.0304705	0.288817
EIF3J	SPG11	0.030411	0.288274
PALM2AKAP2	PTPN3	0.0304054	0.287731
GNB2	GIGYF1	0.030363	0.287188
SNX29	NPIPB2	0.0302738	0.286645
GUF1	YIPF7	0.0300041	0.286102
TDG	GLT8D2	0.0298757	0.285559
SNX33	IMP3	0.0298577	0.285016
STKLD1	REXO4	0.0296564	0.284473
ZBTB33	TMEM255A	0.0295675	0.283931
QPCTL	SNRPD2	0.029455	0.283388
ZNF576	IRGQ	0.0293755	0.282845
TMEM94	CASKIN2	0.0292531	0.282302
RUNDC1	PTGES3L	0.0291203	0.281759
TIGD5	PYCR3	0.0291067	0.281216
HPDL	MUTYH	0.0290234	0.280673
TPCN1	SLC8B1	0.0288576	0.28013
SMC4	IFT80	0.0286046	0.279587
METTL25	CCDC59	0.0285342	0.279045
BBOF1	ENTPD5	0.0285255	0.278502
TCN2	PES1	0.0283311	0.277959
ABCD1	BCAP31	0.0282747	0.277416
ASB7	LINS1	0.0281644	0.276873
ALDH5A1	GPLD1	0.0279433	0.27633
BCS1L	ZNF142	0.027747	0.275787
CNTNAP1	EZH1	0.0271823	0.275244
UPF1	CERS1	0.0271486	0.274701
PHGDH	ZNF697	0.027039	0.274159
PSMD8	GGN	0.0270176	0.273616
SPDYA	TRMT61B	0.0268677	0.273073
OPRL1	RGS19	0.0267348	0.27253
REEP6	PCSK4	0.026671	0.271987
ZBTB49	LYAR	0.0265197	0.271444
STK16	GLB1L	0.0264597	0.270901
U2SURP	PAQR9	0.0263896	0.270358
H2AC11	H2BC11	0.0263024	0.269815
ERC1	RAD52	0.0262142	0.269273
TMEM182	MFSD9	0.0261834	0.26873
ADGRV1	LYSMD3	0.0260935	0.268187
DCAF11	NRL	0.0258115	0.267644
AMH	JSRP1	0.0257367	0.267101
DKKL1	TEAD2	0.0252099	0.266558
KIFC2	FOXH1	0.0251972	0.266015
TMEM50A	RHCE	0.0249537	0.265472
NANOS1	EIF3A	0.0248136	0.264929
ZNF540	ZFP30	0.0246467	0.264387
CCNYL1	FZD5	0.024532	0.263844
TSSK3	BSDC1	0.024515	0.263301
ZNF140	ZNF891	0.0245095	0.262758
TMEM187	HCFC1	0.024461	0.262215
EME2	MRPS34	0.0243957	0.261672
CNOT11	TBC1D8	0.0243612	0.261129
BAIAP3	TSR3	0.024167	0.260586
ANLN	KIAA0895	0.0241321	0.260043
PET100	PCP2	0.0237039	0.259501
TJAP1	LRRC73	0.0236828	0.258958
IL11RA	CCL27	0.0234372	0.258415
FKBP1B	WDCP	0.023364	0.257872
THBS4	MTX3	0.0232785	0.257329
PFAS	CTC1	0.0231003	0.256786
SAXO2	EFL1	0.0229742	0.256243
SPATA5L1	GATM	0.0229178	0.2557
TREX1	SHISA5	0.0228864	0.255157
KAT8	PRSS8	0.0228584	0.254615
FIG4	AK9	0.0226806	0.254072
IL34	MTSS2	0.022672	0.253529
GINS1	NINL	0.0225696	0.252986
CAPS	RANBP3	0.022366	0.252443
ENTPD7	COX15	0.0223169	0.2519
CCNDBP1	EPB42	0.022165	0.251357
CCDC22	FOXP3	0.0218975	0.250814
GRN	FAM171A2	0.0218909	0.250271
SLC66A3	ROCK2	0.0217541	0.249729
LIN52	ALDH6A1	0.0217107	0.249186
SLC22A4	P4HA2	0.0214742	0.248643
TAOK2	HIRIP3	0.0212203	0.2481
PRXL2B	MMEL1	0.0211206	0.247557
IDUA	DGKQ	0.0210238	0.247014
IL27RA	PALM3	0.0210225	0.246471
SRPK3	IDH3G	0.0208697	0.245928
BOC	CFAP44	0.0208104	0.245385
RDH5	CD63	0.0203746	0.244843
THAP9	SEC31A	0.0199647	0.2443
POLR2H	CLCN2	0.0198854	0.243757
WBP1	MOGS	0.0198313	0.243214
POLR1C	LRRC73	0.0198166	0.242671
ABI3	PHOSPHO1	0.0197288	0.242128
APEH	MST1	0.0195032	0.241585
NCOA3	SULF2	0.0194974	0.241042
LRRC49	LARP6	0.0194431	0.240499
SUPT6H	PROCA1	0.019399	0.239957
BRCA2	ZAR1L	0.0192457	0.239414
FAM149B1	ECD	0.019244	0.238871
AC008763.2	XAB2	0.0185438	0.238328
MTRR	C5orf49	0.0183765	0.237785
BLOC1S3	TRAPPC6A	0.0183143	0.237242
SLC2A4	YBX2	0.0182371	0.236699
SMPD2	PPIL6	0.0180787	0.236156
LYRM1	DCUN1D3	0.0179715	0.235613
DCAF15	PODNL1	0.01783	0.235071
B4GALT2	SLC6A9	0.0177664	0.234528
TDRD10	UBE2Q1	0.0175842	0.233985
VWA5B2	ALG3	0.0175396	0.233442
GPR62	PCBP4	0.0174864	0.232899
OAZ1	JSRP1	0.0174106	0.232356
LARP1	FAXDC2	0.0172734	0.231813
DNTTIP1	WFDC3	0.0172723	0.23127
FPGT	LRRIQ3	0.0172661	0.230727
PARD6A	ENKD1	0.0172129	0.230185
ARHGAP44	ELAC2	0.0169953	0.229642
ACSS2	GSS	0.0169793	0.229099
NIP7	TMED6	0.0168539	0.228556
HSD3B7	STX1B	0.0168373	0.228013
PPP4C	TBX6	0.0168161	0.22747
OVOL3	POLR2I	0.0167059	0.226927
MARCHF9	CDK4	0.0163872	0.226384
ERAS	PCSK1N	0.0162334	0.225841
DTX3L	PARP9	0.0161336	0.225299
CYB5D2	ZZEF1	0.0160969	0.224756
VPS51	TMEM262	0.0159943	0.224213
HCST	NFKBID	0.0158392	0.22367
DRAXIN	MAD2L2	0.0155701	0.223127
PPARA	CDPF1	0.0154158	0.222584
NSUN3	DHFR2	0.0154052	0.222041
HSD11B2	ATP6V0D1	0.0153487	0.221498
EMILIN2	LPIN2	0.0153413	0.220955
LARGE2	PHF21A	0.0150773	0.220413
BEND6	DST	0.0150279	0.21987
MFSD1	RARRES1	0.0148949	0.219327
POGK	TADA1	0.0148818	0.218784
MINK1	CHRNE	0.0148589	0.218241
FAM133A	NAP1L3	0.0148118	0.217698
ACADSB	IKZF5	0.014752	0.217155
PLEKHG6	TNFRSF1A	0.0145946	0.216612
ABCC3	ANKRD40	0.0145748	0.216069
SMPD2	MICAL1	0.0142992	0.215527
AL121594.1	PPP2R3C	0.0142353	0.214984
TBC1D17	IL4I1	0.0141831	0.214441
LRRC8A	KYAT1	0.0141582	0.213898
ACBD4	PLCD3	0.0141012	0.213355
DYRK4	AKAP3	0.0140003	0.212812
GPSM1	DNLZ	0.0138806	0.212269
PARD6A	ACD	0.0137411	0.211726
RIBC1	SMC1A	0.0135049	0.211183
ARFGAP1	NKAIN4	0.013439	0.210641
ABCC10	DLK2	0.0133909	0.210098
PEX3	ADAT2	0.0133756	0.209555
SHBG	FXR2	0.0133184	0.209012
GAS2L1	RASL10A	0.0133107	0.208469
MRPL32	AC010132.3	0.0131395	0.207926
ARFIP1	TIGD4	0.0129864	0.207383
WDR7	TXNL1	0.0128515	0.20684
MMP11	CHCHD10	0.0127878	0.206298
ZNF10	ZNF891	0.0126749	0.205755
CC2D1A	PODNL1	0.012494	0.205212
ZNF593	AL391650.1	0.0122121	0.204669
CEP57L1	SESN1	0.0121927	0.204126
RPL27A	TRIM66	0.0121639	0.203583
RHOBTB2	TNFRSF10B	0.0121491	0.20304
DSE	TSPYL4	0.0118611	0.202497
RPE	KANSL1L	0.0118148	0.201954
TRIM46	MUC1	0.0116786	0.201412
ZNF710	IDH2	0.011558	0.200869
TNS2	SPRYD3	0.0115231	0.200326
PRORP	PPP2R3C	0.0115033	0.199783
DRC3	TOM1L2	0.0112089	0.19924
MYLPF	TBC1D10B	0.0112065	0.198697
APPL1	HESX1	0.0110388	0.198154
LRP3	SLC7A10	0.0109473	0.197611
SLX4IP	JAG1	0.0108866	0.197068
CPS1	LANCL1	0.0105597	0.196526
RGS9BP	ANKRD27	0.0103555	0.195983
C6orf120	PHF10	0.0103536	0.19544
NTPCR	PCNX2	0.0101278	0.194897
SPRYD4	MIP	0.0100953	0.194354
PPFIA3	C19orf73	0.00999169	0.193811
UBXN2A	ATAD2B	0.00978341	0.193268
NKIRAS2	ZNF385C	0.00958409	0.192725
CCDC102B	TMX3	0.00924667	0.192182
MIER1	WDR78	0.00897726	0.19164
HMGXB3	CSF1R	0.00848968	0.191097
C16orf86	ENKD1	0.00802862	0.190554
ADAL	LCMT2	0.00798307	0.190011
EMC10	FAM71E1	0.00781495	0.189468
CHST7	SLC9A7	0.00778314	0.188925
TOE1	TESK2	0.00771263	0.188382
TSC2	PKD1	0.00766147	0.187839
RELCH	PIGN	0.00729269	0.187296
GDPGP1	CIB1	0.00718098	0.186754
RFXANK	BORCS8-MEF2B	0.00715343	0.186211
PNRC2	SRSF10	0.00706239	0.185668
NAB2	NEMP1	0.00702794	0.185125
AP003108.2	CPSF7	0.00695156	0.184582
PPIE	HPCAL4	0.00661339	0.184039
ALG11	ATP7B	0.00657436	0.183496
EIF3K	MAP4K1	0.00644099	0.182953
HSPA14	CDNF	0.00636192	0.182139
HSPA14	CDNF	0.00636192	0.182139
KIF1C	INCA1	0.00634165	0.181325
DHX38	PMFBP1	0.00632611	0.180782
TCEAL2	TCEAL6	0.00632122	0.180239
PRUNE1	MINDY1	0.00627594	0.179696
TUBB4B	FAM166A	0.00620929	0.179153
TP53I13	ABHD15	0.00608481	0.17861
UNC50	MGAT4A	0.00554935	0.178067
RAB36	RSPH14	0.00535025	0.177524
GRIN1	LRRC26	0.0052661	0.176982
PIKFYVE	IDH1	0.00520442	0.176439
HEBP2	NHSL1	0.00511114	0.175896
SH2D6	CAPG	0.0045914	0.175353
NSD1	RAB24	0.00457682	0.17481
TDRD12	SLC7A9	0.00453764	0.174267
TECPR2	ANKRD9	0.00444226	0.173724
SAMD11	NOC2L	0.00432511	0.173181
ZNF345	ZNF790	0.00430662	0.172638
NT5DC1	TSPYL4	0.00408882	0.172096
STS	PUDP	0.00408428	0.171553
PJVK	PRKRA	0.00399761	0.17101
TMOD2	LYSMD2	0.00399152	0.170467
KIAA1328	TPGS2	0.0039751	0.169924
THOC6	BICDL2	0.00389342	0.169381
EIF4E2	TIGD1	0.00386105	0.168838
TGM4	ZDHHC3	0.00373249	0.168295
CARMIL2	ACD	0.00349052	0.167752
LACC1	CCDC122	0.00318657	0.16721
MSH5-SAPCD1	CLIC1	0.00305729	0.166667
SIM2	HLCS	0.00225949	0.166124
IL17RA	TMEM121B	0.00207726	0.165581
RNF214	PCSK7	0.00200457	0.165038
GGT1	GUCD1	0.00172038	0.164495
TTC21A	GORASP1	0.0013755	0.163952
MICALL1	C22orf23	0.00124708	0.163409
SPNS2	MYBBP1A	0.00123939	0.162866
SAC3D1	NAALADL1	0.00122131	0.162324
ACYP2	PSME4	0.00121821	0.161781
GTPBP3	ANO8	0.00117156	0.161238
SLF1	KIAA0825	0.000696149	0.160695
SELENOO	TUBGCP6	0.000605735	0.160152
ORAI2	ALKBH4	0.000504708	0.159609
EGFL8	AGPAT1	0.000340346	0.159066
PPP1R11	RNF39	0.000298702	0.158523
FAM228B	SF3B6	-7.28e-05	0.15798
CTNS	AC027796.3	-8.47e-05	0.157438
DRC1	OTOF	-0.000688231	0.156623
JMJD7-PLA2G4B	SPTBN5	-0.000688231	0.156623
TARBP2	MAP3K12	-0.000737282	0.155809
H2AC20	H2AC21	-0.000834936	0.155266
TIMM21	FBXO15	-0.000977266	0.154723
CHD1L	FMO5	-0.00115008	0.15418
COL9A3	TCFL5	-0.00123084	0.153637
APOM	C6orf47	-0.00133109	0.153094
COL4A3	COL4A4	-0.00154105	0.15228
PACRG	PRKN	-0.00154105	0.15228
KCNK15	RIMS4	-0.00154593	0.151466
SLC24A1	INTS14	-0.00168743	0.150923
SLX1B	BOLA2	-0.00168756	0.15038
MSH5-SAPCD1	VWA7	-0.00168872	0.149837
LRRC63	LCP1	-0.00174435	0.149294
TDRD10	SHE	-0.00182466	0.14848
MAEL	ILDR2	-0.00182466	0.14848
LST1	NCR3	-0.0018821	0.147666
OPTN	CCDC3	-0.00196179	0.147123
EHD3	CAPN14	-0.00207371	0.14658
UNC5A	HK3	-0.00229676	0.146037
DTX1	RASAL1	-0.00236093	0.145494
GFY	SLC17A7	-0.00252899	0.144951
B4GALNT3	NINJ2	-0.00264763	0.144408
DOK1	M1AP	-0.00276238	0.143865
OTOP2	USH1G	-0.00277732	0.143322
CRLS1	LRRN4	-0.00279676	0.14278
FXYD7	LGI4	-0.00279851	0.142237
CRB3	DENND1C	-0.00304893	0.141694
SAMD15	TMED8	-0.00317975	0.141151
CNKSR2	KLHL34	-0.00325167	0.140608
FXYD3	LGI4	-0.00333592	0.140065
TMEM198	OBSL1	-0.0033871	0.139522
H2BU1	H2AW	-0.00347665	0.138979
MRPL30	MITD1	-0.00353445	0.138436
CDH15	SLC22A31	-0.00356335	0.137894
GCA	IFIH1	-0.00362788	0.137351
OAZ3	MRPL9	-0.0037108	0.136808
PPP1R3F	FOXP3	-0.00377852	0.136265
C9orf43	POLE3	-0.00378985	0.135722
GLIPR1L2	CAPS2	-0.00382429	0.135179
GAS2	SVIP	-0.00393884	0.134636
C3orf80	AC079594.2	-0.00404442	0.134093
DNASE1L2	ECI1	-0.00410865	0.13355
PRKCSH	ELAVL3	-0.0041303	0.133008
ZBTB37	SERPINC1	-0.00413942	0.132465
MAPK8IP2	CHKB	-0.00429761	0.131922
ITPKA	LTK	-0.00439127	0.131379
SLC27A2	ATP8B4	-0.00442506	0.130836
ECT2L	REPS1	-0.00445822	0.130293
FAM98C	RASGRP4	-0.00451862	0.12975
AC005520.3	FAM161B	-0.00454419	0.129207
SLC25A27	CYP39A1	-0.00461392	0.128664
WRN	PURG	-0.00470005	0.128122
MRPL52	SLC7A7	-0.00497914	0.127579
BCKDHA	B3GNT8	-0.00509148	0.127036
KLHL10	KLHL11	-0.00511043	0.126493
ELOVL3	PITX3	-0.00512373	0.12595
NDUFA9	AKAP3	-0.00514969	0.125407
ARL6IP5	LMOD3	-0.00520855	0.124864
TMEM266	NRG4	-0.00539998	0.124321
NOXA1	ENTPD8	-0.00544597	0.123779
AL365205.1	USP49	-0.00563952	0.123236
COL4A5	COL4A6	-0.00565779	0.122693
MYLPF	SEPTIN1	-0.0056827	0.12215
ZNF646	PRSS53	-0.00583532	0.121607
TNK1	PLSCR3	-0.00584689	0.121064
KIAA1324	C1orf194	-0.00585079	0.120521
ALG11	NEK5	-0.00591037	0.119978
MTA3	KCNG3	-0.00595758	0.119435
NFATC3	ESRP2	-0.0059992	0.118893
KIAA2012	SUMO1	-0.00601506	0.11835
BICDL1	RAB35	-0.00601981	0.117807
TNFAIP8L2	LYSMD1	-0.0060491	0.117264
ZBTB7B	DCST2	-0.00606709	0.116721
AMDHD1	CCDC38	-0.0061231	0.116178
BBS4	HIGD2B	-0.00626094	0.115635
CLDN9	CLDN6	-0.00637238	0.115092
GLI1	ARHGAP9	-0.00642034	0.114549
MARK2	RCOR2	-0.00648136	0.114007
ANKZF1	GLB1L	-0.00651735	0.113464
AL121845.3	ARFRP1	-0.00664826	0.112921
CLP1	YPEL4	-0.00668292	0.112378
ZFAND2B	ABCB6	-0.00676251	0.111835
NFKBIB	CCER2	-0.00677956	0.111292
TMEM59L	CRLF1	-0.00685675	0.110749
AP002373.1	C11orf71	-0.00704301	0.110206
FOXL2NB	FOXL2	-0.00706833	0.109663
SPRED3	GGN	-0.00712904	0.109121
THUMPD3	SRGAP3	-0.00720609	0.108578
SIPA1L3	WDR87	-0.00728954	0.108035
CHD3	RNF227	-0.00735452	0.107492
ARHGEF4	FAM168B	-0.00739338	0.106949
H2AC20	H2BC21	-0.00745311	0.106406
PLBD2	SLC8B1	-0.00747229	0.105863
LIN7B	C19orf73	-0.0075346	0.10532
PILRA	ZCWPW1	-0.00763724	0.104777
ADORA1	MYBPH	-0.00763804	0.104235
JKAMP	CCDC175	-0.00767094	0.103692
ATP10D	CORIN	-0.00768507	0.103149
THTPA	ZFHX2	-0.00787828	0.102606
SLC39A5	ANKRD52	-0.00789111	0.102063
CRTC1	COMP	-0.00802817	0.10152
SNORC	NGEF	-0.00804493	0.100977
BGLAP	PAQR6	-0.00811027	0.100434
S1PR3	SHC3	-0.00814884	0.0998914
PLD2	AC233723.1	-0.00819493	0.0993485
TESK1	CD72	-0.0082111	0.0988056
ZACN	SRP68	-0.00825514	0.0982628
UPK2	BCL9L	-0.00834005	0.0977199
PTPN13	MAPK10	-0.00849098	0.097177
FPGT-TNNI3K	LRRIQ3	-0.0085006	0.0966341
TRIM54	UCN	-0.00850475	0.0960912
DDX25	PUS3	-0.0085685	0.0955483
WBP2NL	NAGA	-0.0085977	0.0950054
BHMG1	SIX5	-0.00862093	0.0944625
RPS28	AC010323.1	-0.00863162	0.0939197
DNAJC24	DCDC1	-0.00865777	0.0933768
LTB4R	ADCY4	-0.00868506	0.0928339
PLCD4	ZNF142	-0.00873971	0.092291
ARHGEF40	ZNF219	-0.00874608	0.0917481
CASP8	FLACC1	-0.00875176	0.0912052
ENGASE	RBFOX3	-0.0090671	0.0906623
NCDN	KIAA0319L	-0.00918117	0.0901194
SUGCT	MPLKIP	-0.00922069	0.0895765
PRKCSH	CCDC151	-0.00933922	0.0890337
PHLDB1	TREH	-0.00945924	0.0884908
BUD31	ATP5MF-PTCD1	-0.00948719	0.0879479
ANKRD13B	CORO6	-0.00954598	0.087405
TSNAXIP1	RANBP10	-0.00967094	0.0868621
LNP1	TOMM70	-0.00973815	0.0863192
TAZ	DNASE1L1	-0.00993557	0.0857763
VPS4A	PDF	-0.0100182	0.0852334
TCTA	AMT	-0.010035	0.0846906
SLC37A1	RSPH1	-0.0100696	0.0841477
IQANK1	SCRIB	-0.0100897	0.0836048
LRRC36	KCTD19	-0.0101138	0.0830619
ANXA9	MINDY1	-0.0101331	0.082519
CLDN16	CLDN1	-0.0101616	0.0819761
CALU	OPN1SW	-0.0103452	0.0814332
AC090360.1	TXNL4A	-0.0103659	0.0808903
EPX	MKS1	-0.010396	0.0803474
KCNAB2	CHD5	-0.0105339	0.0798046
SYNGR4	TMEM143	-0.0105554	0.0792617
KIAA0556	GTF3C1	-0.0105685	0.0787188
OPRL1	LKAAEAR1	-0.0106672	0.0781759
VASH2	ANGEL2	-0.0107918	0.077633
RPL36A	BTK	-0.0107962	0.0770901
H2AC13	H2BC13	-0.0110485	0.0765472
ZMYM1	AC114490.2	-0.0110755	0.0760043
ACAD10	BRAP	-0.01115	0.0754615
SLC39A10	DNAH7	-0.0111735	0.0749186
CD52	UBXN11	-0.0112092	0.0743757
LRRC56	LMNTD2	-0.0113709	0.0738328
CDHR3	ATXN7L1	-0.0114398	0.0732899
TBC1D30	GNS	-0.0114988	0.072747
RARB	TOP2B	-0.0115888	0.0722041
USP35	KCTD21	-0.0115908	0.0716612
ESPN	HES2	-0.0116206	0.0711183
SPTBN4	BLVRB	-0.0116736	0.0705755
FAM98B	RASGRP1	-0.0117074	0.0700326
CLSTN3	RBP5	-0.0117096	0.0694897
NEK11	ASTE1	-0.0117168	0.0689468
RAB5IF	SLA2	-0.0117971	0.0684039
DGKA	PMEL	-0.0119667	0.067861
AC092587.1	TSGA10	-0.0119686	0.0673181
ZNF449	ZNF75D	-0.0120799	0.0667752
C18orf54	STARD6	-0.0122606	0.0662324
INKA1	UBA7	-0.0125528	0.0656895
PPT2-EGFL8	PRRT1	-0.0127391	0.0651466
HAGHL	CCDC78	-0.0132179	0.0646037
PPCS	ZMYND12	-0.0132188	0.0640608
JMY	DMGDH	-0.0133854	0.0635179
ZYX	EPHA1	-0.0137399	0.062975
B2M	PATL2	-0.0138122	0.0624321
TOMM20L	TIMM9	-0.0139991	0.0618893
WDR48	SCN11A	-0.0141468	0.0613464
KCTD20	PXT1	-0.0142397	0.0608035
CTSW	FIBP	-0.0142989	0.0602606
ABHD1	PREB	-0.0143554	0.0597177
H2BC15	H1-5	-0.0143701	0.0591748
UQCRQ	GDF9	-0.0144093	0.0586319
DNAAF1	TAF1C	-0.0145309	0.058089
MYH7B	TRPC4AP	-0.0146504	0.0575461
BCL2L2	HOMEZ	-0.0146705	0.0570033
RMI2	PRM3	-0.014696	0.0564604
FBXO36	TRIP12	-0.0148305	0.0559175
ARMC10	NAPEPLD	-0.0149343	0.0553746
LTC4S	MGAT4B	-0.015047	0.0548317
CACNA1H	TPSG1	-0.0150523	0.0542888
DDA1	ANO8	-0.0151497	0.0537459
EAF1	COLQ	-0.0153423	0.053203
MLST8	BRICD5	-0.0153826	0.0526602
FBXL8	TRADD	-0.0154127	0.0521173
CCDC40	TBC1D16	-0.0155335	0.0515744
ADAP2	TEFM	-0.0156009	0.0510315
EHBP1L1	KCNK7	-0.0157891	0.0504886
IL6R	SHE	-0.0158821	0.0499457
RFLNA	CCDC92	-0.0160029	0.0494028
DNAJC16	CASP9	-0.016044	0.0488599
PNMT	PGAP3	-0.0161246	0.048317
ZNF277	DOCK4	-0.0161618	0.0477742
DLGAP2	ERICH1	-0.0162994	0.0472313
PPP2R5B	GPHA2	-0.0164294	0.0466884
POLR2B	IGFBP7	-0.0165135	0.0461455
RNF31	PSME2	-0.0166235	0.0456026
PTK2B	TRIM35	-0.0167497	0.0450597
SPATA17	GPATCH2	-0.0168614	0.0445168
MAP3K10	TTC9B	-0.0171473	0.0439739
CEPT1	DENND2D	-0.0173291	0.0434311
SLX1B	BOLA2-SMG1P6	-0.0174971	0.0428882
VILL	PLCD1	-0.0177229	0.0423453
THTPA	AP1G2	-0.0177548	0.0418024
HIGD1B	EFTUD2	-0.0179292	0.0412595
SLX1A	BOLA2B	-0.0179388	0.0407166
WNK1	RAD52	-0.0179928	0.0401737
PAPLN	NUMB	-0.0180344	0.0396308
PTPN1	RIPOR3	-0.0184135	0.0390879
TARDBP	MASP2	-0.0185231	0.0385451
NDUFA13	TSSK6	-0.0187262	0.0380022
DNAAF1	HSDL1	-0.0188293	0.0374593
RIBC1	HSD17B10	-0.0189361	0.0369164
RAG1	TRAF6	-0.019106	0.0363735
KMT2B	IGFLR1	-0.0191643	0.0358306
COL19A1	LMBRD1	-0.0200259	0.0352877
AMPD3	MTRNR2L8	-0.0204285	0.0347448
SNX21	TNNC2	-0.0205961	0.034202
FASTKD2	MDH1B	-0.0206056	0.0336591
CLCN6	MTHFR	-0.0206239	0.0331162
C2	EHMT2	-0.0210614	0.0325733
UROD	ZSWIM5	-0.0212585	0.0320304
GSKIP	ATG2B	-0.0215186	0.0314875
PRKAA2	PLPP3	-0.021563	0.0309446
C16orf70	B3GNT9	-0.0217179	0.0304017
CATSPERD	LONP1	-0.0218038	0.0298588
SNPH	SDCBP2	-0.0219786	0.029316
RNF123	MST1	-0.0220921	0.0287731
MACO1	RHCE	-0.0222053	0.0282302
ATP2A1	RABEP2	-0.0222961	0.0276873
PHF13	KLHL21	-0.0224656	0.0271444
SHROOM2	GPR143	-0.0225102	0.0266015
NECAB1	TMEM64	-0.0227535	0.0260586
RYR1	MAP4K1	-0.022897	0.0255157
HCN2	POLRMT	-0.0235949	0.0249729
TMEM88	NAA38	-0.0236742	0.02443
STK11	CBARP	-0.0237973	0.0238871
SLC29A4	TNRC18	-0.0239344	0.0233442
CXorf58	APOO	-0.024085	0.0228013
RIOK1	CAGE1	-0.0246317	0.0222584
ACY1	ABHD14B	-0.0246373	0.0217155
GPR137C	TXNDC16	-0.0249227	0.0211726
METTL7B	ITGA7	-0.0250475	0.0206297
MAP1A	TP53BP1	-0.0251059	0.0200869
PLK3	TCTEX1D4	-0.025201	0.019544
ZFYVE9	CC2D1B	-0.0253605	0.0190011
FANK1	DHX32	-0.0258294	0.0184582
HCFC2	GLT8D2	-0.026199	0.0179153
RTEL1-TNFRSF6B	ARFRP1	-0.0267367	0.0173724
MYH7B	GSS	-0.0268007	0.0168295
LIN37	HSPB6	-0.0270199	0.0162866
PROSER3	HSPB6	-0.0270359	0.0157438
MSH5	CLIC1	-0.0271836	0.0152009
SCNN1D	ACAP3	-0.0273412	0.014658
NHLRC3	PROSER1	-0.0273472	0.0141151
RUVBL2	LHB	-0.0276458	0.0135722
ARMC10	FBXL13	-0.0282899	0.0130293
TANGO2	ARVCF	-0.0284516	0.0124864
BRCA2	N4BP2L1	-0.0288686	0.0119435
PTBP1	PLPPR3	-0.0292444	0.0114007
GPBAR1	AAMP	-0.0305476	0.0108578
CCDC86	PTGDR2	-0.0314816	0.0103149
THRSP	NDUFC2	-0.0324286	0.00977199
ZNF646	ZNF668	-0.0326856	0.0092291
BCKDHA	EXOSC5	-0.0332341	0.00868621
SYT11	GON4L	-0.0340502	0.00814332
DDX20	INKA2	-0.0341011	0.00760043
PCED1B	AMIGO2	-0.034198	0.00705755
DCAF17	METTL8	-0.0346144	0.00651466
IL17RB	CHDH	-0.0346336	0.00597177
SCYL2	DEPDC4	-0.0347295	0.00542888
NR2E1	OSTM1	-0.0348616	0.00488599
ZYG11A	ECHDC2	-0.0349441	0.0043431
ANTKMT	CCDC78	-0.0372169	0.00380022
SH3BGR	LCA5L	-0.038902	0.00325733
C6orf120	WDR27	-0.0407378	0.00271444
EML6	RTN4	-0.0412971	0.00217155
ZNF740	CSAD	-0.0474755	0.00162866
BOLA1	H2AC21	-0.0496226	0.00108578
FAM122C	FAM122B	-0.0615273	0.000542888

## Sheet: FT282 cells scRNA-seq
Figure 5-Table Supplement 1.
List of Bidirectional Genes to support Figure 5
forward_gene	reverse_gene	pearson_coeff	pct_rank
RSAD2	CMPK2	0.920274	1
DYNLL1	SRSF9	0.656735	0.999439
PRDX5	TRMT112	0.534033	0.998878
ACTL6A	MRPL47	0.53053	0.998317
TECR	NDUFB7	0.528989	0.997757
RHNO1	FOXM1	0.505093	0.997196
CDC123	NUDT5	0.503284	0.996635
EMC6	TAX1BP3	0.496595	0.996074
GEMIN6	SRSF7	0.49307	0.995513
BUD31	PDAP1	0.481402	0.994952
TMEM70	ELOC	0.481229	0.994391
NDUFS6	MRPL36	0.480941	0.993831
COX4I1	EMC8	0.475442	0.99327
ACAT2	TCP1	0.474377	0.992709
RNF167	PFN1	0.471706	0.992148
NCAPD2	MRPL51	0.46037	0.991587
CBX3	HNRNPA2B1	0.459962	0.991026
TUBA1C	TUBA1A	0.458411	0.990466
MGAT2	RPL36AL	0.457944	0.989905
RAD23A	GADD45GIP1	0.45525	0.989344
PTPN11	RPL6	0.454871	0.988783
PSMB9	PSMB8	0.453625	0.988222
ATP5PB	WDR77	0.446293	0.987661
MRPL32	PSMA2	0.445473	0.9871
ARPC5L	RPL35	0.444073	0.98654
HNRNPA1	CBX5	0.442636	0.985979
CDCA2	KCTD9	0.439663	0.985418
COMMD1	CCT4	0.43915	0.984857
NDUFB9	TATDN1	0.430855	0.984296
MRPL18	TCP1	0.43084	0.983735
SELENOT	SERP1	0.430276	0.983174
TSPAN4	POLR2L	0.429847	0.982614
EIF2S1	ATP6V1D	0.427256	0.982053
MRPL57	SKA3	0.422489	0.981492
UQCRH	LRRC41	0.421744	0.980931
FKBP2	PPP1R14B	0.420344	0.98037
GMPR2	NEDD8	0.415081	0.979809
TMEM138	CYB561A3	0.410636	0.979248
NOP56	IDH3B	0.409228	0.978688
HAUS1	ATP5F1A	0.403505	0.978127
PRR11	SKA2	0.403493	0.977566
CISD2	UBE2D3	0.399491	0.977005
MRPS11	MRPL46	0.39675	0.976444
TBCB	POLR2I	0.395877	0.975883
PGM1	ITGB3BP	0.391099	0.975322
RPL7A	SURF1	0.390774	0.974762
LRRC42	HSPB11	0.388669	0.974201
VAMP8	GGCX	0.38826	0.97364
NDUFB5	MRPL47	0.388259	0.973079
SIVA1	AKT1	0.387606	0.972518
PFDN6	WDR46	0.383024	0.971957
ENOPH1	HNRNPDL	0.37878	0.971397
NDUFB10	RPS2	0.378082	0.970836
ATP5F1C	KIN	0.376774	0.970275
TSPAN4	CHID1	0.376498	0.969714
KIF20A	BRD8	0.374235	0.969153
EIF2AK4	SRP14	0.373709	0.968592
CDKN2C	FAF1	0.373663	0.968031
EEF1B2	NDUFS1	0.373197	0.967471
BCL2L12	IRF3	0.371724	0.96691
RAC3	DCXR	0.371623	0.966349
EIF2S1	PLEK2	0.368444	0.965788
NDUFAF3	IMPDH2	0.368385	0.965227
DDX49	COPE	0.367642	0.964666
ENY2	NUDCD1	0.366187	0.964105
UCHL3	COMMD6	0.366032	0.963545
COMT	TXNRD2	0.363403	0.962984
NIT1	PFDN2	0.362384	0.962423
CWC27	SREK1IP1	0.361237	0.961862
PSME1	EMC9	0.359443	0.961301
ZCCHC17	SNRNP40	0.357551	0.96074
HSP90AB1	SLC35B2	0.357498	0.960179
RO60	GLRX2	0.355846	0.959619
AP3S1	ATG12	0.354525	0.959058
RBFA	TXNL4A	0.353613	0.958497
RPAIN	C1QBP	0.352218	0.957936
TSN	NIFK	0.352131	0.957375
TMX2	MED19	0.352092	0.956814
SUPT5H	RPS16	0.350248	0.956254
TERF2IP	KARS1	0.348948	0.955693
METTL23	SRSF2	0.348047	0.955132
PCYOX1	SNRPG	0.348	0.954571
FAM162A	CCDC58	0.347728	0.95401
PTPA	CRAT	0.346911	0.953449
BORA	MZT1	0.345803	0.952888
EMG1	PHB2	0.345757	0.952328
HMMR	NUDCD2	0.345289	0.951767
EXOSC8	SUPT20H	0.343158	0.951206
JKAMP	L3HYPDH	0.342623	0.950645
SNAPIN	ILF2	0.342031	0.950084
RPF1	GNG5	0.341821	0.949523
PARPBP	NUP37	0.339745	0.948962
MDH2	STYXL1	0.338219	0.948402
PTTG1	SLU7	0.337829	0.947841
TMEM63B	MRPL14	0.337512	0.94728
ISCA2	NPC2	0.337148	0.946719
EXOSC9	CCNA2	0.337073	0.946158
SNRNP25	POLR3K	0.335393	0.945597
MRPL49	FAU	0.334917	0.945036
CPNE3	RMDN1	0.333527	0.944476
FAM200B	FBXL5	0.332417	0.943915
GPX4	SBNO2	0.330658	0.943354
SDHD	TIMM8B	0.330015	0.942793
ARL6IP6	PRPF40A	0.329615	0.942232
DZIP3	CIP2A	0.327638	0.941671
TNFRSF12A	HCFC1R1	0.326966	0.94111
TSEN34	MBOAT7	0.326321	0.94055
NCAPH2	LMF2	0.325725	0.939989
CDC25B	CENPB	0.32487	0.939428
GOLT1B	RECQL	0.323774	0.938867
NAXE	GPATCH4	0.323479	0.938306
SURF2	SURF1	0.323309	0.937745
ARPC4	TADA3	0.322675	0.937185
METTL23	JMJD6	0.320422	0.936624
ATP6V1A	NAA50	0.319758	0.936063
ANAPC11	ALYREF	0.318917	0.935502
RPL36	LONP1	0.318853	0.934941
MGST3	ALDH9A1	0.316304	0.93438
PRPF31	TFPT	0.316017	0.933819
TRAPPC4	RPS25	0.315826	0.933259
FAS	ACTA2	0.314976	0.932698
DPYSL2	PNMA2	0.314669	0.932137
CPSF2	NDUFB1	0.31445	0.931576
COQ9	CIAPIN1	0.314348	0.931015
CREB3	TLN1	0.313072	0.930454
FEN1	TMEM258	0.312962	0.929893
HACD3	INTS14	0.312943	0.929333
ROMO1	RBM39	0.31275	0.928772
LRRC45	CENPX	0.312711	0.928211
APEX1	OSGEP	0.312068	0.92765
FADS2	TMEM258	0.311924	0.927089
PSMC2	DNAJC2	0.311491	0.926528
DBI	C2orf76	0.30816	0.925967
RFXANK	BORCS8	0.307783	0.925407
MGME1	SNX5	0.307662	0.924846
FKBP10	P3H4	0.307619	0.924285
ANAPC11	PCYT2	0.306795	0.923724
AAMDC	RSF1	0.306563	0.923163
RBBP4	ZBTB8OS	0.305849	0.922602
GNL3	GLT8D1	0.305703	0.922042
EIF3I	TMEM234	0.304248	0.921481
SYNGR2	TK1	0.303474	0.92092
CRIPT	PIGF	0.303124	0.920359
LSM3	XPC	0.302695	0.919798
GMPR2	TINF2	0.30205	0.919237
RNF167	SLC25A11	0.30161	0.918676
ORC6	VPS35	0.301539	0.918116
SQSTM1	MGAT4B	0.301396	0.917555
C19orf33	YIF1B	0.301124	0.916994
SON	GART	0.301055	0.916433
RFLNA	CCDC92	0.300477	0.915872
ZDHHC16	EXOSC1	0.298629	0.915311
AGPS	NFE2L2	0.297508	0.91475
GTF3A	MTIF3	0.29746	0.91419
MCRIP2	METTL26	0.297035	0.913629
CDC45	UFD1	0.296384	0.913068
RPS28	NDUFA7	0.295905	0.912507
NUDT22	TRPT1	0.295759	0.911946
CNOT11	RNF149	0.295541	0.911385
MCM4	PRKDC	0.294934	0.910824
UQCR10	ZMAT5	0.294258	0.910264
NUDT1	MRM2	0.293721	0.909703
VPS37A	CNOT7	0.293295	0.909142
BCL2L13	ATP6V1E1	0.291608	0.908581
NKAPD1	TIMM8B	0.290961	0.90802
ZNF664	CCDC92	0.290464	0.907459
BUD23	DNAJC30	0.290316	0.906898
TIMM22	ABR	0.289686	0.906338
FAM216A	VPS29	0.289527	0.905777
BPHL	TUBB2A	0.288872	0.905216
USO1	G3BP2	0.288307	0.904655
OXA1L	SLC7A7	0.287584	0.904094
NELFCD	CTSZ	0.287504	0.903533
RNF34	ANAPC5	0.287327	0.902973
NEK6	PSMB7	0.287177	0.902412
SEC61B	ALG2	0.286553	0.901851
RPS27A	MTIF2	0.285262	0.90129
C1orf122	MTF1	0.284827	0.900729
MVB12A	BST2	0.28351	0.900168
PHF1	CUTA	0.283081	0.899607
TNFAIP1	IFT20	0.281649	0.899047
HSBP1L1	TXNL4A	0.281331	0.898486
ING1	CARS2	0.28109	0.897925
PPHLN1	YAF2	0.281073	0.897364
INO80E	HIRIP3	0.279579	0.896803
DHX30	MAP4	0.279116	0.896242
SDHAF2	CPSF7	0.278217	0.895681
PNKD	AAMP	0.276834	0.895121
MAP7D1	TRAPPC3	0.276654	0.89456
DCP2	MCC	0.276151	0.893999
SNAP23	ZNF106	0.274825	0.893438
NUDT1	SNX8	0.274701	0.892877
PQBP1	SLC35A2	0.27462	0.892316
DNAJA1	APTX	0.273747	0.891755
HTRA2	AUP1	0.273727	0.891195
DBF4	SLC25A40	0.273149	0.890634
PTPMT1	CELF1	0.27207	0.890073
PFKP	PITRM1	0.271637	0.889512
MCUB	CASP6	0.2706	0.888951
HOOK3	RNF170	0.270151	0.88839
MRPL52	SLC7A7	0.269801	0.88783
NUTF2	CENPT	0.269705	0.887269
CDC20	ELOVL1	0.269097	0.886708
FGFR1OP2	INTS13	0.268158	0.886147
TCTA	RHOA	0.267963	0.885586
PAAF1	COA4	0.267877	0.885025
FAM216A	GPN3	0.267625	0.884464
SNX17	EIF2B4	0.267621	0.883904
COPS6	MCM7	0.267313	0.883343
UBE2Z	SNF8	0.266956	0.882782
EML4	COX7A2L	0.265943	0.882221
RABEPK	HSPA5	0.265782	0.88166
TRIP13	BRD9	0.265314	0.881099
TMA7	CCDC51	0.264948	0.880538
CEP63	ANAPC13	0.263318	0.879978
ABCE1	ANAPC10	0.262928	0.879417
NCSTN	COPA	0.262605	0.878856
HDAC1	MARCKSL1	0.262198	0.878295
CHMP5	BAG1	0.262157	0.877734
INPP1	HIBCH	0.260994	0.877173
CCDC85B	FOSL1	0.260663	0.876612
LYRM7	HINT1	0.260657	0.876052
DRAM1	WASHC3	0.260019	0.875491
RPLP2	PIDD1	0.259607	0.87493
VPS26B	THYN1	0.259232	0.874369
DDB2	ACP2	0.259122	0.873808
HMBS	H2AX	0.258995	0.873247
NEXN	FUBP1	0.258892	0.872686
CCT7	PRADC1	0.258645	0.872126
UCK2	TMCO1	0.2583	0.871565
ACOT13	TDP2	0.258006	0.871004
PUSL1	INTS11	0.257673	0.870443
NIF3L1	PPIL3	0.256153	0.869882
ZDHHC2	CNOT7	0.25606	0.869321
HMGA1	SMIM29	0.255874	0.868761
NKTR	SEC22C	0.254929	0.8682
PCNT	C21orf58	0.254171	0.867639
LYPLA2	GALE	0.252327	0.867078
PAICS	PPAT	0.252263	0.866517
SURF2	SURF4	0.251306	0.865956
KIF4A	PDZD11	0.251258	0.865395
ADAM9	TM2D2	0.250628	0.864835
CCNG1	NUDCD2	0.249643	0.864274
OSTF1	NMRK1	0.249426	0.863713
DCAF10	EXOSC3	0.248642	0.863152
IK	NDUFA2	0.248263	0.862591
UBN1	GLYR1	0.248045	0.86203
TDRD6	PLA2G7	0.247753	0.861469
TIMM29	YIPF2	0.247572	0.860909
CCT5	ATPSCKMT	0.24742	0.860348
TOMM22	JOSD1	0.246974	0.859787
HNRNPH2	GLA	0.246819	0.859226
IER2	STX10	0.24575	0.858665
SLC4A2	FASTK	0.245277	0.858104
FXR1	DNAJC19	0.244913	0.857543
NDUFA1	RNF113A	0.244851	0.856983
AGBL5	OST4	0.244472	0.856422
CYB561D2	NPRL2	0.24442	0.855861
TIMM10B	ARFIP2	0.243673	0.8553
RSPRY1	PSME3IP1	0.243599	0.854739
TRIP10	GPR108	0.243489	0.854178
C4orf48	NELFA	0.243102	0.853617
SWI5	GOLGA2	0.242444	0.853057
MVK	MMAB	0.241921	0.852496
PIK3CD	CLSTN1	0.240588	0.851935
HGS	ARL16	0.240492	0.851374
BCCIP	UROS	0.240217	0.850813
DCAF13	SLC25A32	0.239429	0.850252
TYW1	SBDS	0.239205	0.849692
ILK	RRP8	0.238505	0.849131
ARHGEF40	ZNF219	0.238345	0.84857
FZR1	MFSD12	0.237892	0.848009
IFI27L1	DDX24	0.237531	0.847448
RAD17	AK6	0.23712	0.846887
USP53	C4orf3	0.235906	0.846326
C14orf119	ACIN1	0.235823	0.845766
IARS2	RAB3GAP2	0.235681	0.845205
RO60	UCHL5	0.235677	0.844644
TRIM28	CHMP2A	0.235484	0.844083
PTDSS1	MTERF3	0.235178	0.843522
MFSD14A	SASS6	0.234676	0.842961
COA8	BAG5	0.234662	0.8424
CCDC18	TMED5	0.234282	0.84184
GPN1	SUPT7L	0.233995	0.841279
GNPAT	C1orf131	0.233774	0.840718
SLC39A9	ERH	0.232979	0.840157
POLH	XPO5	0.232922	0.839596
CSTF1	AURKA	0.232845	0.839035
KLC1	BAG5	0.2317	0.838474
TGS1	TMEM68	0.231161	0.837914
CXADR	BTG3	0.230986	0.837353
USP14	THOC1	0.230547	0.836792
ACYP2	PSME4	0.230469	0.836231
ANKIB1	KRIT1	0.230324	0.83567
SRSF11	LRRC40	0.229546	0.835109
TACC3	SLBP	0.229408	0.834549
NMD3	B3GALNT1	0.228936	0.833988
DRAP1	C11orf68	0.228246	0.833427
TTC9C	HNRNPUL2	0.228239	0.832866
ESCO2	CCDC25	0.228236	0.832305
GPS1	DUS1L	0.228092	0.831744
NFKBIB	SIRT2	0.227995	0.831183
CPTP	INTS11	0.227795	0.830623
PEA15	DCAF8	0.22742	0.830062
MFSD1	RARRES1	0.227399	0.829501
ZNF207	C17orf75	0.226905	0.82894
PRIMPOL	CENPU	0.226564	0.828379
SYDE1	ILVBL	0.226436	0.827818
DMAP1	ERI3	0.226221	0.827257
CUL4A	PCID2	0.226087	0.826697
MOV10	RHOC	0.226038	0.826136
SERF2	MFAP1	0.225445	0.825575
HIGD2A	NOP16	0.225332	0.825014
FBXL15	CUEDC2	0.224052	0.824453
ACO2	PHF5A	0.223836	0.823892
CCDC84	RPS25	0.223759	0.823331
COL4A3	COL4A4	0.22357	0.822771
LAMTOR2	UBQLN4	0.223392	0.82221
NDC80	METTL4	0.223315	0.821649
RAMAC	HOMER2	0.222824	0.821088
C12orf10	AAAS	0.222529	0.820527
ATG4B	THAP4	0.221806	0.819966
ENO3	PFN1	0.221244	0.819405
C3orf38	CGGBP1	0.221137	0.818845
CDT1	APRT	0.22111	0.818284
R3HCC1	LOXL2	0.220024	0.817723
WDYHV1	ATAD2	0.219331	0.817162
MAT2A	GGCX	0.219272	0.816601
LRR1	RPS29	0.218893	0.81604
NUDT15	SUCLA2	0.218812	0.81548
PHTF2	TMEM60	0.218641	0.814919
EME1	MRPL27	0.218573	0.814358
SCP2	ECHDC2	0.217799	0.813797
WDR20	HSP90AA1	0.217722	0.813236
REEP3	JMJD1C	0.217652	0.812675
PXMP2	POLE	0.217544	0.812114
PKN3	ZDHHC12	0.216781	0.811554
POLR2B	IGFBP7	0.216734	0.810993
HARS2	HARS1	0.216692	0.810432
OGFOD1	NUDT21	0.215604	0.809871
ACOT13	C6orf62	0.21551	0.80931
JARID2	DTNBP1	0.214814	0.808749
PRPF4	CDC26	0.214342	0.808188
CHD3	NAA38	0.213935	0.807628
DDX49	HOMER3	0.213754	0.807067
TCOF1	CD74	0.213462	0.806506
RIC8A	BET1L	0.213175	0.805945
PTOV1	PNKP	0.21316	0.805384
UBL5	FBXL12	0.212676	0.804823
RFXANK	NR2C2AP	0.211752	0.804262
ORMDL2	SARNP	0.211534	0.803702
CRLS1	LRRN4	0.210764	0.803141
PSMB4	POGZ	0.210705	0.80258
MKRN2	RAF1	0.210684	0.802019
APEH	MST1	0.210316	0.801458
ESRRA	TRMT112	0.210219	0.800897
MIA3	AIDA	0.209797	0.800337
NAA35	GOLM1	0.2097	0.799776
SPATA33	CHMP1A	0.209545	0.799215
CENPO	PTRHD1	0.20945	0.798654
WDR54	RTKN	0.209364	0.798093
SEC61A1	MGLL	0.209356	0.797532
BLZF1	NME7	0.209315	0.796971
RNF207	ICMT	0.209199	0.796411
UBAP2L	C1orf43	0.208856	0.79585
CCDC137	OXLD1	0.208381	0.795289
RWDD2A	PGM3	0.208249	0.794728
COL4A5	COL4A6	0.208158	0.794167
TDP1	EFCAB11	0.206905	0.793606
GGPS1	ARID4B	0.206681	0.793045
SHOC2	BBIP1	0.206627	0.792485
MRPS7	MIF4GD	0.206541	0.791924
RNF5	AGPAT1	0.206475	0.791363
STYX	GNPNAT1	0.206098	0.790802
MATR3	SIL1	0.205884	0.790241
TNFAIP1	POLDIP2	0.205832	0.78968
SHLD2	GLUD1	0.205749	0.789119
TULP3	FOXM1	0.205194	0.788559
RITA1	DDX54	0.204773	0.787998
THOC6	HCFC1R1	0.204771	0.787437
ASPHD1	SEZ6L2	0.204757	0.786876
CEP57	MTMR2	0.204561	0.786315
EWSR1	RHBDD3	0.204172	0.785754
RPS18	VPS52	0.204133	0.785193
BNIP3L	PNMA2	0.203731	0.784633
NSA2	GFM2	0.203432	0.784072
PNMT	PGAP3	0.203297	0.783511
CHAF1A	UBXN6	0.2032	0.78295
RPL23A	TLCD1	0.203094	0.782389
TMEM69	GPBP1L1	0.20267	0.781828
DTL	INTS7	0.202393	0.781268
SPG7	ANKRD11	0.202018	0.780707
MRRF	RBM18	0.201687	0.780146
CRELD2	ALG12	0.201563	0.779585
TCEA2	RGS19	0.201338	0.779024
TMEM50A	RSRP1	0.200645	0.778463
POLR2A	ZBTB4	0.200549	0.777902
NCBP2AS2	NCBP2	0.200007	0.777342
ADK	AP3M1	0.199504	0.776781
BAG4	LSM1	0.199333	0.77622
ACADVL	DVL2	0.19933	0.775659
ZNHIT1	PLOD3	0.199198	0.775098
PLP2	PRICKLE3	0.198861	0.774537
RPAIN	NUP88	0.198839	0.773976
KIF20A	CDC23	0.198838	0.773416
NDUFAF5	ESF1	0.197965	0.772855
TDG	C12orf73	0.197778	0.772294
NSDHL	CETN2	0.197682	0.771733
TDG	GLT8D2	0.197479	0.771172
NUDT16L1	ANKS3	0.197255	0.770611
HIF1AN	NDUFB8	0.197169	0.77005
SMTN	SELENOM	0.197017	0.76949
RNF146	ECHDC1	0.196473	0.768929
CHMP4C	ZFAND1	0.195244	0.768368
TAF8	CCND3	0.194881	0.767807
RPS6KB2	CORO1B	0.194793	0.767246
AP5M1	EXOC5	0.19471	0.766685
TTC3	PIGP	0.193744	0.766125
NTPCR	PCNX2	0.193403	0.765564
PPWD1	CENPK	0.192873	0.765003
MED29	PAF1	0.192773	0.764442
ISG15	HES4	0.192715	0.763881
WDR55	HARS1	0.192521	0.76332
BROX	AIDA	0.192496	0.762759
SNX1	CIAO2A	0.192119	0.762199
ADD1	MFSD10	0.192063	0.761638
SLC66A3	ROCK2	0.191458	0.761077
CKS1B	SHC1	0.191132	0.760516
MED17	TAF1D	0.190824	0.759955
UBTD1	MMS19	0.190793	0.759394
RGP1	GBA2	0.190608	0.758833
STK16	TUBA4A	0.190507	0.758273
PINK1	DDOST	0.190318	0.757712
MYO9B	HAUS8	0.190087	0.757151
CES2	CIAO2B	0.190051	0.75659
MIS12	DERL2	0.189627	0.756029
PMS1	ORMDL1	0.189623	0.755468
UNC50	COA5	0.189437	0.754907
FSD1	STAP2	0.189379	0.754347
FAHD1	HAGH	0.188959	0.753786
AIMP2	PMS2	0.188907	0.753225
SLC22A4	P4HA2	0.188715	0.752664
HSF1	DGAT1	0.188601	0.752103
RPS21	CABLES2	0.188339	0.751542
HMG20A	PEAK1	0.188086	0.750981
GALT	SIGMAR1	0.187775	0.750421
FOXRED1	SRPRA	0.187459	0.74986
ARMC6	SUGP2	0.187369	0.749299
NMT1	PLCD3	0.187306	0.748738
SUPT6H	SDF2	0.18676	0.748177
SAMD4B	PAF1	0.186219	0.747616
XRCC6	DESI1	0.185845	0.747056
KDM1A	LUZP1	0.185547	0.746495
DNAJB4	FUBP1	0.18546	0.745934
CDS2	PCNA	0.185156	0.745373
EIF5B	REV1	0.184996	0.744812
TP53I13	GIT1	0.184698	0.744251
SLC4A2	CDK5	0.184685	0.74369
SEC24A	SAR1B	0.184562	0.74313
SMIM19	SLC20A2	0.184069	0.742569
VEZT	FGD6	0.183882	0.742008
SDCCAG8	CEP170	0.183736	0.741447
MASTL	YME1L1	0.183572	0.740886
GLYCTK	WDR82	0.183376	0.740325
CD3EAP	PPP1R13L	0.183303	0.739764
NDUFS3	CELF1	0.183258	0.739204
EIF3B	SNX8	0.18322	0.738643
KDELR3	DDX17	0.182621	0.738082
TCF19	CCHCR1	0.182103	0.737521
SH2B1	TUFM	0.181778	0.73696
SH3BGRL	HMGN5	0.181339	0.736399
ING5	DTYMK	0.180866	0.735838
CNTROB	TRAPPC1	0.180094	0.735278
TPI1	SPSB2	0.17978	0.734717
APEX1	PIP4P1	0.179533	0.734156
ARCN1	IFT46	0.179189	0.733595
RPL7A	MED22	0.179177	0.733034
KIAA1522	YARS1	0.178978	0.732473
SSNA1	ANAPC2	0.178928	0.731913
ATG4A	PSMD10	0.178609	0.731352
TMEM208	FHOD1	0.177918	0.730791
CPSF3	ITGB1BP1	0.177426	0.73023
SEC23IP	MCMBP	0.177346	0.729669
NUDC	GPATCH3	0.177058	0.729108
MOSPD2	FANCB	0.17681	0.728547
UTP23	EIF3H	0.17673	0.727987
NCOA3	SULF2	0.176651	0.727426
PLCB3	BAD	0.176223	0.726865
CREB3L4	JTB	0.175872	0.726304
KIAA1328	TPGS2	0.175541	0.725743
UBE3B	KCTD10	0.175409	0.725182
NUP188	SH3GLB2	0.175377	0.724621
GID8	DIDO1	0.175144	0.724061
GTF2H1	HPS5	0.174485	0.7235
ELP2	SLC39A6	0.17381	0.722939
DKC1	MPP1	0.17368	0.722378
MRTO4	EMC1	0.173142	0.721817
SOWAHC	SEPTIN10	0.172756	0.721256
STRAP	EPS8	0.172692	0.720695
ZNF576	IRGQ	0.172515	0.720135
TM7SF2	ZNHIT2	0.172022	0.719574
HSD11B1L	MICOS13	0.172	0.719013
CKLF	TK2	0.171942	0.718452
KIF15	KIAA1143	0.17189	0.717891
WBP4	ELF1	0.171886	0.71733
RNMT	FAM210A	0.171143	0.716769
AP4M1	MCM7	0.171138	0.716209
SFXN2	ARL3	0.17097	0.715648
BZW2	ANKMY2	0.170752	0.715087
CEPT1	DRAM2	0.170743	0.714526
LARP7	ZGRF1	0.170572	0.713965
PSMC5	SMARCD2	0.170323	0.713404
TMEM199	POLDIP2	0.169697	0.712844
CHPF2	SMARCD3	0.169363	0.712283
GPATCH11	EIF2AK2	0.169307	0.711722
TRAPPC2L	GALNS	0.169301	0.711161
LRRC49	LARP6	0.169291	0.7106
CREB3	GBA2	0.169115	0.710039
RBMS2	BAZ2A	0.169078	0.709478
CCNK	SETD3	0.169038	0.708918
ATRAID	SLC5A6	0.168671	0.708357
TTC19	ZSWIM7	0.168424	0.707796
UGP2	VPS54	0.168331	0.707235
MAP2K1	TIPIN	0.168092	0.706674
TBC1D31	DERL1	0.168055	0.706113
MYL5	ATP5ME	0.167333	0.705552
SS18L1	PSMA7	0.167308	0.704992
COQ4	TRUB2	0.166974	0.704431
TRIP4	PCLAF	0.166711	0.70387
BANF1	EIF1AD	0.166248	0.703309
GTF2H5	SERAC1	0.165316	0.702748
IGHMBP2	MRPL21	0.164736	0.702187
ATG4D	KRI1	0.164637	0.701626
DDX55	EIF2B1	0.164571	0.701066
PDHX	APIP	0.164564	0.700505
PGAP2	RHOG	0.164333	0.699944
IMP4	CCDC115	0.162817	0.699383
VMAC	NDUFA11	0.162725	0.698822
HS2ST1	SELENOF	0.162704	0.698261
LIAS	RPL9	0.162618	0.697701
PDCD11	ATP5MD	0.162409	0.69714
BRI3	TECPR1	0.161966	0.696579
RRNAD1	MRPL24	0.161208	0.696018
NABP2	RNF41	0.160491	0.695457
SPTAN1	WDR34	0.159393	0.694896
XRCC4	TMEM167A	0.159343	0.694335
DDA1	ABHD8	0.159186	0.693775
PGK1	TAF9B	0.15912	0.693214
RNF139	TATDN1	0.158833	0.692653
NSD2	NELFA	0.158707	0.692092
CACNB3	DDX23	0.158541	0.691531
ITGA2	MOCS2	0.158332	0.69097
MCM8	TRMT6	0.158241	0.690409
ACAD8	THYN1	0.157817	0.689849
ALDH16A1	PIH1D1	0.157292	0.689288
ZDHHC16	MMS19	0.156566	0.688727
OPA1	ATP13A4	0.155891	0.688166
PGAM1	RRP12	0.155532	0.687605
ZFYVE21	XRCC3	0.15538	0.687044
POP1	RIDA	0.155183	0.686483
RRP1B	HSF2BP	0.154774	0.685923
FPGT-TNNI3K	LRRIQ3	0.154773	0.685362
MRPL54	APBA3	0.154669	0.684801
VPS26B	NCAPD3	0.154453	0.68424
VRK2	FANCL	0.154428	0.683679
CIAO1	SNRNP200	0.154097	0.683118
NDUFAF8	TEPSIN	0.153602	0.682557
HHLA3	ANKRD13C	0.15357	0.681997
C12orf75	APPL2	0.153403	0.681436
GAPDH	IFFO1	0.153333	0.680875
C4orf33	SCLT1	0.152386	0.680314
SLC66A1	AKR7A2	0.1523	0.679753
NCAPH2	TYMP	0.152203	0.679192
MRPS18B	PPP1R10	0.152115	0.678632
WHAMM	HOMER2	0.15207	0.678071
SDHA	CCDC127	0.152028	0.67751
PAPLN	NUMB	0.151706	0.676949
OXNAD1	DPH3	0.151128	0.676388
RNF10	COQ5	0.15065	0.675827
MPHOSPH10	MCEE	0.150591	0.675266
SMC4	IFT80	0.150457	0.674706
DDX42	FTSJ3	0.150375	0.674145
RELCH	PIGN	0.150356	0.673584
SLC30A7	EXTL2	0.150301	0.673023
PRIMPOL	CASP3	0.150167	0.672462
SENP5	NCBP2	0.150125	0.671901
TSC2	PKD1	0.149725	0.67134
ADPRM	SCO1	0.149538	0.67078
SNAP29	PI4KA	0.149433	0.670219
DGCR8	TRMT2A	0.149333	0.669658
GANC	TMEM87A	0.149302	0.669097
MTREX	DHX29	0.149101	0.668536
ZFPL1	CDCA5	0.148244	0.667975
SLC48A1	HDAC7	0.148153	0.667414
METTL15	KIF18A	0.147986	0.666854
METAP2	USP44	0.147805	0.666293
PRR7	DBN1	0.14773	0.665732
MRPL37	SSBP3	0.147629	0.665171
PIGB	RAB27A	0.147485	0.66461
TMTC3	CEP290	0.147232	0.664049
MPST	TST	0.146882	0.663489
C15orf65	CCPG1	0.146622	0.662928
AP2A1	FUZ	0.146289	0.662367
ETFDH	PPID	0.146244	0.661806
UBE2E1	NKIRAS1	0.145546	0.661245
EGFL7	AGPAT2	0.145424	0.660684
USPL1	HMGB1	0.145406	0.660123
CCT6A	PSPH	0.145268	0.659563
EIF3L	ANKRD54	0.145175	0.659002
UBR7	GON7	0.14484	0.658441
SLC39A7	RXRB	0.144712	0.65788
PEX14	DFFA	0.144699	0.657319
MLX	PSMC3IP	0.144679	0.656758
ACAT2	SOD2	0.144287	0.656197
WDR20	MOK	0.144266	0.655637
BABAM2	RBKS	0.144241	0.655076
MAP3K3	LIMD2	0.144165	0.654515
PET100	XAB2	0.14416	0.653954
DSTN	BFSP1	0.144091	0.653393
KDM1B	DEK	0.143909	0.652832
SLC4A1AP	SUPT7L	0.143851	0.652271
MCM2	TPRA1	0.143516	0.651711
SF3B3	COG4	0.143265	0.65115
MPND	STAP2	0.143198	0.650589
NSMCE2	WASHC5	0.142855	0.650028
KATNB1	KIFC3	0.142825	0.649467
SDCBP	NSMAF	0.142599	0.648906
ROMO1	NFS1	0.142579	0.648345
SLC9A6	MMGT1	0.142432	0.647785
TYW3	CRYZ	0.142318	0.647224
GTF2H3	EIF2B1	0.142317	0.646663
SNRPD3	GUCD1	0.142057	0.646102
PKP4	CCDC148	0.141673	0.645541
SCRN3	CIR1	0.14151	0.64498
PGAP2	NUP98	0.14103	0.64442
ATXN7	THOC7	0.141016	0.643859
KNTC1	RSRC2	0.140817	0.643298
HSCB	CHEK2	0.140419	0.642737
FAAP24	CEP89	0.140178	0.642176
NCAPG	DCAF16	0.139963	0.641615
RMI1	HNRNPK	0.139622	0.641054
USP5	CDCA3	0.139099	0.640494
ZNF277	DOCK4	0.138999	0.639933
POLR2B	NOA1	0.138988	0.639372
COMT	ARVCF	0.138275	0.638811
ORC3	RARS2	0.138256	0.63825
ATM	NPAT	0.13792	0.637689
SLC35A5	ATG3	0.137508	0.637128
PCED1B	AMIGO2	0.137427	0.636568
ADORA2B	ZSWIM7	0.137269	0.636007
NBEAL1	WDR12	0.137056	0.635446
EXOSC7	ZDHHC3	0.137006	0.634885
ARHGEF37	CSNK1A1	0.136384	0.634324
EIF4A2	RFC4	0.136298	0.633763
FAM210B	AURKA	0.136271	0.633202
PTCD3	POLR1A	0.136167	0.632642
ZNF710	IDH2	0.136069	0.632081
INPP5F	MCMBP	0.135986	0.63152
PDSS1	ABI1	0.13577	0.630959
RAD51AP1	C12orf4	0.135387	0.630398
RTN3	C11orf95	0.134517	0.629837
DDX19B	AARS1	0.134458	0.629277
TUG1	MORC2	0.134372	0.628716
CEP57	FAM76B	0.134363	0.628155
AKIP1	DENND2B	0.134338	0.627594
PLEKHA8	FKBP14	0.134292	0.627033
EIF3J	SPG11	0.134219	0.626472
GSE1	GINS2	0.133747	0.625911
RBM10	NDUFB11	0.133551	0.625351
NHLRC3	PROSER1	0.133097	0.62479
AHSA1	VIPAS39	0.133007	0.624229
PARD6A	ACD	0.132553	0.623668
CNN1	ELOF1	0.132294	0.623107
CIAO1	TMEM127	0.132255	0.622546
TMCO3	DCUN1D2	0.131989	0.621985
RELL2	HDAC3	0.131976	0.621425
VMP1	PTRH2	0.131709	0.620864
PLXNA3	LAGE3	0.131654	0.620303
VTI1A	ZDHHC6	0.131351	0.619742
TRAPPC11	RWDD4	0.131027	0.619181
IFT122	MBD4	0.130979	0.61862
NUCB2	PIK3C2A	0.130829	0.618059
EEFSEC	RUVBL1	0.130752	0.617499
KLHL18	KIF9	0.130613	0.616938
SCAF1	IRF3	0.130438	0.616377
XPNPEP3	ST13	0.130405	0.615816
PPME1	C2CD3	0.130279	0.615255
POLK	CERT1	0.130147	0.614694
NADSYN1	DHCR7	0.129929	0.614133
MIB1	ABHD3	0.129674	0.613573
TSEN54	CASKIN2	0.129076	0.613012
DNTTIP1	WFDC3	0.129026	0.612451
CMTR1	CCDC167	0.128295	0.61189
WDR83	DHPS	0.12809	0.611329
SGSM3	MRTFA	0.128056	0.610768
WDR3	GDAP2	0.127603	0.610208
C11orf49	ARFGAP2	0.12715	0.609647
KCTD20	PXT1	0.127097	0.609086
HBP1	COG5	0.127043	0.608525
ELP4	IMMP1L	0.126696	0.607964
RNF214	PCSK7	0.126566	0.607403
ALPK1	TIFA	0.126383	0.606842
NMNAT1	LZIC	0.126273	0.606282
NCDN	KIAA0319L	0.126204	0.605721
PSENEN	U2AF1L4	0.126186	0.60516
WDR25	WARS1	0.125803	0.604599
DNAJB9	PNPLA8	0.124934	0.604038
SRRD	HPS4	0.124836	0.603477
CA13	RBIS	0.124582	0.602916
PRKCZ	FAAP20	0.12439	0.602356
NUP188	DOLK	0.124283	0.601795
C6orf120	PHF10	0.124132	0.601234
SCYL1	LTBP3	0.123854	0.600673
RPS6KB1	TUBD1	0.12376	0.600112
SOCS4	WDHD1	0.123542	0.599551
ARMC7	NT5C	0.123456	0.59899
PML	STOML1	0.123316	0.59843
TATDN3	NSL1	0.123218	0.597869
AVPR2	ARHGAP4	0.12291	0.597308
PDIA2	AXIN1	0.122754	0.596747
CMTM3	CMTM4	0.122483	0.596186
TBP	PSMB1	0.122256	0.595625
CEP295	TAF1D	0.122146	0.595064
ZNF672	ZNF692	0.121556	0.594504
STXBP4	COX11	0.121522	0.593943
SNRNP25	RHBDF1	0.121243	0.593382
SF3A2	PLEKHJ1	0.121176	0.592821
FCF1	AREL1	0.121072	0.59226
POGLUT1	TMEM39A	0.120969	0.591699
PSMG4	TUBB2B	0.120726	0.591139
TRMT13	SASS6	0.120366	0.590578
TMUB2	ATXN7L3	0.120355	0.590017
TMBIM6	FMNL3	0.120281	0.589456
TMEM104	NAT9	0.120091	0.588895
SLC26A2	TIGD6	0.120038	0.588334
ETFDH	C4orf46	0.120027	0.587773
PCNX3	MAP3K11	0.120011	0.587213
CDCA8	C1orf109	0.119709	0.586652
SIM2	HLCS	0.119534	0.586091
RPL7L1	C6orf226	0.119437	0.58553
SPRTN	EXOC8	0.119263	0.584969
NLGN2	TMEM256	0.119261	0.584408
CLCN3	NEK1	0.119152	0.583847
STT3A	FEZ1	0.119059	0.583287
ABHD13	LIG4	0.118717	0.582726
RPRD1B	TTI1	0.118583	0.582165
SSBP4	ISYNA1	0.118457	0.581604
TOX4	RAB2B	0.118384	0.581043
UTP15	ANKRA2	0.117999	0.580482
TECPR2	ANKRD9	0.117972	0.579921
SWSAP1	EPOR	0.117471	0.579361
VASP	OPA3	0.117452	0.5788
LRRC28	TTC23	0.117404	0.578239
NBR1	BRCA1	0.117359	0.577678
MMP23B	CDK11B	0.117108	0.577117
TPCN1	SLC8B1	0.116577	0.576556
ARHGAP45	POLR2E	0.116286	0.575996
CNST	TFB2M	0.115945	0.575435
POLR1D	LNX2	0.115757	0.574874
RNF181	TMEM150A	0.115608	0.574313
NAA20	CRNKL1	0.115244	0.573752
SPHK2	RPL18	0.114817	0.573191
MFAP3	FAM114A2	0.114665	0.57263
NOC4L	DDX51	0.114633	0.57207
CEP95	SMURF2	0.114412	0.571509
CARM1	YIPF2	0.114353	0.570948
CNKSR2	KLHL34	0.114089	0.570387
UPRT	ABCB7	0.113742	0.569826
TAF5	ATP5MD	0.11337	0.569265
C1orf50	P3H1	0.112971	0.568704
RPS3	KLHL35	0.112737	0.568144
MIER1	WDR78	0.112628	0.567583
PPP1R11	RNF39	0.112466	0.567022
KDM4D	CWC15	0.112393	0.566461
ADRM1	LAMA5	0.112351	0.5659
PRMT7	SLC7A6OS	0.112207	0.565339
LYRM1	DCUN1D3	0.111881	0.564778
CNPY4	TAF6	0.111867	0.564218
MRPS12	SARS2	0.111797	0.563657
MAFK	TMEM184A	0.111717	0.563096
PMPCA	ENTR1	0.111412	0.562535
NDUFA3	OSCAR	0.11101	0.561974
MED11	CXCL16	0.110993	0.561413
SLIRP	ALKBH1	0.110434	0.560852
ODR4	TPR	0.11041	0.560292
WDR37	IDI1	0.11029	0.559731
DARS2	CENPL	0.110282	0.55917
ELOVL3	PITX3	0.11024	0.558609
RFC5	WSB2	0.109994	0.558048
WDR6	DALRD3	0.109627	0.557487
SH3BGRL3	UBXN11	0.109585	0.556927
SZRD1	FBXO42	0.109362	0.556366
TREX1	SHISA5	0.109298	0.555805
PEBP1	VSIG10	0.109246	0.555244
APAF1	IKBIP	0.109053	0.554683
SAE1	ZC3H4	0.108872	0.554122
ACO1	DDX58	0.108663	0.553561
METTL25	CCDC59	0.108524	0.553001
SPCS2	XRRA1	0.108477	0.55244
MARCHF5	CPEB3	0.108274	0.551879
TMEM8B	HINT2	0.10823	0.551318
FAM118B	SRPRA	0.108178	0.550757
NDUFAF2	ERCC8	0.108006	0.550196
MORF4L1	ADAMTS7	0.107992	0.549635
SLC35A4	APBB3	0.107896	0.549075
CHTF18	RPUSD1	0.107763	0.548514
CFB	NELFE	0.107665	0.547953
IZUMO4	MOB3A	0.107316	0.547392
DTX3L	PARP9	0.10711	0.546831
SCAMP5	RPP25	0.107038	0.54627
PRELID1	RAB24	0.106799	0.545709
ERAL1	FAM222B	0.106694	0.545149
ABCD1	BCAP31	0.106686	0.544588
PLD3	C19orf47	0.106048	0.544027
PSMG2	SPIRE1	0.105998	0.543466
RUVBL2	GYS1	0.105916	0.542905
POFUT1	PLAGL2	0.105682	0.542344
TPCN1	IQCD	0.105598	0.541784
TANGO2	ARVCF	0.105484	0.541223
ORMDL2	DNAJC14	0.105193	0.540662
CNOT3	LENG1	0.105156	0.540101
ARPC5L	GOLGA1	0.105155	0.53954
QRSL1	RTN4IP1	0.105057	0.538979
UBAP1	KIF24	0.10504	0.538418
SETD1B	RHOF	0.104381	0.537858
PCMT1	NUP43	0.104332	0.537297
SKP2	LMBRD2	0.103769	0.536736
IL34	MTSS2	0.103533	0.536175
CEPT1	DENND2D	0.103418	0.535614
OAZ3	MRPL9	0.102927	0.535053
CPT2	CZIB	0.10291	0.534492
PRPF40B	MCRS1	0.102786	0.533932
ACBD4	PLCD3	0.102591	0.533371
BFAR	PARN	0.102408	0.53281
DNASE1L2	ECI1	0.10232	0.532249
ANKRD49	MRE11	0.102175	0.531688
B3GALT6	SDF4	0.102075	0.531127
TWNK	MRPL43	0.101922	0.530566
BEND6	DST	0.101644	0.530006
REC8	IPO4	0.101494	0.529445
GDF11	AC023055.1	0.101489	0.528884
PRPF38A	ORC1	0.101366	0.528323
COQ10A	CS	0.10127	0.527762
CREB3L4	SLC39A1	0.101125	0.527201
DMTF1	TMEM243	0.100895	0.52664
TMEM175	GAK	0.100734	0.52608
GNPTG	UNKL	0.100323	0.525519
KDM1B	TPMT	0.100243	0.524958
SIMC1	KIAA1191	0.100042	0.524397
CPS1	LANCL1	0.0997526	0.523836
MSH3	DHFR	0.099676	0.523275
BYSL	MED20	0.0996741	0.522715
RPA1	SMYD4	0.0992898	0.522154
DOT1L	AP3D1	0.0992652	0.521593
FBXO36	TRIP12	0.0991631	0.521032
UBE2D4	URGCP	0.0991316	0.520471
MPG	RHBDF1	0.0990707	0.51991
LRRC14	RECQL4	0.0989016	0.519349
BICDL1	RAB35	0.0987565	0.518789
ERP29	TMEM116	0.0987009	0.518228
POMT1	UCK1	0.0986694	0.517667
NDUFAF6	CCNE2	0.0986531	0.517106
MBD6	DCTN2	0.0984954	0.516545
CNTRL	RAB14	0.0984947	0.515984
ADGRE5	DDX39A	0.0980084	0.515423
RHOBTB2	TNFRSF10B	0.0978287	0.514863
TMEM43	CHCHD4	0.0977104	0.514302
NAB2	STAT6	0.0976283	0.513741
FANK1	DHX32	0.0975745	0.51318
R3HDM1	ZRANB3	0.0971118	0.512619
MTREX	PLPP1	0.0970688	0.512058
TADA2B	GRPEL1	0.0970204	0.511497
NACC1	TRMT1	0.0968776	0.510937
MAU2	SUGP1	0.0967737	0.510376
MARS1	DDIT3	0.0965121	0.509815
ZNF655	FAM200A	0.096466	0.509254
ROM1	B3GAT3	0.0964076	0.508693
FAM228B	SF3B6	0.0963508	0.508132
LRRC14	C8orf82	0.0962818	0.507572
GALK2	COPS2	0.0962729	0.507011
C6orf136	DHX16	0.0961324	0.50645
RGL1	ARPC5	0.0960866	0.505889
ELP5	CLDN7	0.0960329	0.505328
TEN1	ACOX1	0.0955401	0.504767
BTD	HACL1	0.0954042	0.504206
PIKFYVE	IDH1	0.0952983	0.503646
CNOT9	USP37	0.0952836	0.503085
CEP44	FBXO8	0.0950322	0.502524
KIFC2	CYHR1	0.0948314	0.501963
CENPP	NOL8	0.094798	0.501402
GPR37L1	ARL8A	0.0946324	0.500841
ATP1B1	NME7	0.0946093	0.50028
LRSAM1	RPL12	0.0944642	0.49972
CYB5D2	ZZEF1	0.0942899	0.499159
ARMT1	RMND1	0.0941089	0.498598
CDK10	SPATA2L	0.0940328	0.498037
HEXD	OGFOD3	0.093872	0.497476
MRPL35	REEP1	0.093863	0.496915
CDC40	WASF1	0.0937802	0.496354
SFI1	PISD	0.0934747	0.495794
MLH1	EPM2AIP1	0.0934509	0.495233
MRPS18C	HELQ	0.0934464	0.494672
PEX3	ADAT2	0.0933571	0.494111
RAD9A	PPP1CA	0.0932131	0.49355
BCS1L	RNF25	0.0931924	0.492989
SUGCT	MPLKIP	0.0931154	0.492428
LRRC61	ACTR3C	0.092911	0.491868
TECPR2	CINP	0.092714	0.491307
GCA	IFIH1	0.0926736	0.490746
UROD	HECTD3	0.0925441	0.490185
PPP6R2	SBF1	0.0923474	0.489624
HEBP2	NHSL1	0.092229	0.489063
PNO1	WDR92	0.0921317	0.488503
SNRPA	C19orf54	0.0920771	0.487942
UTP18	MBTD1	0.0920575	0.487381
MAP1LC3A	PIGU	0.0920301	0.48682
ZNF627	ELOF1	0.0919177	0.486259
RSRC1	SHOX2	0.0917331	0.485698
NDUFB3	FAM126B	0.0916992	0.485137
NIPAL1	NFXL1	0.0915507	0.484577
LRWD1	POLR2J	0.091485	0.484016
IRAK4	PUS7L	0.0914821	0.483455
DNAJC24	IMMP1L	0.0913989	0.482894
ADCK5	CPSF1	0.0911751	0.482333
GPN1	CCDC121	0.0910644	0.481772
DHX38	TXNL4B	0.0909403	0.481211
NLN	SGTB	0.0906707	0.480651
SGSM2	TSR1	0.0903331	0.48009
NCBP1	TSTD2	0.0902941	0.479529
IFI35	VAT1	0.090163	0.478968
TPRG1L	WRAP73	0.0896812	0.478407
RPL27A	TRIM66	0.0896533	0.477846
ARHGEF40	NDRG2	0.0895451	0.477285
RPS27A	CLHC1	0.0894001	0.476725
P2RY11	EIF3G	0.0893463	0.476164
AVL9	LSM5	0.0892986	0.475603
MBD5	ORC4	0.0892809	0.475042
GFER	NOXO1	0.0889352	0.474481
KRBOX4	ZNF674	0.0883988	0.47392
GNPTG	TSR3	0.0882343	0.47336
STX3	MRPL16	0.0881317	0.472799
ACADSB	IKZF5	0.0880616	0.472238
IDH3A	CIB2	0.0877759	0.471677
MORN2	DHX57	0.0876341	0.471116
ZKSCAN5	ZNF394	0.0873562	0.470555
CTNS	TAX1BP3	0.087343	0.469994
DDA1	ANO8	0.0871861	0.469434
LETMD1	CSRNP2	0.0871255	0.468873
KIAA0556	GTF3C1	0.0865153	0.468312
GSKIP	ATG2B	0.0864211	0.467751
UBN1	PPL	0.0863839	0.46719
ANKZF1	ATG9A	0.0863563	0.466629
FKRP	STRN4	0.0862347	0.466068
C9orf85	ABHD17B	0.0862297	0.465508
MOCS3	DPM1	0.0861653	0.464947
CC2D1A	PODNL1	0.0860341	0.464386
PIGL	NCOR1	0.0859394	0.463825
SMYD5	PRADC1	0.0857742	0.463264
RPRD1B	TGM2	0.0857287	0.462703
ZGPAT	ARFRP1	0.0855253	0.462142
NDUFV3	WDR4	0.0854969	0.461582
PHRF1	IRF7	0.0854749	0.461021
LRWD1	ALKBH4	0.0851524	0.46046
KCTD16	YIPF5	0.085126	0.459899
UBXN2A	ATAD2B	0.0850339	0.459338
LACC1	CCDC122	0.084868	0.458777
THAP6	RCHY1	0.0845922	0.458216
PKP3	SIGIRR	0.0842578	0.457656
TMEM97	IFT20	0.0833153	0.457095
WDR7	TXNL1	0.0831494	0.456534
FPGT	LRRIQ3	0.0829492	0.455973
CATSPERD	LONP1	0.0827855	0.455412
PEG10	SGCE	0.082738	0.454851
MPND	SH3GL1	0.0826223	0.454291
GAREM2	HADHA	0.0824686	0.45373
DHX38	PMFBP1	0.0824103	0.453169
TMEM251	MOAP1	0.0822611	0.452608
EMC10	FAM71E1	0.0819528	0.452047
ARSK	TTC37	0.0817735	0.451486
TXNDC17	KIAA0753	0.0816816	0.450925
GPALPP1	NUFIP1	0.081567	0.450365
RIC8A	SIRT3	0.081566	0.449804
C5orf22	DROSHA	0.0810823	0.449243
RMDN2	CYP1B1	0.0810664	0.448682
TMEM94	CASKIN2	0.0810035	0.448121
TAOK2	HIRIP3	0.0805287	0.44756
ENTPD7	COX15	0.0804201	0.446999
LRTOMT	NUMA1	0.0802349	0.446439
ZNF189	MRPL50	0.0800507	0.445878
HMOX2	CDIP1	0.0799773	0.445317
DNAJA3	CORO7	0.0799395	0.444756
MRPS7	GGA3	0.0797998	0.444195
HAUS2	LRRC57	0.0797558	0.443634
PLCE1	NOC3L	0.0794552	0.443073
LIPT1	TSGA10	0.0793511	0.442513
SKIV2L	DXO	0.0790978	0.441952
TUBG1	RETREG3	0.0790456	0.441391
LYRM1	ERI2	0.0789382	0.44083
PRPF39	FKBP3	0.0788955	0.440269
RASSF7	LMNTD2	0.0788539	0.439708
AEBP1	POLD2	0.0787543	0.439148
ITPKC	C19orf54	0.0787072	0.438587
ARNTL	BTBD10	0.0786964	0.438026
MED15	KLHL22	0.0786655	0.437465
GRK4	NOP14	0.0785295	0.436904
C16orf71	ANKS3	0.0781275	0.436343
PRR3	GNL1	0.0777091	0.435782
AIP	PITPNM1	0.077604	0.435222
OPRL1	LKAAEAR1	0.0775958	0.434661
PSMD13	SIRT3	0.0775694	0.4341
SMPD1	APBB1	0.0774683	0.433539
ZNF75A	TIGD7	0.0773516	0.432978
ARV1	TTC13	0.0771562	0.432417
FAM229B	TUBE1	0.0769164	0.431856
CCNYL1	FZD5	0.0768399	0.431296
SGF29	SULT1A2	0.0764979	0.430735
BCKDHA	EXOSC5	0.076407	0.430174
CENPQ	MMUT	0.0759897	0.429613
PPIP5K2	GIN1	0.0759046	0.429052
TBC1D22B	TMEM217	0.0754514	0.428491
ZSWIM8	NDST2	0.0752752	0.42793
RPE	KANSL1L	0.075216	0.42737
PTPN23	SCAP	0.075004	0.426809
RRNAD1	ISG20L2	0.0748616	0.426248
ALKBH7	PSPN	0.0739541	0.425687
CCNDBP1	EPB42	0.073767	0.425126
RNF40	CCDC189	0.0732293	0.424565
SPIDR	CEBPD	0.0731252	0.424004
APOM	C6orf47	0.0730547	0.423444
SRR	SMG6	0.0729133	0.422883
SLC31A1	FKBP15	0.0726175	0.422322
EEF1AKMT3	METTL1	0.072591	0.421761
TRAPPC13	SGTB	0.0725512	0.4212
SNN	TXNDC11	0.072474	0.420639
SNX33	IMP3	0.072468	0.420079
BRCA2	N4BP2L1	0.072407	0.419518
PDCD11	CALHM2	0.0723828	0.418957
STXBP1	NIBAN2	0.0721594	0.418396
RBM7	C11orf71	0.071903	0.417835
RBL2	AKTIP	0.0718411	0.417274
ATG4A	COL4A6	0.0718279	0.416713
MEF2A	LYSMD4	0.071706	0.416153
ATF5	IL4I1	0.0711202	0.415592
H2AC6	H2BC4	0.0706689	0.415031
RNF121	AP002495.1	0.0705889	0.41447
VPS16	PCED1A	0.0703766	0.413909
METAP1D	SLC25A12	0.0702977	0.413348
NOL3	KIAA0895L	0.0702061	0.412787
NHLRC2	DCLRE1A	0.0701087	0.412227
LMNA	MEX3A	0.0700123	0.411666
ACY1	ABHD14B	0.0698809	0.411105
ZNF526	DEDD2	0.0697724	0.410544
TBC1D30	GNS	0.0695313	0.409983
UBFD1	EARS2	0.0694823	0.409422
LRRC61	RARRES2	0.0693527	0.408861
INVS	ERP44	0.0691791	0.408301
TBXAS1	HIPK2	0.0691205	0.40774
PIGB	PIGBOS1	0.068848	0.407179
HAS3	CHTF8	0.0685928	0.406618
KCNAB2	CHD5	0.068075	0.406057
ARL5B	NSUN6	0.0680067	0.405496
TRIM46	MUC1	0.0678198	0.404936
PTPN1	RIPOR3	0.0678002	0.404375
NDE1	MARF1	0.0674501	0.403814
KIAA0586	TIMM9	0.0674014	0.403253
NDUFAF7	CEBPZ	0.0673652	0.402692
CTSW	FIBP	0.0672112	0.402131
LRRC27	STK32C	0.0671541	0.40157
GTF2E1	RABL3	0.0670153	0.40101
FAM162A	WDR5B	0.066996	0.400449
UNC50	MGAT4A	0.066744	0.399888
KLHL2	TMEM192	0.0666445	0.399327
DNAJB9	THAP5	0.0663829	0.398766
ZNF646	ZNF668	0.0662859	0.398205
POLR2C	DOK4	0.0662697	0.397644
CC2D1A	C19orf57	0.0661973	0.397084
CTSA	PLTP	0.0660989	0.396523
SLC37A1	RSPH1	0.0657997	0.395962
RNF123	MST1	0.0657719	0.395401
PPCS	ZMYND12	0.0657643	0.39484
SZT2	MED8	0.0654184	0.394279
PI4K2B	SEPSECS	0.0652083	0.393718
RAVER2	JAK1	0.0650883	0.393158
JRKL	CCDC82	0.0649764	0.392597
SHMT2	NDUFA4L2	0.0648549	0.392036
LIN52	ALDH6A1	0.0646534	0.391475
SNX17	ZNF513	0.0644726	0.390914
FBXL8	TRADD	0.0644685	0.390353
HEXD	CYBC1	0.0644231	0.389792
DFFB	CEP104	0.0642822	0.389232
RNFT2	C12orf49	0.0642785	0.388671
ORAI2	ALKBH4	0.0641608	0.38811
ELMOD3	RETSAT	0.06362	0.387549
HMBOX1	INTS9	0.06341	0.386988
BBS9	RP9	0.0633482	0.386427
LNP1	TOMM70	0.0630276	0.385867
TP53I13	ABHD15	0.0630098	0.385306
FAM118B	RPUSD4	0.0629313	0.384745
AP2B1	PEX12	0.0629257	0.384184
DCAF17	METTL8	0.0626514	0.383623
TOE1	MUTYH	0.0625509	0.383062
WDR48	GORASP1	0.0625121	0.382501
ACSS2	GSS	0.0624912	0.381941
SCYL2	DEPDC4	0.06249	0.38138
WDFY2	DHRS12	0.0624286	0.380819
PPT2-EGFL8	PRRT1	0.0623393	0.380258
LLGL1	FLII	0.0621964	0.379697
GAS8	DBNDD1	0.0620315	0.379136
GTF3C4	DDX31	0.0618599	0.378575
CCDC77	KDM5A	0.0617358	0.378015
DNAJC16	CASP9	0.0616952	0.377454
POLR3F	DZANK1	0.0612042	0.376893
PCIF1	ZNF335	0.0612037	0.376332
FAM149B1	ECD	0.0612031	0.375771
TOE1	TESK2	0.0611346	0.37521
CTU2	PIEZO1	0.0610806	0.374649
AC090360.1	TXNL4A	0.0610504	0.374089
ALG1	NAGPA	0.0608633	0.373528
ANLN	KIAA0895	0.0607449	0.372967
RPAP2	GLMN	0.0604714	0.372406
PFKM	SENP1	0.0604311	0.371845
FANCM	FKBP3	0.0604257	0.371284
HCFC2	GLT8D2	0.0603341	0.370723
USP42	CYTH3	0.0602485	0.370163
S1PR3	SHC3	0.0602156	0.369602
TTC31	CCDC142	0.0601526	0.369041
PPARA	CDPF1	0.060133	0.36848
PARP3	RRP9	0.0601255	0.367919
TMEM132A	SLC15A3	0.0600616	0.367358
ZBTB49	LYAR	0.0600095	0.366798
IFT74	PLAA	0.059902	0.366237
ARHGAP44	ELAC2	0.0595154	0.365676
ZNF473	VRK3	0.0594002	0.365115
SCNN1D	ACAP3	0.0589405	0.364554
GPR137C	TXNDC16	0.0589163	0.363993
HTRA4	TM2D2	0.0587004	0.363432
IPO11	DIMT1	0.0580722	0.362872
TBC1D17	PNKP	0.0580016	0.362311
GVQW3	THAP12	0.0579757	0.36175
BCL2L2	HOMEZ	0.0579464	0.361189
CTU2	RNF166	0.0578868	0.360628
ACVR2A	ORC4	0.0578327	0.360067
POGK	TADA1	0.0578172	0.359506
TMEM198	CHPF	0.0576426	0.358946
ABITRAM	ELP1	0.0571746	0.358385
CA9	TPM2	0.0569897	0.357824
AP002884.2	TIMM8B	0.0566841	0.357263
DNAH1	BAP1	0.056676	0.356702
CYFIP2	ADAM19	0.0565496	0.356141
MAPK8IP3	NME3	0.0564835	0.35558
GID4	ATPAF2	0.0564145	0.35502
SERPINI1	PDCD10	0.0562998	0.354459
WNK1	RAD52	0.0562412	0.353898
PKN1	PTGER1	0.0560449	0.353337
HSD17B6	PRIM1	0.0559596	0.352776
ZYX	EPHA1	0.0559572	0.352215
LZTR1	THAP7	0.0559278	0.351655
MAPK7	B9D1	0.0552971	0.351094
MAD2L1BP	GTPBP2	0.0552931	0.350533
ABCC3	ANKRD40	0.0552904	0.349972
CCDC157	SF3A1	0.0552812	0.349411
OTUB2	DDX24	0.0552684	0.34885
ACSS2	GGT7	0.0552568	0.348289
ZBTB33	TMEM255A	0.0552264	0.347729
NSD1	RAB24	0.0551834	0.347168
GATC	TRIAP1	0.0551218	0.346607
CALM3	PPP5D1	0.0546425	0.346046
SMPD2	MICAL1	0.0546208	0.345485
MTX1	THBS3	0.0545567	0.344924
FCSK	COG4	0.0545439	0.344363
B4GALT2	SLC6A9	0.0545204	0.343803
LRRC46	SCRN2	0.0543331	0.343242
TCN2	PES1	0.0542579	0.342681
PGBD4	EMC7	0.0539125	0.34212
SYT11	GON4L	0.0538351	0.341559
FAM98B	RASGRP1	0.0537225	0.340998
SWT1	TRMT1L	0.0536419	0.340437
C6orf120	WDR27	0.0536223	0.339877
SYNGR4	TMEM143	0.0530907	0.339316
FARS2	LYRM4	0.0528624	0.338755
CLDN16	CLDN1	0.0528145	0.338194
PTK2B	TRIM35	0.0525422	0.337633
MRPL32	AC010132.3	0.0525208	0.337072
CACFD1	SLC2A6	0.0524164	0.336511
SLC2A4RG	ZBTB46	0.0522332	0.335951
URB2	TAF5L	0.0521138	0.33539
GSTZ1	POMT2	0.0518834	0.334829
LRRC8A	KYAT1	0.0517476	0.334268
TCEA2	SOX18	0.0516755	0.333707
ADAL	LCMT2	0.0516611	0.333146
SKIV2L	NELFE	0.0516083	0.332586
EME2	MRPS34	0.0515455	0.332025
C16orf70	B3GNT9	0.0514642	0.331464
HMGXB3	TIGD6	0.0513456	0.330903
SRRM5	IRGQ	0.0511413	0.330342
CTNS	SHPK	0.0510479	0.329781
APPL1	HESX1	0.0510053	0.32922
USB1	ZNF319	0.0509482	0.32866
RER1	MORN1	0.0509356	0.328099
MYH7B	GSS	0.0506331	0.327538
DOK1	M1AP	0.0505629	0.326977
CNTD1	COA3	0.0503101	0.326416
SYNM	TTC23	0.0502162	0.325855
APLF	FBXO48	0.0501965	0.325294
ZNF174	ZSCAN32	0.0501685	0.324734
LRRC46	MRPL10	0.049778	0.324173
ARMC10	NAPEPLD	0.0497109	0.323612
COL6A6	PIK3R4	0.0495078	0.323051
PIGG	ZNF721	0.0494448	0.32249
TAZ	DNASE1L1	0.0493272	0.321929
OFD1	TRAPPC2	0.0493154	0.321368
SLC25A25	NAIF1	0.0493003	0.320808
GNMT	PEX6	0.0491903	0.320247
NANOS1	EIF3A	0.0491558	0.319686
PTPN13	MAPK10	0.049133	0.319125
SPATA5	NUDT6	0.0491284	0.318564
DCAF15	RFX1	0.0491132	0.318003
DSE	TSPYL4	0.0490672	0.317443
CABYR	OSBPL1A	0.0488284	0.316882
GNB2	GIGYF1	0.0482864	0.316321
OPRL1	RGS19	0.0480228	0.31576
GDAP1	JPH1	0.0477776	0.315199
ABHD18	MFSD8	0.047713	0.314638
TRAPPC13	TRIM23	0.0475681	0.314077
SELENOO	TUBGCP6	0.0475046	0.313517
YBEY	MCM3AP	0.0474077	0.312956
TMEM187	HCFC1	0.0473328	0.312395
EPHX1	TMEM63A	0.0473269	0.311834
PSTK	C10orf88	0.0472742	0.311273
AP1S1	VGF	0.0468379	0.310712
SLX4IP	JAG1	0.0467941	0.310151
NR1H3	ACP2	0.0467378	0.309591
PRR12	NOSIP	0.046609	0.30903
ANKRD37	LRP2BP	0.0465483	0.308469
NECAB1	C8orf88	0.0462604	0.307908
ZNF687	PI4KB	0.0462065	0.307347
ACAD10	BRAP	0.0461645	0.306786
ZFYVE21	PPP1R13B	0.0460541	0.306225
ADAP2	TEFM	0.0459267	0.305665
IDUA	DGKQ	0.0454735	0.305104
KIF1C	INCA1	0.0452604	0.304543
CEP57L1	SESN1	0.0452086	0.303982
MTBP	MRPL13	0.0451941	0.303421
DCLRE1B	AP4B1	0.0451847	0.30286
GRN	FAM171A2	0.0449197	0.302299
SPRYD4	MIP	0.0449046	0.301739
DMAC2L	L2HGDH	0.0445326	0.301178
GPBAR1	AAMP	0.0444597	0.300617
XKR9	LACTB2	0.044245	0.300056
ATRIP	SHISA5	0.0441141	0.299495
IFIT5	LIPA	0.04395	0.298934
NUP85	GGA3	0.043506	0.298374
HAGHL	CCDC78	0.0434793	0.297813
PHF13	KLHL21	0.0431554	0.297252
ZSWIM3	ACOT8	0.0430777	0.296691
GINS1	NINL	0.0425553	0.29613
WASHC4	ALDH1L2	0.0420136	0.295569
FAAP24	RHPN2	0.0416647	0.295008
AKAP14	NKAP	0.0415215	0.294448
RHBDL3	C17orf75	0.0414595	0.293887
ARID4A	ARMH4	0.041211	0.293326
ARIH2	ARIH2OS	0.0411036	0.292765
DNASE1	SLX4	0.0409054	0.292204
QPCTL	SNRPD2	0.0409008	0.291643
CLSTN3	RBP5	0.0405258	0.291082
SEMA4B	CIB1	0.0403765	0.290522
VPS51	TMEM262	0.0402634	0.289961
HYPK	MFAP1	0.0400857	0.2894
DTWD1	FAM227B	0.0399809	0.288839
TNK1	PLSCR3	0.0397842	0.288278
PLBD2	SLC8B1	0.0396681	0.287717
CCDC150	GTF3C3	0.0395755	0.287156
DNALI1	GNL2	0.0391288	0.286596
FIG4	AK9	0.0391225	0.286035
WDR48	SCN11A	0.0390387	0.285474
CEP250	GDF5	0.0387073	0.284913
GDPGP1	CIB1	0.0386607	0.284352
WDR54	AC005041.1	0.0383622	0.283791
TMEM88	NAA38	0.0383105	0.283231
LIN7B	C19orf73	0.0382074	0.28267
EGFL8	AGPAT1	0.0381689	0.282109
ANTKMT	CCDC78	0.0381147	0.281548
PPP2R5B	ATG2A	0.0380854	0.280987
ZNF346	UIMC1	0.0379817	0.280426
NOP9	DHRS1	0.0377248	0.279865
MAIP1	TYW5	0.0376739	0.279305
POLD3	LIPT2	0.0376533	0.278744
SLC12A9	EPHB4	0.0375759	0.278183
PLEKHN1	PERM1	0.0375242	0.277622
EMILIN2	LPIN2	0.0374154	0.277061
EMC4	SLC12A6	0.0374094	0.2765
CNOT11	TBC1D8	0.0371972	0.275939
CRAMP1	IFT140	0.0371469	0.275379
PLEKHG6	TNFRSF1A	0.0370858	0.274818
ARL13B	PROS1	0.0367517	0.274257
RAB5IF	SLA2	0.0363145	0.273696
TSC2	NTHL1	0.0362706	0.273135
MED25	FUZ	0.0362465	0.272574
USP39	TMEM150A	0.0360069	0.272013
NKAPD1	PIH1D2	0.0358326	0.271453
PINLYP	IRGQ	0.0357814	0.270892
DGKA	PMEL	0.0357424	0.270331
ATG13	HARBI1	0.0356528	0.26977
MINK1	CHRNE	0.0355799	0.269209
CLASRP	ZNF296	0.0355317	0.268648
COL9A3	TCFL5	0.0349667	0.268087
PDGFRL	MTUS1	0.0347229	0.267527
ZNF345	ZNF790	0.0347057	0.266966
TMEM79	SMG5	0.0345996	0.266405
SYTL1	MAP3K6	0.034411	0.265844
TMEM175	DGKQ	0.0343678	0.265283
TIGD2	FAM13A	0.0343168	0.264722
TMEM38A	SMIM7	0.0342507	0.264162
FBXO6	MAD2L2	0.0340391	0.263601
PIBF1	DIS3	0.0340119	0.26304
TMEM69	IPP	0.0339548	0.262479
ZNF568	ZNF829	0.0337393	0.261918
NDUFA9	AKAP3	0.0335139	0.261357
RND2	VAT1	0.0330437	0.260796
DCAF15	PODNL1	0.0329352	0.260236
PTEN	KLLN	0.0322493	0.259675
PRKAA2	PLPP3	0.0321069	0.259114
UPF1	CERS1	0.0317712	0.258553
UPK2	BCL9L	0.0317398	0.257992
ZFP91	LPXN	0.0315621	0.257431
THAP9	SEC31A	0.0315332	0.25687
DNM1	GOLGA2	0.0314444	0.25631
RAB5A	EFHB	0.0314132	0.255749
SRD5A1	NSUN2	0.0312096	0.255188
PI4K2A	AVPI1	0.031035	0.254627
LEAP2	AFF4	0.0309824	0.254066
PHGDH	ZNF697	0.0307542	0.253505
CDC42EP1	LGALS2	0.0307455	0.252944
SNX29	NPIPB2	0.0307163	0.252384
FBH1	ANKRD16	0.0307141	0.251823
RARB	TOP2B	0.0305407	0.251262
SPTBN4	BLVRB	0.0304662	0.250701
CHST7	SLC9A7	0.0303034	0.25014
ARL6IP4	PITPNM2	0.0301371	0.249579
FKBP1B	WDCP	0.0300427	0.249019
UBE2B	CDKL3	0.0298495	0.248458
BOC	CFAP44	0.0297999	0.247897
SLC9A3R2	NTHL1	0.0296621	0.247336
PET100	PCP2	0.0295187	0.246775
CAPN3	ZNF106	0.0294115	0.246214
TARDBP	MASP2	0.0293327	0.245653
TMEM208	LRRC29	0.0292748	0.245093
WDR83	MAN2B1	0.0292247	0.244532
RNF5	AGER	0.0290611	0.243971
SLC12A5	NCOA5	0.0288855	0.24341
LMLN	IQCG	0.0288219	0.242849
ZSWIM9	LIG1	0.0287798	0.242288
FBXO45	WDR53	0.0285673	0.241727
FAM160A1	GATB	0.028538	0.241167
PLD2	AC233723.1	0.0282711	0.240606
PPFIA3	C19orf73	0.0281452	0.240045
TCTA	AMT	0.0281243	0.239484
LAMP1	GRTP1	0.0281221	0.238923
SHBG	FXR2	0.0276003	0.238362
IQANK1	SCRIB	0.0274568	0.237801
FUNDC2	F8	0.0274464	0.237241
CLBA1	CDCA4	0.0271929	0.23668
AL136295.5	PSME2	0.0271572	0.236119
ATP2A1	RABEP2	0.02711	0.235558
NECAB1	TMEM64	0.0267987	0.234997
KLRG1	M6PR	0.0262524	0.234436
MLST8	BRICD5	0.0262329	0.233875
LRCH3	IQCG	0.0262061	0.233315
SLC38A6	TRMT5	0.0261763	0.232754
MEPCE	ZCWPW1	0.0257851	0.232193
GABPB2	CDC42SE1	0.0256617	0.231632
TAS1R3	DVL1	0.0255679	0.231071
AMPD3	MTRNR2L8	0.0255211	0.23051
SYTL3	EZR	0.0253811	0.22995
PELI3	MRPL11	0.0253251	0.229389
NFKB2	PSD	0.0251522	0.228828
USP35	KCTD21	0.024823	0.228267
FAM122C	FAM122B	0.0246657	0.227706
FEM1B	ITGA11	0.0243796	0.227145
ABCC10	DLK2	0.024216	0.226584
DKKL1	TEAD2	0.0242035	0.226024
NPW	ZNF598	0.0241994	0.225463
BCS1L	ZNF142	0.0240858	0.224902
RUNDC1	PTGES3L	0.0234377	0.224341
PTCD2	MRPS27	0.0234091	0.22378
MAPKAPK3	CISH	0.0233037	0.223219
APOM	BAG6	0.0232926	0.222658
H2BC15	H1-5	0.0225129	0.222098
ZNF740	CSAD	0.022473	0.221537
KAT7	FAM117A	0.0224498	0.220976
TMEM125	EBNA1BP2	0.022362	0.220415
LTC4S	MGAT4B	0.0222359	0.219854
GTPBP3	ANO8	0.0221971	0.219293
NUDT17	PIAS3	0.0219455	0.218732
PARD6A	ENKD1	0.0219345	0.218172
LZTS2	PDZD7	0.0219098	0.217611
NDOR1	TMEM203	0.0218336	0.21705
ATF7IP	PLBD1	0.0217043	0.216489
EIF4E2	TIGD1	0.0215103	0.215928
SLC29A4	TNRC18	0.0211012	0.215367
MMP11	CHCHD10	0.0210192	0.214807
PJVK	PRKRA	0.0208452	0.214246
DLST	RPS6KL1	0.020723	0.213685
SMPD2	PPIL6	0.0206491	0.213124
HSPA1A	HSPA1L	0.0206412	0.212563
MYLPF	SEPTIN1	0.0204804	0.212002
CTXN2	MYEF2	0.0202638	0.211441
PSKH1	AC040162.1	0.0202097	0.210881
BAIAP3	TSR3	0.0201024	0.21032
TMEM198	OBSL1	0.0198625	0.209759
AFMID	TK1	0.0197695	0.209198
ZFAND2B	ABCB6	0.0197677	0.208637
OPTN	CCDC3	0.0194638	0.208076
MARCHF9	CDK4	0.0194201	0.207515
TRIP10	SH2D3A	0.0194133	0.206955
BLOC1S3	TRAPPC6A	0.019377	0.206394
BIVM	POGLUT2	0.0193285	0.205833
PLEKHH1	TMEM229B	0.0189598	0.205272
TNS2	SPRYD3	0.018918	0.204711
ZCWPW2	AZI2	0.0186948	0.20415
TSNAXIP1	RANBP10	0.0186895	0.203589
TCEANC2	TMEM59	0.0186832	0.203029
HSPA14	CDNF	0.0184608	0.202187
HSPA14	CDNF	0.0184608	0.202187
INKA1	UBA7	0.0183435	0.201346
C8G	FBXW5	0.0181227	0.200785
G6PC3	HDAC5	0.0179977	0.200224
DLAT	PIH1D2	0.0179934	0.199663
CSDC2	PMM1	0.0178473	0.199103
ZNF408	ARHGAP1	0.0177226	0.198542
LPIN3	EMILIN3	0.0174491	0.197981
GPSM1	DNLZ	0.0172642	0.19742
KMT2B	IGFLR1	0.0172414	0.196859
BMP6	TXNDC5	0.0172095	0.196298
SLC24A1	INTS14	0.0171938	0.195738
LSMEM2	IFRD2	0.0170682	0.195177
BLOC1S1	ITGA7	0.0165879	0.194616
ZNRF1	LDHD	0.0164822	0.194055
UNC79	BTBD7	0.0164747	0.193494
CBY1	FAM227A	0.0164429	0.192933
COQ6	FAM161B	0.0162665	0.192372
C14orf178	SNW1	0.0152905	0.191812
ASB7	LINS1	0.01524	0.191251
RNF31	PSME2	0.0149777	0.19069
SPATA5L1	GATM	0.0148909	0.190129
POLR2H	CLCN2	0.0148856	0.189568
STK16	GLB1L	0.0147035	0.189007
DCAF11	NRL	0.0146919	0.188446
SAP30BP	RECQL5	0.0144961	0.187886
PRMT7	SMPD3	0.0142046	0.187325
ERC1	RAD52	0.014191	0.186764
GPATCH11	HEATR5B	0.0141652	0.186203
STS	PUDP	0.0141243	0.185642
PFAS	CTC1	0.0140893	0.185081
SLX1A	BOLA2B	0.0139926	0.18452
TFG	ABI3BP	0.0139799	0.18396
ARMC10	FBXL13	0.0139392	0.183399
PHF7	BAP1	0.0138124	0.182838
SPHK2	DBP	0.0137312	0.182277
GPR62	PCBP4	0.0135786	0.181716
AL121594.1	PPP2R3C	0.0133779	0.181155
RDH5	CD63	0.0131916	0.180595
PSMD8	GGN	0.0131559	0.180034
TELO2	IFT140	0.0128976	0.179473
NT5DC1	TSPYL4	0.0127026	0.178912
ZNF593	AL391650.1	0.0122264	0.178351
AC008763.2	XAB2	0.0121409	0.17779
VWA5B2	ALG3	0.0121334	0.177229
WBP1	MOGS	0.0120487	0.176669
DNAAF5	PRKAR1B	0.0119507	0.176108
PPP4C	TBX6	0.0118736	0.175547
PRUNE1	MINDY1	0.0118658	0.174986
PNRC2	SRSF10	0.0116984	0.174425
CRB2	DENND1A	0.0116686	0.173864
PPP1R7	PASK	0.0115305	0.173303
SNPH	SDCBP2	0.0114689	0.172743
MAP1A	TP53BP1	0.011204	0.172182
NEK11	ASTE1	0.0111493	0.171621
EPB41	TMEM200B	0.0111441	0.17106
MFSD3	RECQL4	0.0110966	0.170499
SAC3D1	NAALADL1	0.0110117	0.169938
LARP1	FAXDC2	0.0110109	0.169377
IL23A	PAN2	0.0109078	0.168817
FERMT3	TRPT1	0.0108027	0.168256
PRXL2B	MMEL1	0.0104624	0.167695
NAB2	NEMP1	0.0103695	0.167134
CHCHD7	PLAG1	0.0102253	0.166573
JMY	DMGDH	0.00964732	0.166012
SLX1B	BOLA2-SMG1P6	0.0095328	0.165451
BBOF1	ENTPD5	0.00939778	0.164891
ARHGEF4	FAM168B	0.00890227	0.16433
TMEM126B	DLG2	0.00887723	0.163769
H2AC20	H2BC21	0.00864621	0.163208
SRRT	UFSP1	0.00856075	0.162647
ERAS	PCSK1N	0.00848946	0.162086
ARL6IP5	LMOD3	0.00834113	0.161526
ZFYVE9	CC2D1B	0.00830018	0.160965
USP35	GAB2	0.00829535	0.160404
ZFYVE19	DNAJC17	0.00798506	0.159843
GPR89A	PDZK1	0.00787233	0.159282
MEST	COPG2	0.00765958	0.158721
SETDB2	CAB39L	0.0076305	0.15816
EMID1	RHBDD3	0.00732918	0.1576
CARMIL2	ACD	0.00724894	0.157039
ZMYM1	AC114490.2	0.00710318	0.156478
MYLPF	TBC1D10B	0.00704585	0.155917
FAM81A	MYO1E	0.0069895	0.155356
THOC6	BICDL2	0.00697757	0.154795
DDX20	INKA2	0.00680835	0.154234
BRCC3	CMC4	0.00673763	0.153674
HCST	NFKBID	0.0065842	0.153113
TUBB4B	FAM166A	0.00620997	0.152552
OAZ1	JSRP1	0.006163	0.151991
EML6	RTN4	0.00614475	0.15143
ANKRD13B	CORO6	0.00613227	0.150869
ANKZF1	GLB1L	0.00608351	0.150308
TGM4	ZDHHC3	0.0058438	0.149748
BRD2	HLA-DMA	0.00580428	0.149187
SPDYE2	POLR2J3	0.00552367	0.148626
RHOQ	ATP6V1E2	0.00550552	0.148065
TARBP2	MAP3K12	0.00540642	0.147504
AANAT	RHBDF2	0.00539767	0.146943
EMC6	P2RX5-TAX1BP3	0.0052563	0.146383
C16orf86	ENKD1	0.00517098	0.145822
SLC25A27	CYP39A1	0.00483392	0.145261
U2SURP	PAQR9	0.00465627	0.1447
PAK1IP1	C6orf52	0.00454461	0.144139
DNAJC24	DCDC1	0.00450665	0.143578
NIP7	TMED6	0.0044884	0.143017
MSH5-SAPCD1	CLIC1	0.00414927	0.142457
HSD11B2	ATP6V0D1	0.00402976	0.141896
LIG3	CCT6B	0.00396078	0.141335
SUPT6H	PROCA1	0.00333331	0.140774
ERMAP	SVBP	0.00330821	0.140213
MPV17L2	RAB3A	0.00318926	0.139652
STK11	CBARP	0.00309784	0.139091
PPIE	HPCAL4	0.00235294	0.138531
CAPS	RANBP3	0.00226915	0.13797
RIBC1	HSD17B10	0.00209901	0.137409
BGN	HAUS7	0.00194883	0.136848
KREMEN2	PKMYT1	0.00158462	0.136287
ZNF276	VPS9D1	0.00154931	0.135726
TSSK3	BSDC1	0.00135077	0.135165
PAK6	PLCB2	0.00132617	0.134605
IQCH	AAGAB	0.00112149	0.134044
PCCA	GGACT	0.000858151	0.133483
ANKRD53	TEX261	0.000828595	0.132922
SPNS2	MYBBP1A	0.000570884	0.132361
STAG3	GPC2	0.00055924	0.1318
MAST1	DNASE2	5.11e-05	0.131239
ZNF501	KIAA1143	-6.37e-05	0.130679
C12orf60	WBP11	-0.00017467	0.130118
TUBG2	PLEKHH3	-0.000413709	0.129557
DGLUCY	RPS6KA5	-0.000644459	0.128996
MSH5-SAPCD1	VWA7	-0.000694927	0.128155
SLC27A2	ATP8B4	-0.000694927	0.128155
EAF2	IQCB1	-0.000709365	0.127314
KIAA2012	SUMO1	-0.00071124	0.126753
GRIN1	LRRC26	-0.000983117	0.126192
H2AC13	H2BC13	-0.000988015	0.125631
ZNF449	ZNF75D	-0.00102424	0.12507
KCNK15	RIMS4	-0.00120449	0.124509
ABHD1	PREB	-0.00136804	0.123948
WFIKKN1	METTL26	-0.00137498	0.123388
SLX1B	BOLA2	-0.00139082	0.122827
H2BU1	H2AW	-0.00139131	0.122266
EXTL1	SLC30A2	-0.00155918	0.121705
LRRC36	KCTD19	-0.00170399	0.120864
SLC2A4	YBX2	-0.00170399	0.120864
USP30	ALKBH2	-0.00183701	0.120022
TUB	RIC3	-0.00184245	0.119462
TTC6	FOXA1	-0.00193742	0.118901
EHBP1L1	KCNK7	-0.00196671	0.11834
INVS	TEX10	-0.00203494	0.117779
LRRIQ1	TSPAN19	-0.00220446	0.117218
ITK	HAVCR2	-0.00221235	0.116657
RFXANK	BORCS8-MEF2B	-0.00240709	0.116096
ZNF383	ZNF585B	-0.00249061	0.115536
TMOD2	LYSMD2	-0.0024933	0.114975
C6orf58	SOGA3	-0.00284177	0.114414
PILRA	ZCWPW1	-0.00290436	0.113853
SCNM1	TMOD4	-0.00297923	0.113292
IL17RB	CHDH	-0.00326664	0.112731
TROAP	C1QL4	-0.00336947	0.11217
LRRC63	LCP1	-0.00340203	0.11161
FAM217B	SYCP2	-0.00348101	0.111049
SNORC	NGEF	-0.00349128	0.110488
CALML6	TMEM52	-0.00366986	0.109927
GIPC3	TBXA2R	-0.00371154	0.109366
TMEM190	TMEM238	-0.00373091	0.108805
INO80E	DOC2A	-0.0037826	0.108245
ALG11	NEK5	-0.00404004	0.107684
PRKCSH	CCDC151	-0.00405161	0.107123
THUMPD3	SRGAP3	-0.00412356	0.106562
EPS8L1	RDH13	-0.00419232	0.106001
SERF2	ELL3	-0.00423464	0.10544
TMEM59L	CRLF1	-0.00436443	0.104879
F2RL3	CPAMD8	-0.00441974	0.104319
BICRAL	TBCC	-0.00442984	0.103758
HSD3B7	STX1B	-0.00450891	0.103197
TBC1D17	IL4I1	-0.00459735	0.102636
SHLD3	TRIM23	-0.00460933	0.102075
TMEM182	MFSD9	-0.0047092	0.101514
PLEKHG4	KCTD19	-0.00491684	0.100953
PLA2G4B	SPTBN5	-0.00492382	0.100393
ZNF398	ZNF425	-0.00497392	0.0998317
NPAS1	TMEM160	-0.00509077	0.0992709
DRC3	TOM1L2	-0.00509237	0.09871
CDH23	PSAP	-0.00525152	0.0981492
BGLAP	PAQR6	-0.00533008	0.0975883
AL121845.3	ARFRP1	-0.00541992	0.0970275
TLX2	DQX1	-0.00546185	0.0964666
AP002373.1	C11orf71	-0.00557225	0.0959058
VASH2	ANGEL2	-0.00560571	0.0953449
JMJD7-PLA2G4B	SPTBN5	-0.00593729	0.0947841
B2M	PATL2	-0.00606279	0.0942232
THBS4	MTX3	-0.00613681	0.0936624
TTC21A	GORASP1	-0.00617523	0.0931015
CACNA1H	TPSG1	-0.00619169	0.0925407
EHD3	CAPN14	-0.00631391	0.0919798
SLC25A46	TMEM232	-0.00631921	0.091419
GLIPR1L2	CAPS2	-0.00644229	0.0908581
ZMYM1	ZMYM6	-0.0064746	0.0902973
PLK3	TCTEX1D4	-0.00663094	0.0897364
SLC39A10	DNAH7	-0.00664484	0.0891755
ALDH5A1	GPLD1	-0.00672113	0.0886147
ENO4	HSPA12A	-0.00678021	0.0880538
CSKMT	AP001458.2	-0.00716179	0.087493
ZNF646	PRSS53	-0.0072367	0.0869321
ZMYND15	CXCL16	-0.00751167	0.0863713
REEP6	PCSK4	-0.00754654	0.0858104
DCTN5	PALB2	-0.00765618	0.0852496
TRAF7	CASKIN1	-0.00816218	0.0846887
SLF1	KIAA0825	-0.00823573	0.0841279
ZNF140	ZNF891	-0.00823895	0.083567
RTEL1	STMN3	-0.00827721	0.0830062
RIOK1	CAGE1	-0.00853397	0.0824453
MRPL30	MITD1	-0.00868998	0.0818845
TESK1	CD72	-0.00870621	0.0813236
NSUN3	DHFR2	-0.00896801	0.0807628
GALNT5	ERMN	-0.00903736	0.0802019
ZNF283	LYPD5	-0.00921825	0.0796411
PDIA3	ELL3	-0.00925155	0.0790802
ANXA9	MINDY1	-0.00946116	0.0785193
TJAP1	LRRC73	-0.00980142	0.0779585
NAA60	ZNF597	-0.00982542	0.0773976
PKIB	SERINC1	-0.00984367	0.0768368
LRRC56	LMNTD2	-0.00985526	0.0762759
PPFIA3	HRC	-0.00995859	0.0757151
SH3BGR	LCA5L	-0.00998127	0.0751542
SLC39A5	ANKRD52	-0.0100088	0.0745934
ATP10D	CORIN	-0.0100977	0.0740325
ARAF	SYN1	-0.0101437	0.0734717
SMCR8	SHMT1	-0.0102953	0.0729108
STKLD1	SURF4	-0.010475	0.07235
ZACN	SRP68	-0.0105109	0.0717891
VPS4A	PDF	-0.0105566	0.0712283
RPS27	NUP210L	-0.0107009	0.0706674
SHROOM2	GPR143	-0.0107423	0.0701066
WDR97	SHARPIN	-0.0109119	0.0695457
HPDL	MUTYH	-0.0109398	0.0689849
SMCR8	TOP3A	-0.0111416	0.068424
TRIM46	KRTCAP2	-0.0111595	0.0678632
TMEM50A	RHCE	-0.0112219	0.0673023
TTC16	TOR2A	-0.0112223	0.0667414
ZBTB37	SERPINC1	-0.0113697	0.0661806
CCN6	TUBE1	-0.0115066	0.0656197
MYH7B	TRPC4AP	-0.0116065	0.0650589
RUNDC1	PTGES3L-AARSD1	-0.0117098	0.064498
ZIK1	ZNF416	-0.011757	0.0639372
VWA2	AFAP1L2	-0.0117587	0.0633763
MSH5	CLIC1	-0.0117972	0.0628155
ZNF10	ZNF891	-0.0118265	0.0622546
AZIN2	AK2	-0.0118876	0.0616938
STKLD1	REXO4	-0.0119823	0.0611329
UTP14C	NEK5	-0.0122559	0.0605721
CCDC102B	TMX3	-0.0123143	0.0600112
FASTKD2	MDH1B	-0.0124358	0.0594504
EAF1	COLQ	-0.0125909	0.0588895
PLK1	ERN2	-0.0126168	0.0583287
AMH	JSRP1	-0.0127115	0.0577678
AANAT	UBE2O	-0.0127292	0.057207
EIF3K	MAP4K1	-0.0132187	0.0566461
RPS28	KANK3	-0.0132582	0.0560853
C18orf54	STARD6	-0.0133168	0.0555244
CAMKMT	PREPL	-0.0134795	0.0549635
DNAAF1	TAF1C	-0.0135562	0.0544027
GAS2L1	RASL10A	-0.0136228	0.0538418
MYL5	SLC49A3	-0.0139617	0.053281
SPRED3	GGN	-0.0142497	0.0527201
ARPC4-TTLL3	TADA3	-0.0142688	0.0521593
KLHDC9	PFDN2	-0.0144038	0.0515984
KAT8	PRSS8	-0.0147635	0.0510376
CTNS	P2RX5-TAX1BP3	-0.014819	0.0504767
CHD1L	FMO5	-0.0148642	0.0499159
RAD51C	TEX14	-0.0152126	0.049355
EIF5A	AC026954.2	-0.0152752	0.0487942
RGS9BP	ANKRD27	-0.0152798	0.0482333
CTNS	AC027796.3	-0.0153453	0.0476725
HDGFL2	PLIN4	-0.0154144	0.0471116
RBM48	PEX1	-0.0155476	0.0465508
DNAAF1	HSDL1	-0.0157032	0.0459899
POLR1C	LRRC73	-0.0158574	0.0454291
WRN	PURG	-0.0159273	0.0448682
AL365205.1	USP49	-0.0161125	0.0443073
CLCN6	MTHFR	-0.0163428	0.0437465
NFIX	LYL1	-0.0166592	0.0431856
WDR62	THAP8	-0.0170186	0.0426248
KLB	RPL9	-0.0170221	0.0420639
NOXA1	EXD3	-0.0170384	0.0415031
SAXO2	EFL1	-0.0172708	0.0409422
CDHR3	ATXN7L1	-0.0174078	0.0403814
NFATC3	ESRP2	-0.0174273	0.0398205
PALM2AKAP2	PTPN3	-0.017466	0.0392597
TMIE	ALS2CL	-0.0176746	0.0386988
ARMH1	TMEM53	-0.0176849	0.038138
CNIH2	YIF1A	-0.017704	0.0375771
ALG11	ATP7B	-0.0179094	0.0370163
TOMM20L	TIMM9	-0.0180602	0.0364554
CCDC40	TBC1D16	-0.018083	0.0358946
NDUFA13	TSSK6	-0.0182268	0.0353337
LARGE2	PHF21A	-0.0182524	0.0347729
HCN2	POLRMT	-0.0183209	0.034212
FPGS	ENG	-0.0183803	0.0336511
APOBR	CLN3	-0.0185176	0.0330903
RAD9B	VPS29	-0.0185674	0.0325294
ZCCHC17	FABP3	-0.0187689	0.0319686
SNX21	TNNC2	-0.0190275	0.0314077
C9orf43	POLE3	-0.0192562	0.0308469
AKR1D1	CREB3L2	-0.0195917	0.030286
MARK2	RCOR2	-0.0197265	0.0297252
SPDYA	TRMT61B	-0.0197926	0.0291643
DRAXIN	MAD2L2	-0.0200509	0.0286035
PRORP	PPP2R3C	-0.0200548	0.0280426
H2AC11	H2BC11	-0.0201655	0.0274818
SAMD15	TMED8	-0.0203117	0.0269209
DYRK4	AKAP3	-0.0203824	0.0263601
AQP6	RACGAP1	-0.0204063	0.0257992
ZNF540	ZFP30	-0.0209413	0.0252384
RUSC2	FAM166B	-0.0212648	0.0246775
CNTNAP1	EZH1	-0.0213829	0.0241167
MYO15B	RECQL5	-0.0214051	0.0235558
C4orf47	UFSP2	-0.0218303	0.022995
IL17RA	TMEM121B	-0.0221642	0.0224341
CHD3	RNF227	-0.022181	0.0218732
ZBTB7B	DCST2	-0.0222008	0.0213124
C22orf15	CHCHD10	-0.0227402	0.0207515
TARBP2	ATF7-NPFF	-0.0229335	0.0201907
IL11RA	CCL27	-0.0230659	0.0196298
TJP3	APBA3	-0.0236153	0.019069
NFKBIB	CCER2	-0.0246651	0.0185081
PLCD4	ZNF142	-0.0251555	0.0179473
SH2D6	CAPG	-0.0252494	0.0173864
SPATA17	GPATCH2	-0.0260329	0.0168256
PDE3B	PSMA1	-0.0260583	0.0162647
RIBC1	SMC1A	-0.0260714	0.0157039
RAB19	SLC37A3	-0.0261051	0.015143
AC092587.1	TSGA10	-0.0263813	0.0145822
VILL	PLCD1	-0.0269908	0.0140213
MAP3K13	EHHADH	-0.0274102	0.0134605
NKIRAS2	ZNF385C	-0.0277088	0.0128996
RAB5B	PMEL	-0.0278296	0.0123388
HIGD1B	EFTUD2	-0.0280894	0.0117779
MACO1	RHCE	-0.0283115	0.011217
TIGD5	PYCR3	-0.0285369	0.0106562
STK36	RNF25	-0.0293679	0.0100953
FOXA3	SYMPK	-0.0310694	0.00953449
RAG1	TRAF6	-0.0312188	0.00897364
CRELD1	PRRT3	-0.0315952	0.00841279
SAMD11	NOC2L	-0.031805	0.00785194
RTEL1-TNFRSF6B	ARFRP1	-0.0320017	0.00729108
HHAT	KCNH1	-0.0321663	0.00673023
SELENOH	BTBD18	-0.0324116	0.00616938
PPT2	PRRT1	-0.0324858	0.00560852
LRRC56	HRAS	-0.0328342	0.00504767
C2orf92	ACTR1B	-0.0332157	0.00448682
PIMREG	PITPNM3	-0.0335691	0.00392597
COPZ1	NFE2	-0.0338672	0.00336512
SAMD4B	GMFG	-0.0341367	0.00280426
ARFIP1	TIGD4	-0.03436	0.00224341
PRKCSH	ELAVL3	-0.035958	0.00168256
ZNF382	ZNF529	-0.0360703	0.0011217
RPS6KB2	PTPRCAP	-0.0372674	0.000560852
